# Supplementary material for: Synthesis, In Vitro Antimicrobial and Cytotoxic Activities of Some New Pyrazolo[1,5-a]pyrimidine Derivatives
Source: PubMed Central journal article supplement (PMC6471749; doi:10.3390/molecules24061080), 2019-03-19

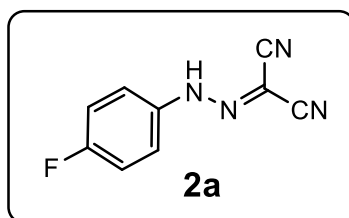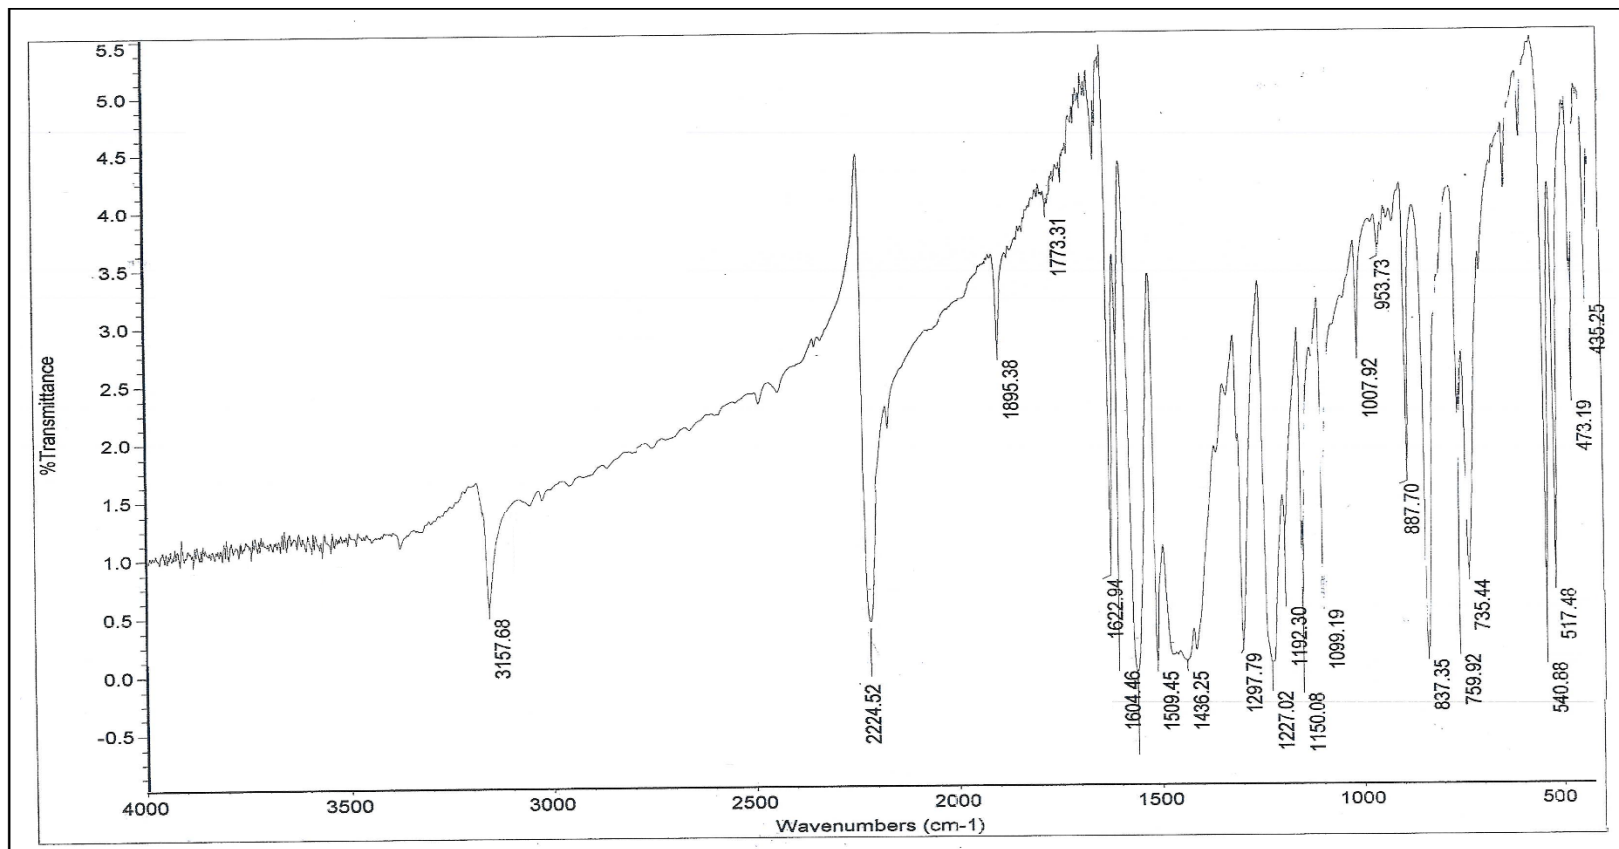

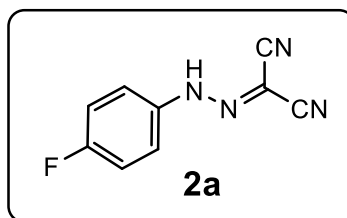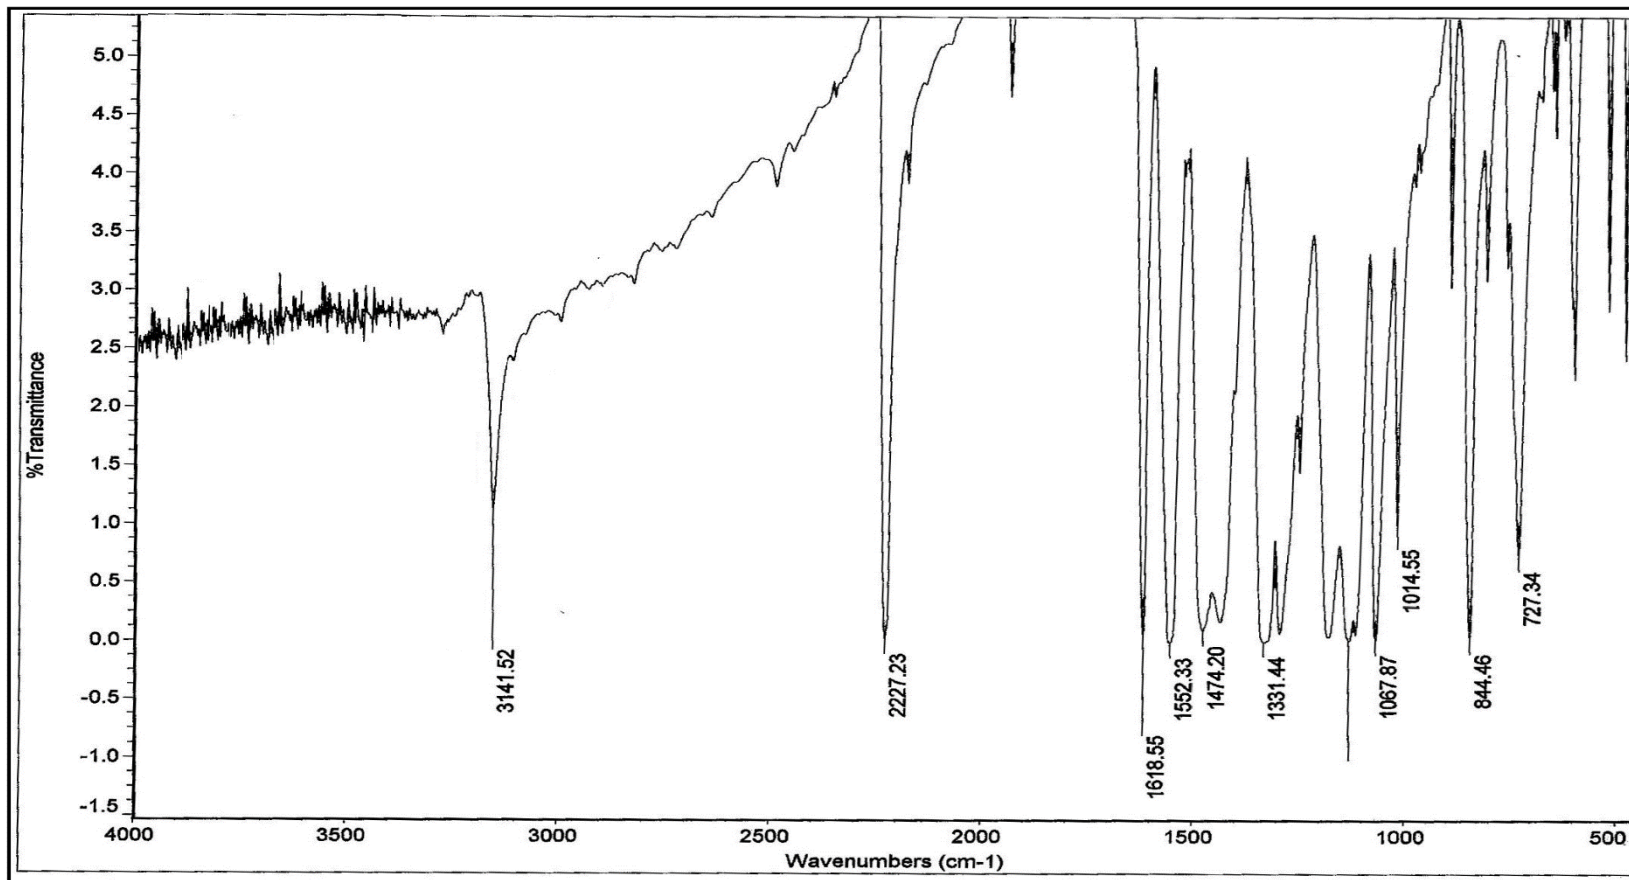

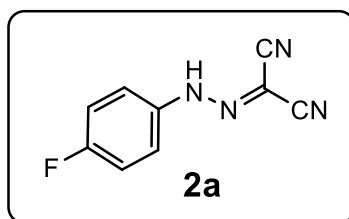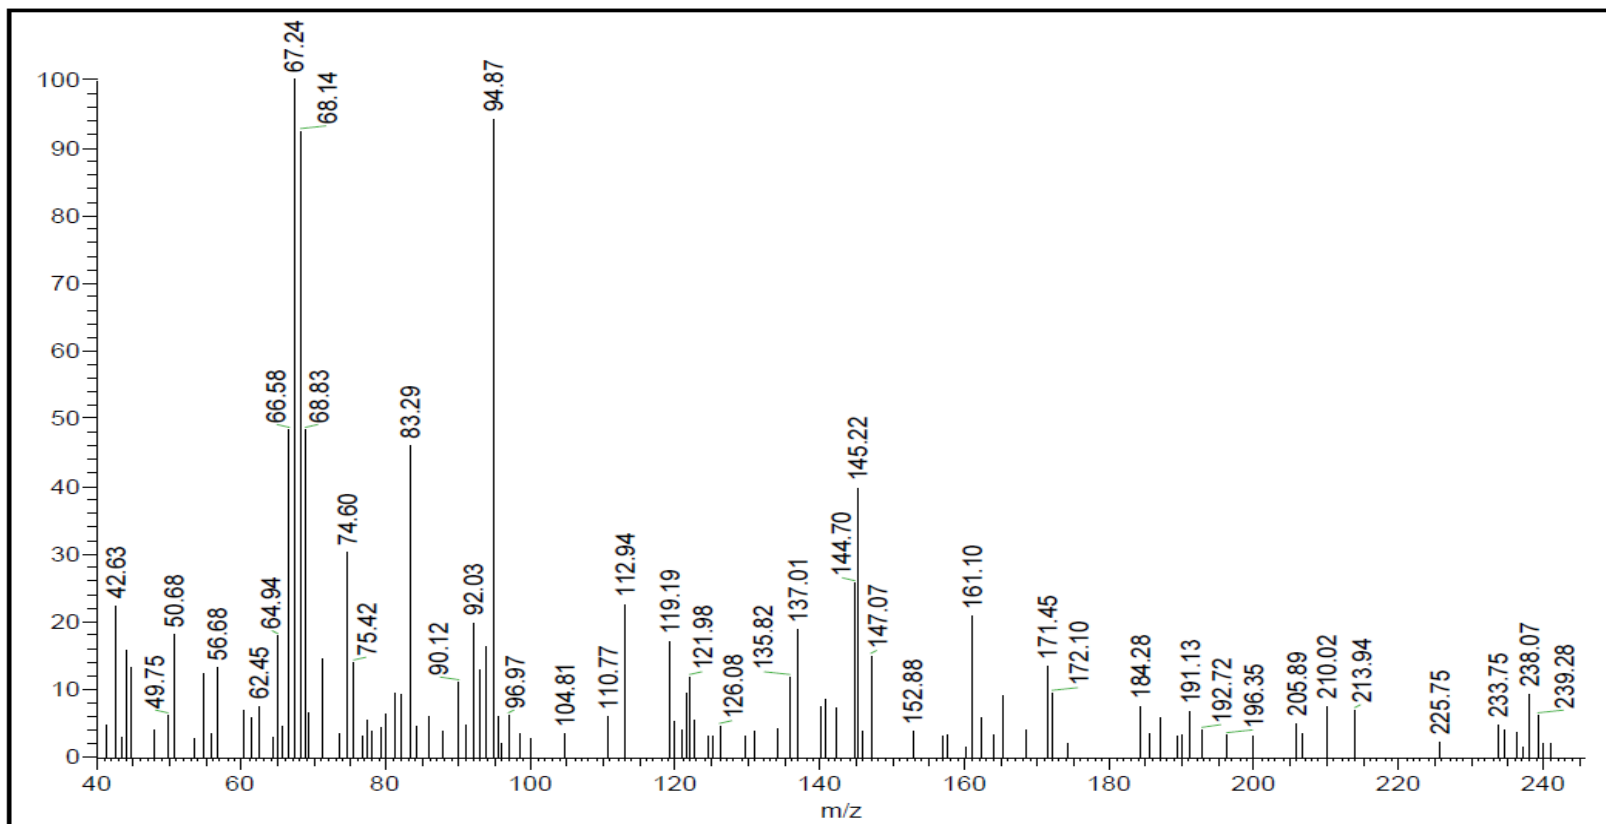

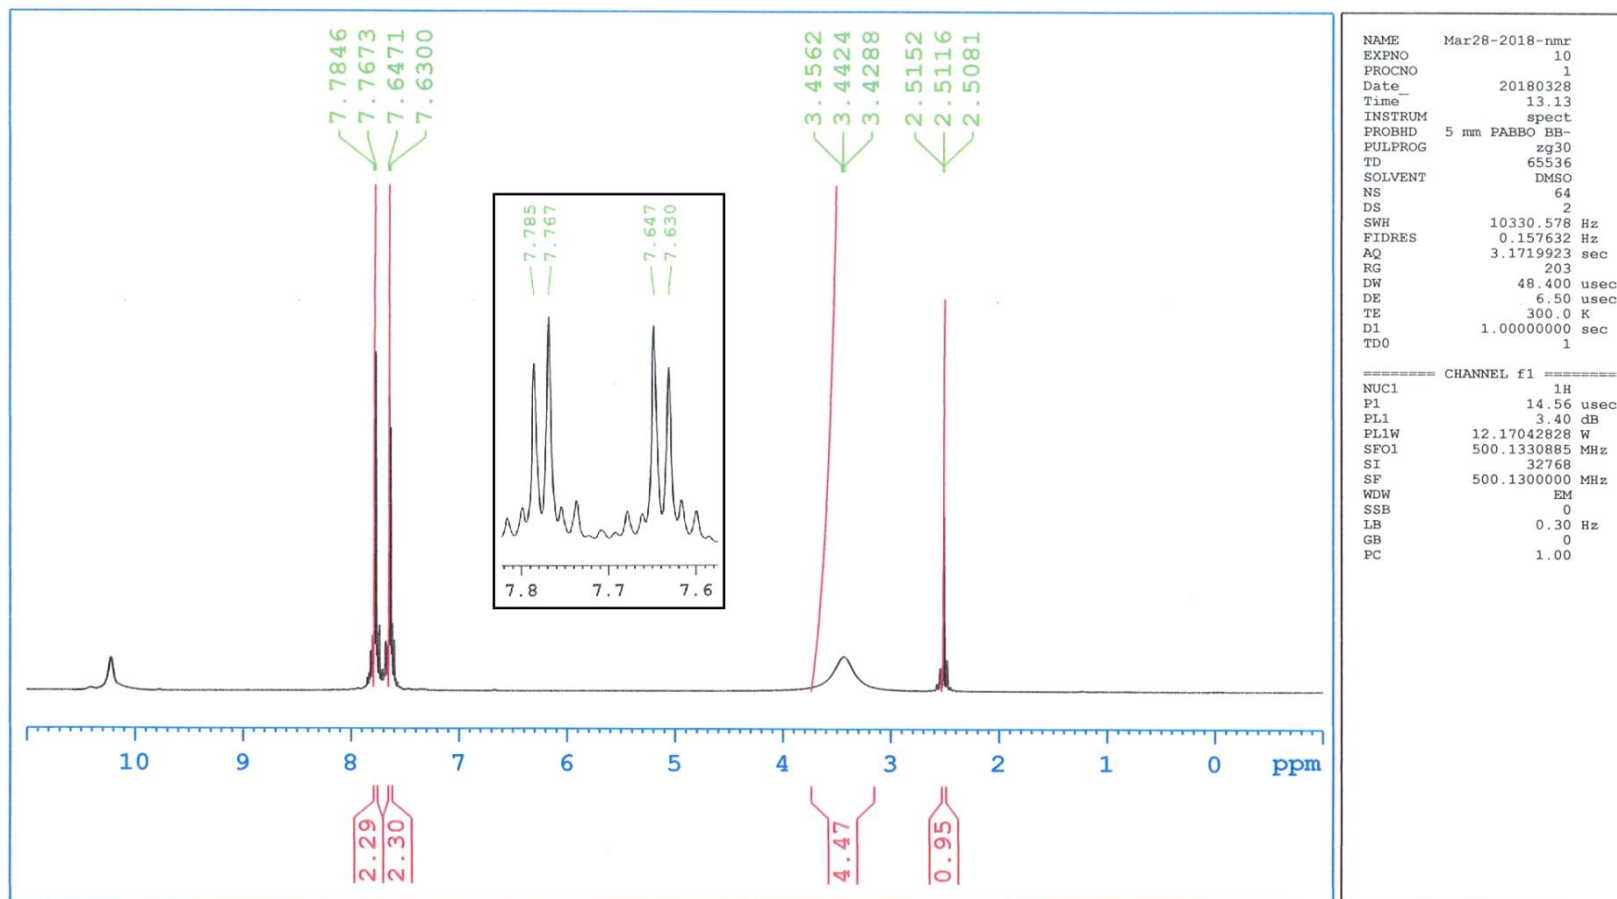



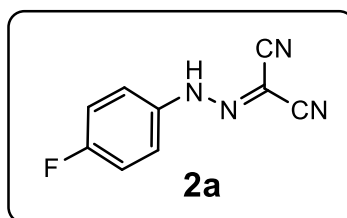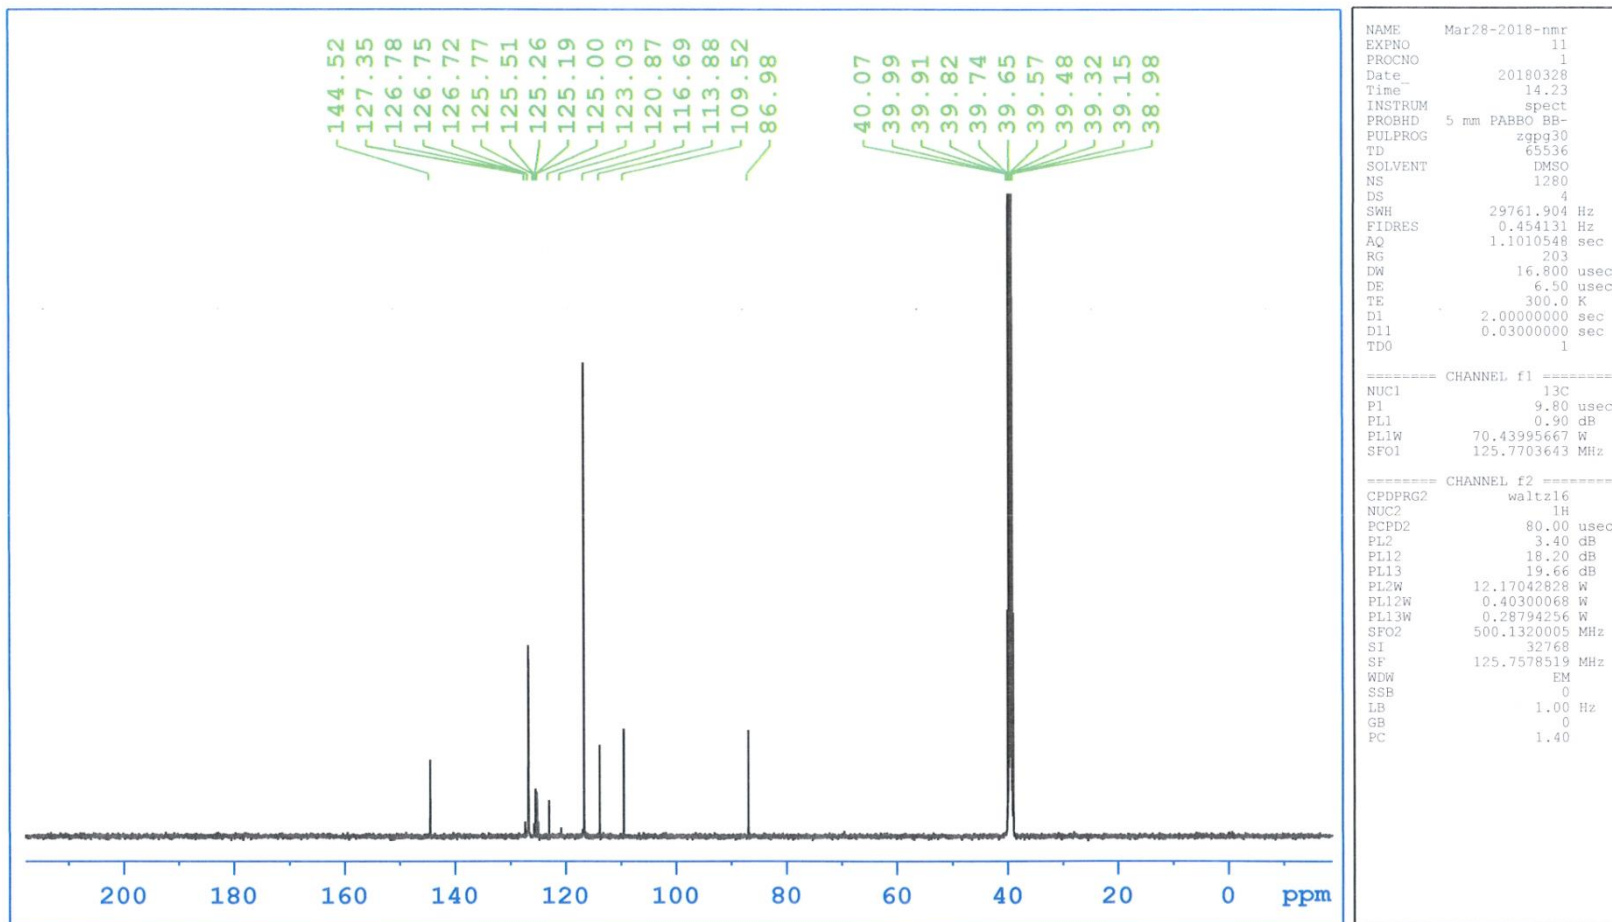

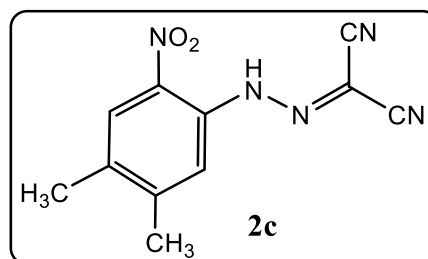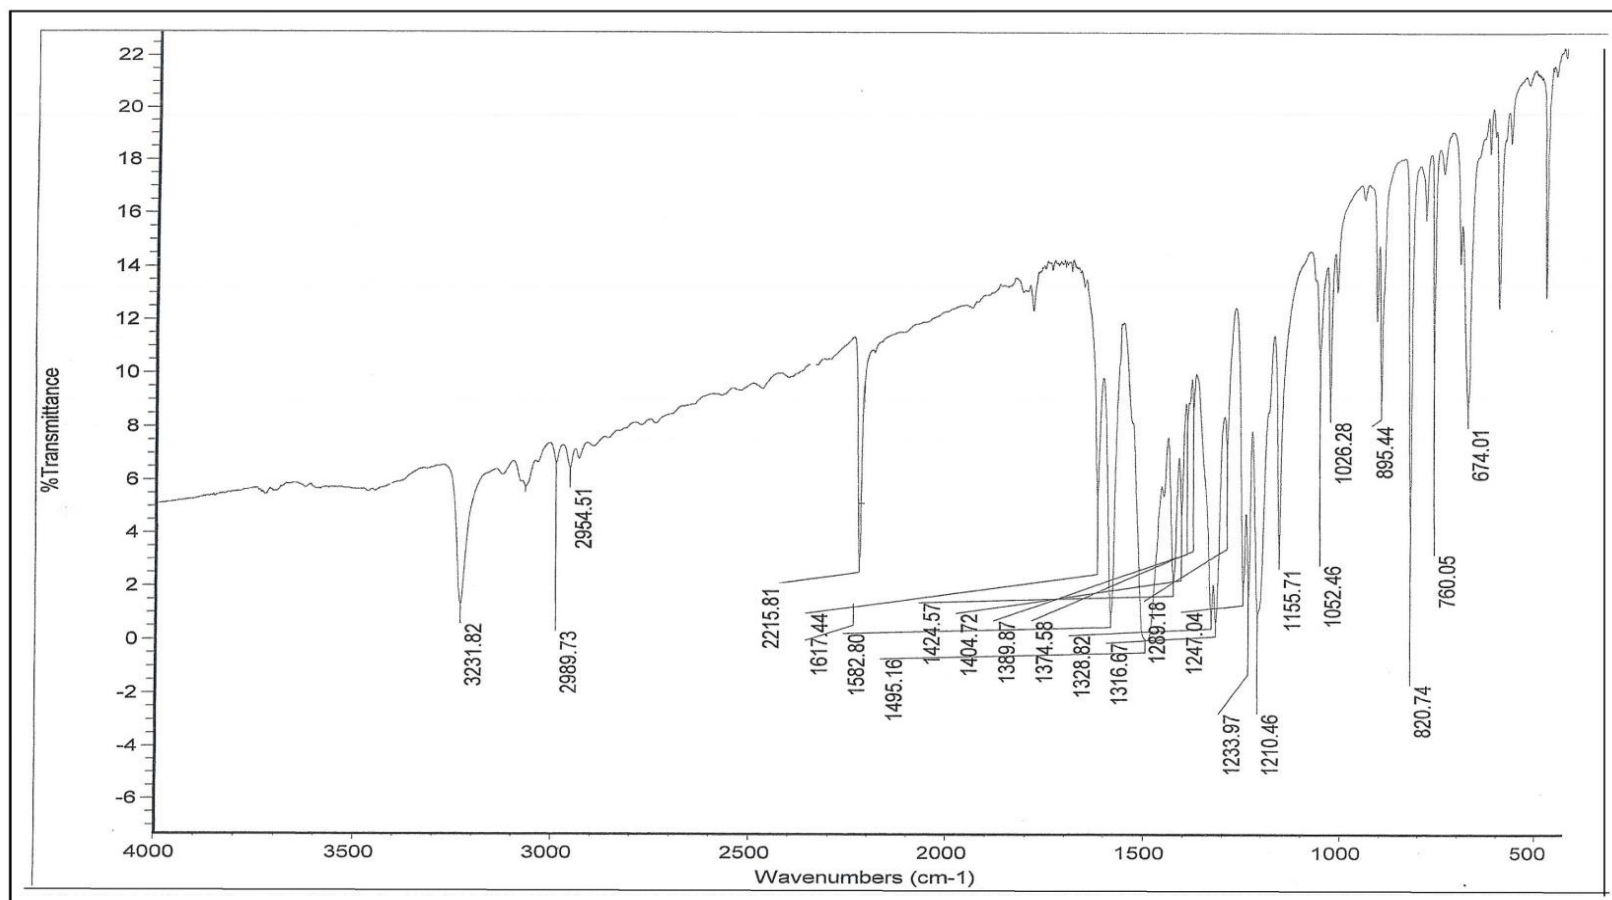

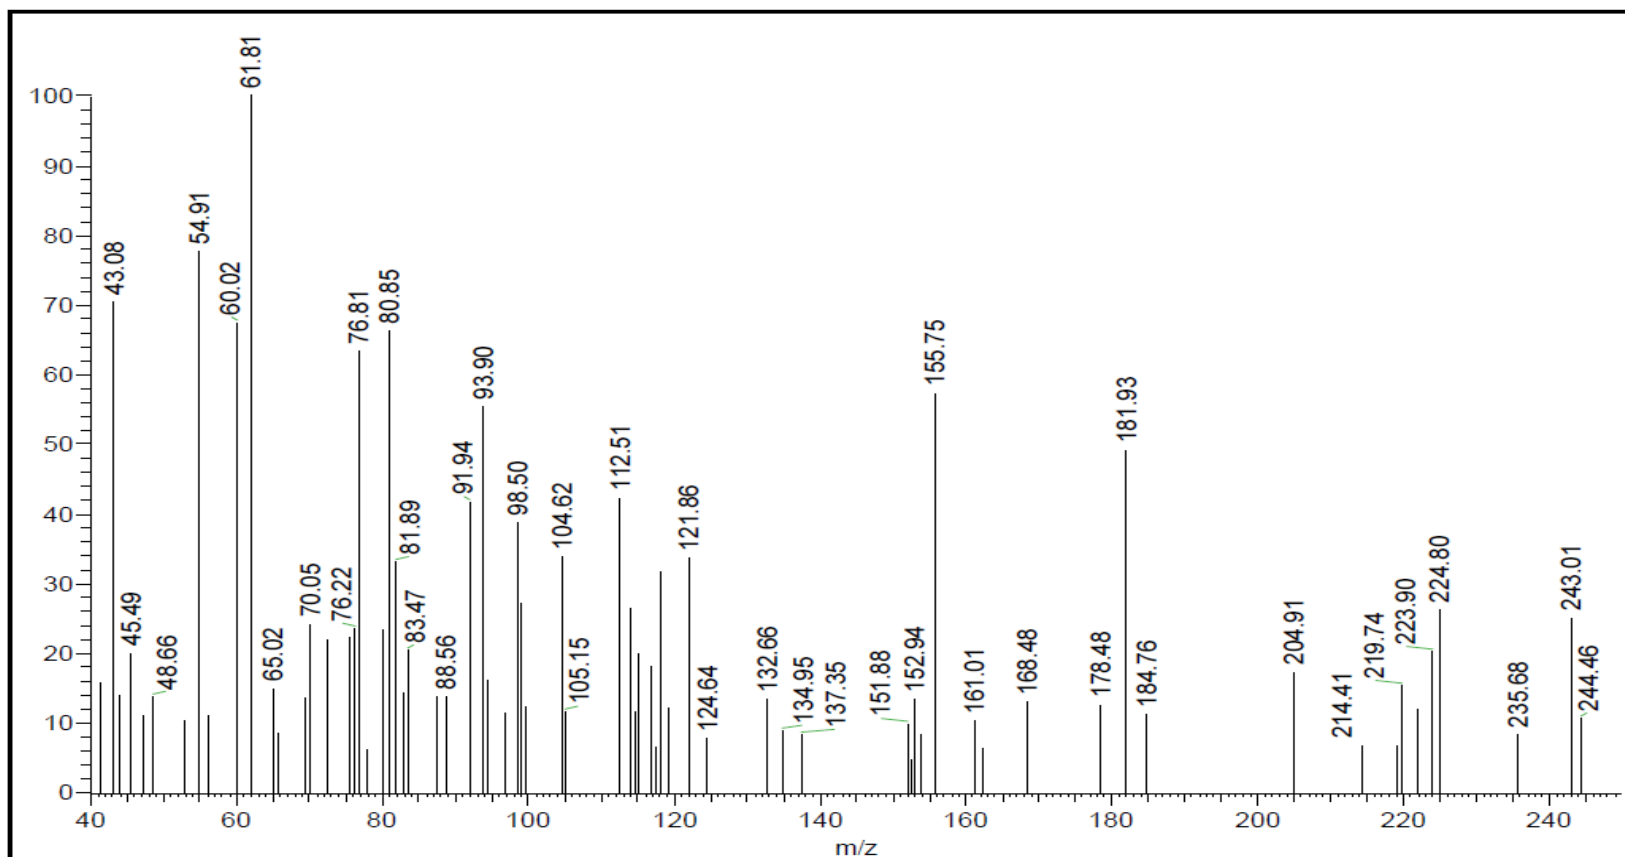

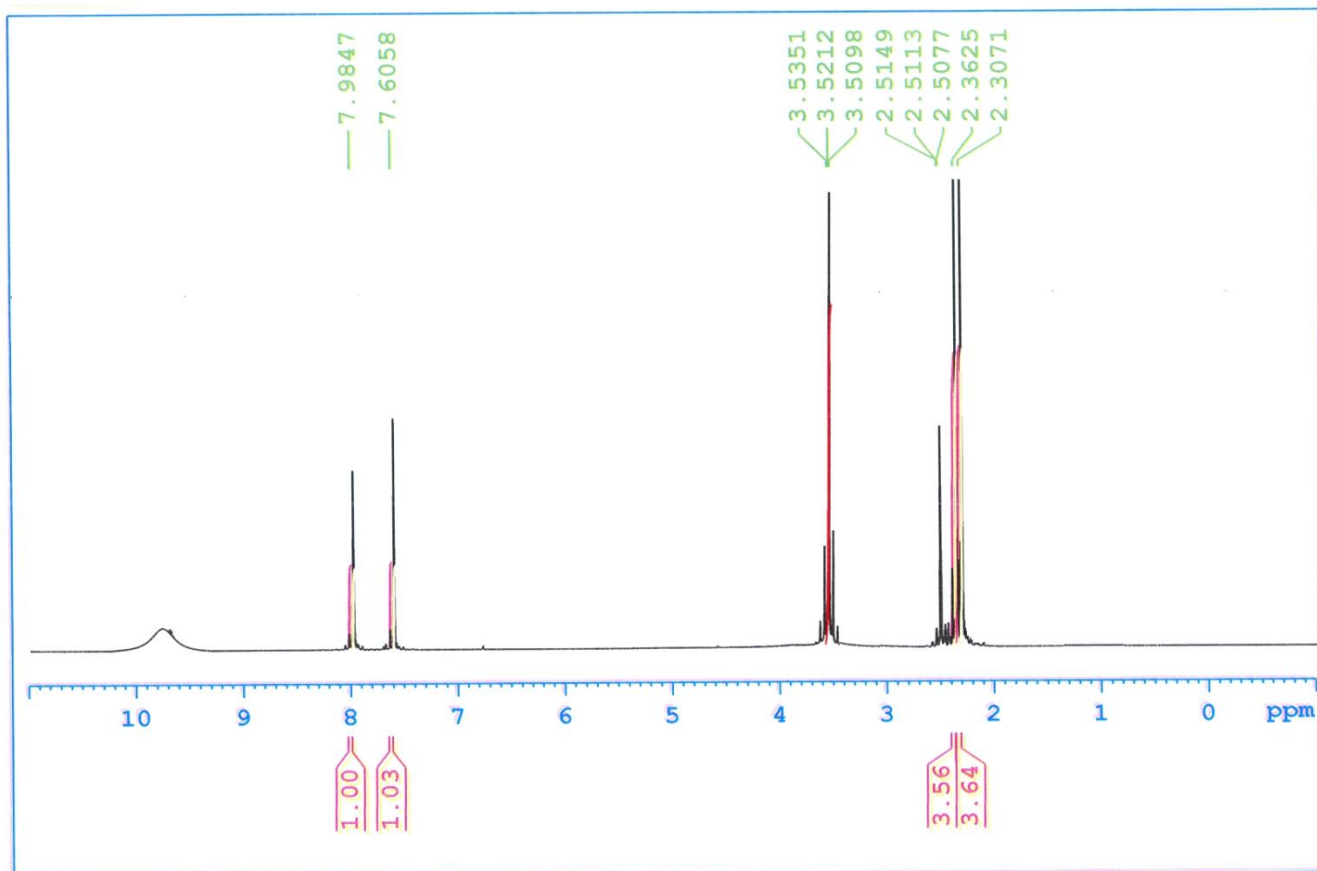

```

NAME      Jan14-2018-nmr
EXPNO     30
PROCNO    1
Date_     20180114
Time_     15.55
INSTRUM   spect
PROBHD    5 mm PABBO BB-
PULPROG   zg30
TD         65536
SOLVENT   DMSO
NS         64
DS         2
SWH        10330.578 Hz
FIDRES     0.157632 Hz
AQ         3.1719923 sec
RG         203
DW         48.400 usec
DE         6.50 usec
TE         300.0 K
D1         1.0000000 sec
TDO        1

```

```

===== CHANNEL f1 =====
NUC1      1H
P1        14.56 usec
PL1       3.40 dB
PL1W      12.17042828 W
SF01      500.1330885 MHz
SI        32768
SF        500.1300000 MHz
WDW       EM
SSB       0
LB        0.30 Hz
GB        0
PC        1.00

```

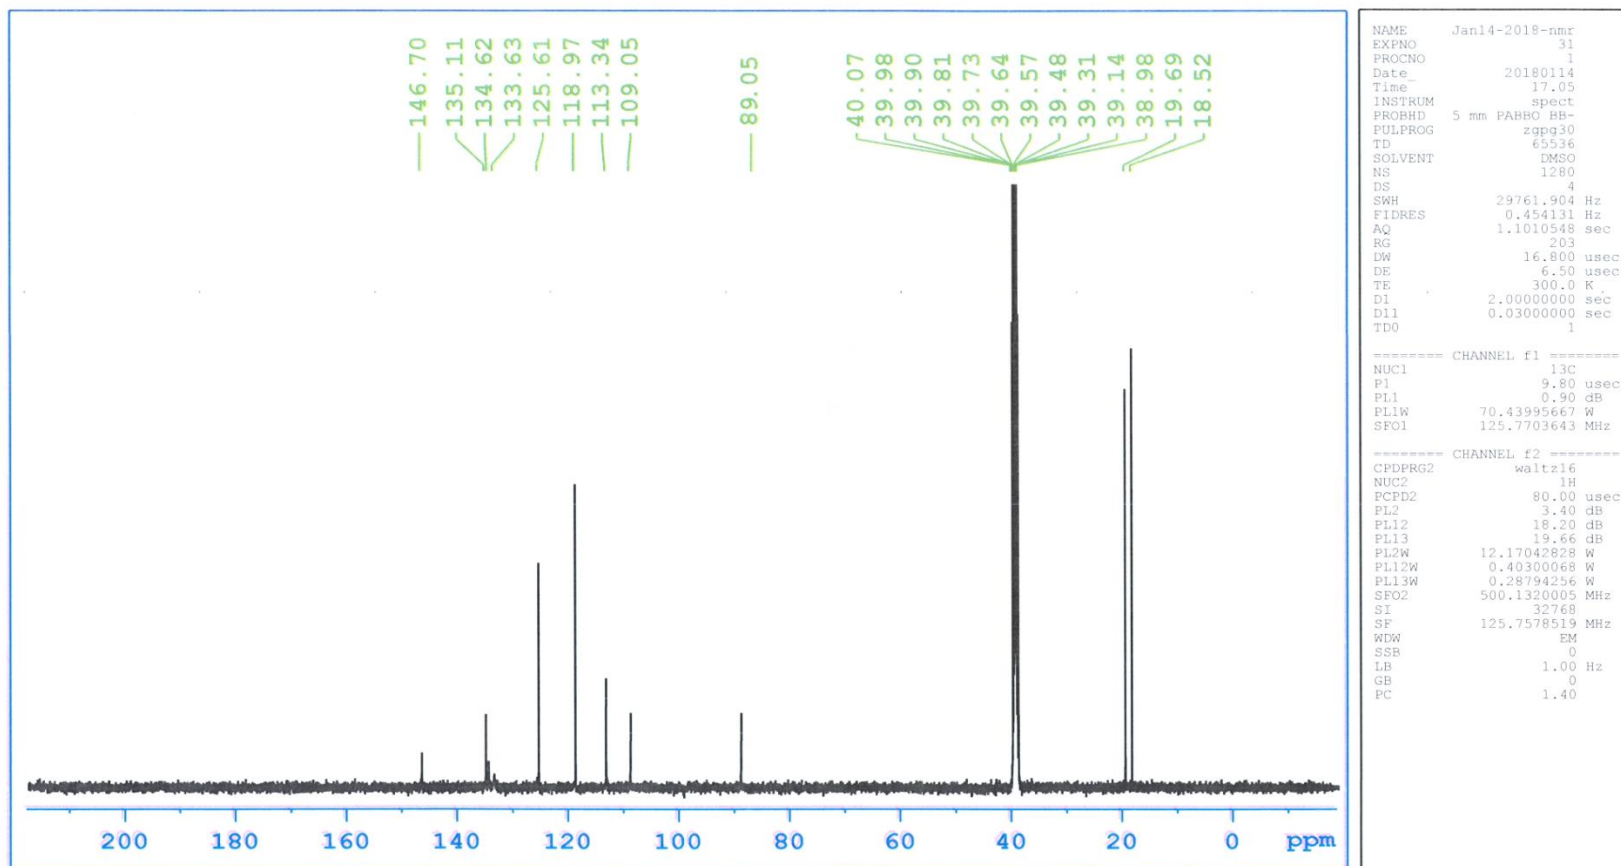

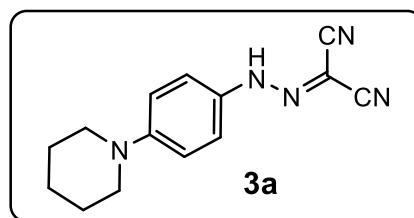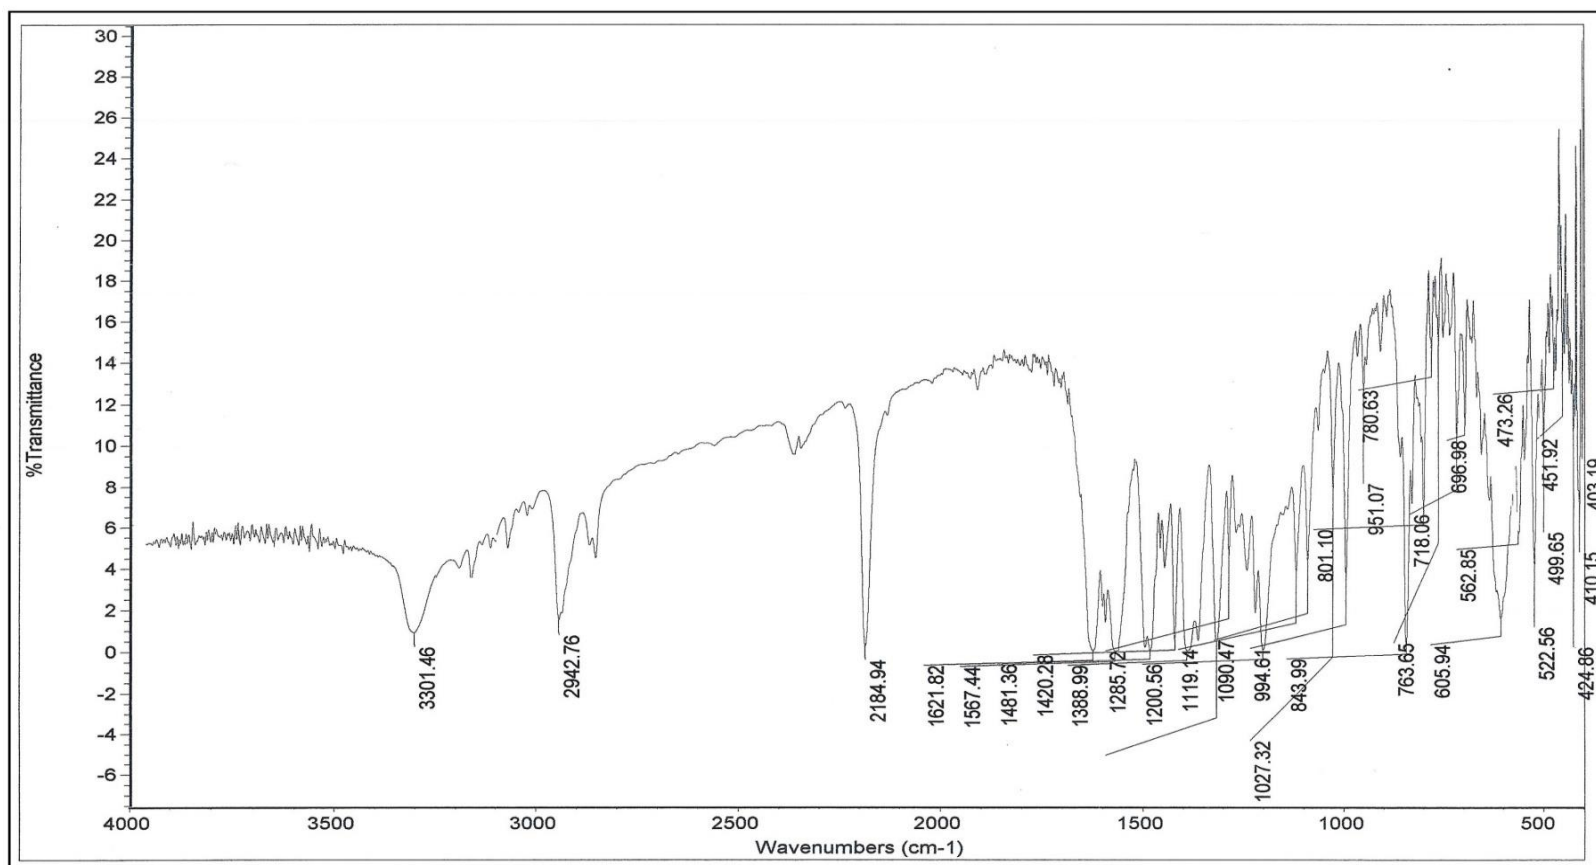

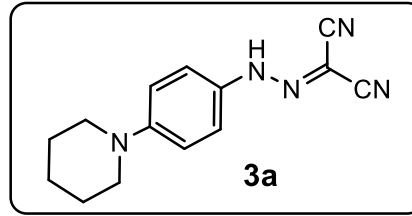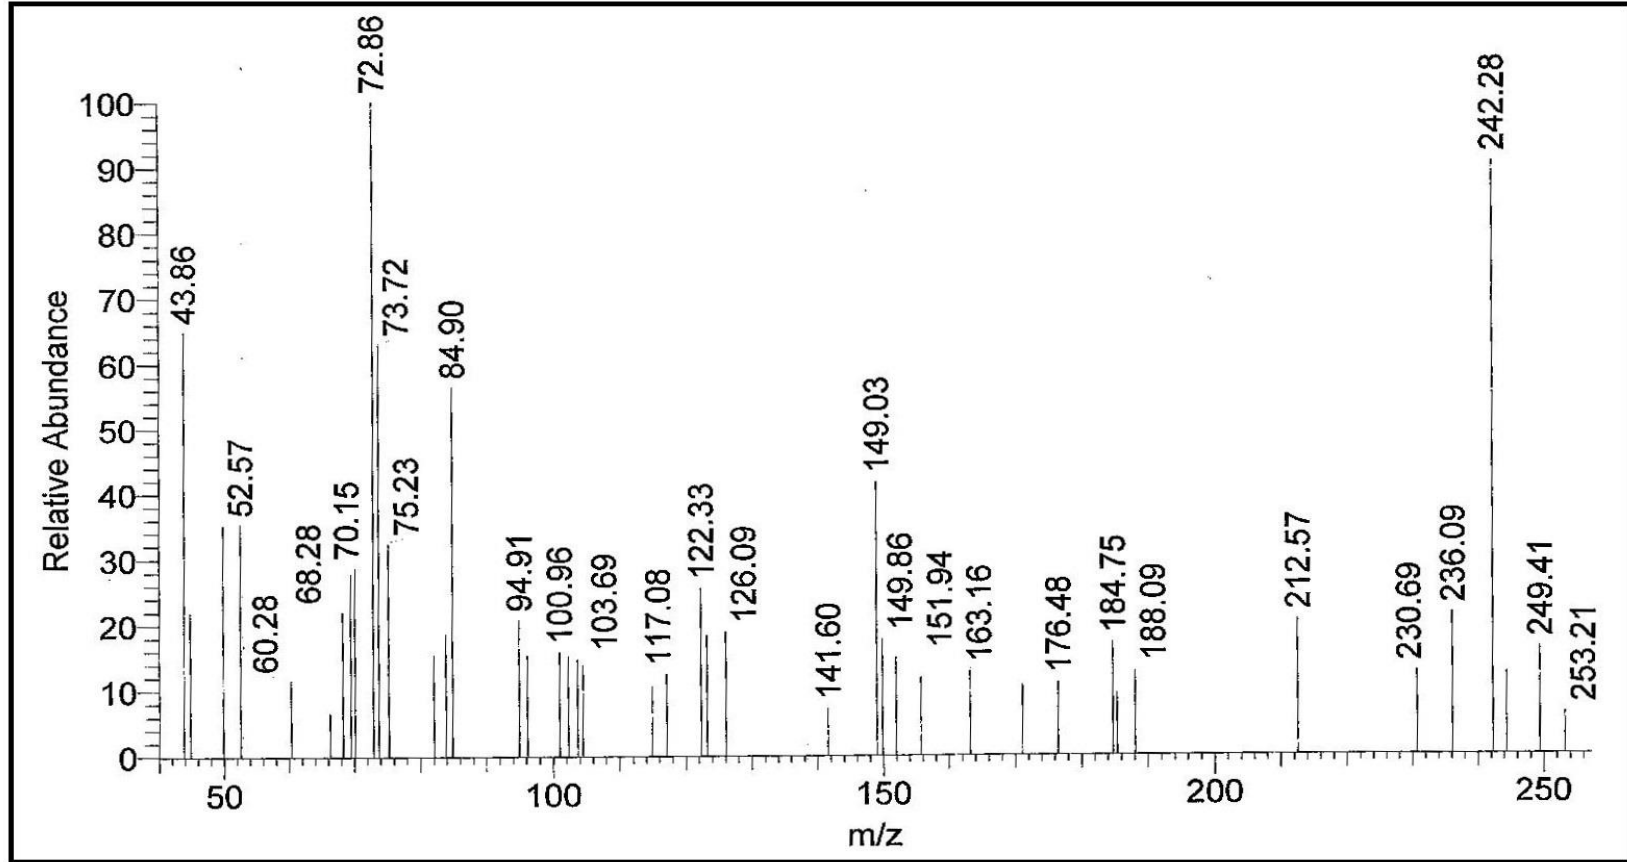

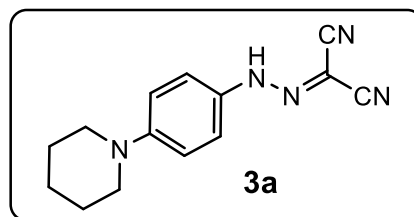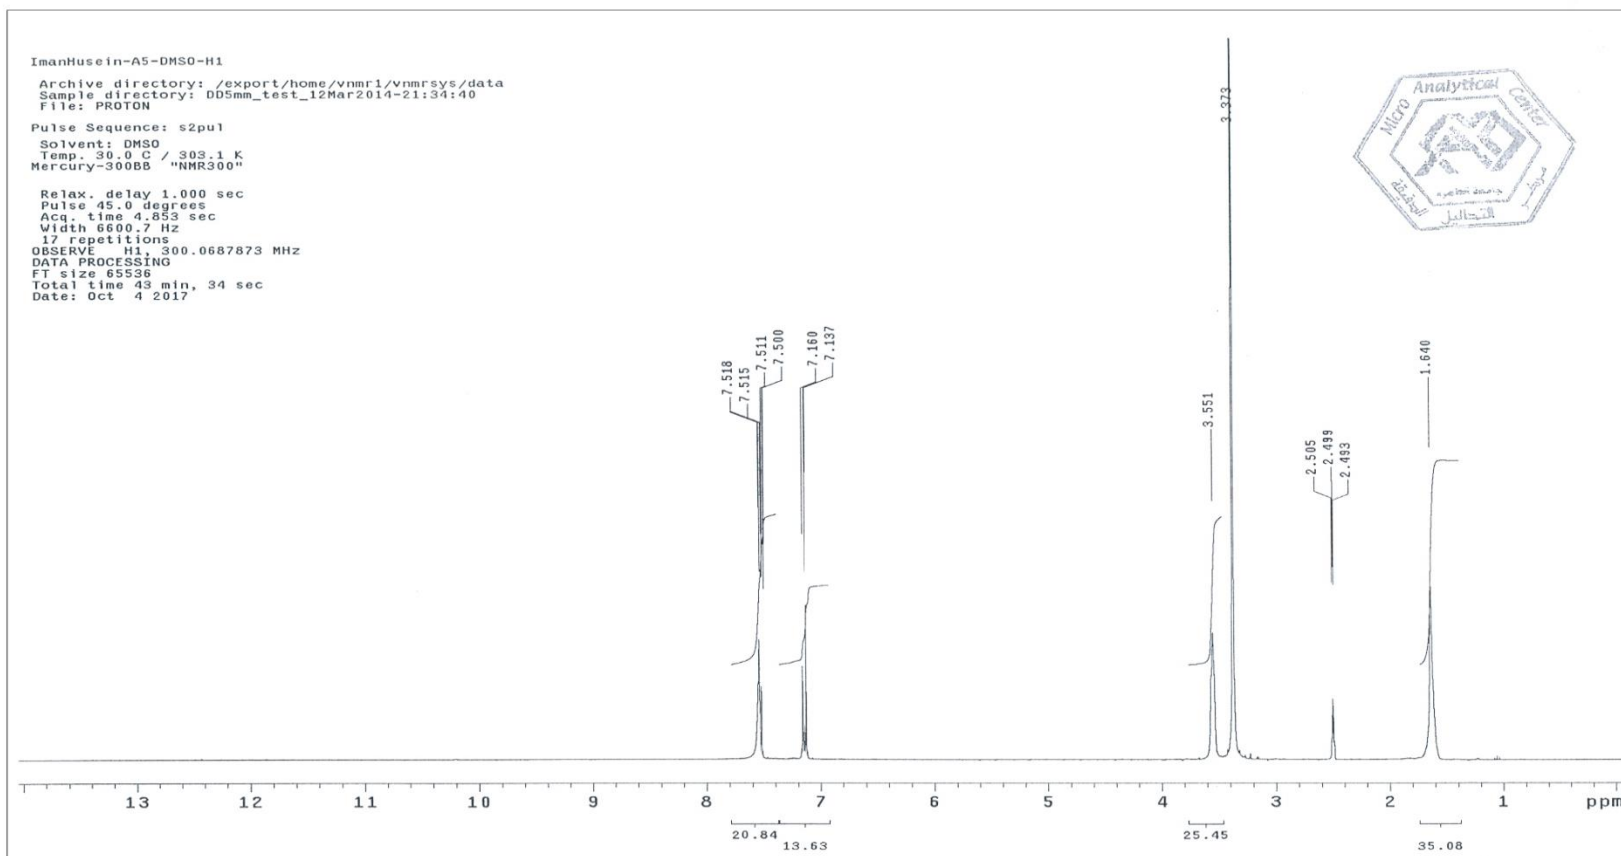



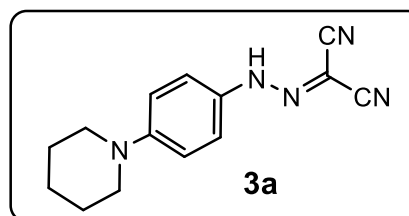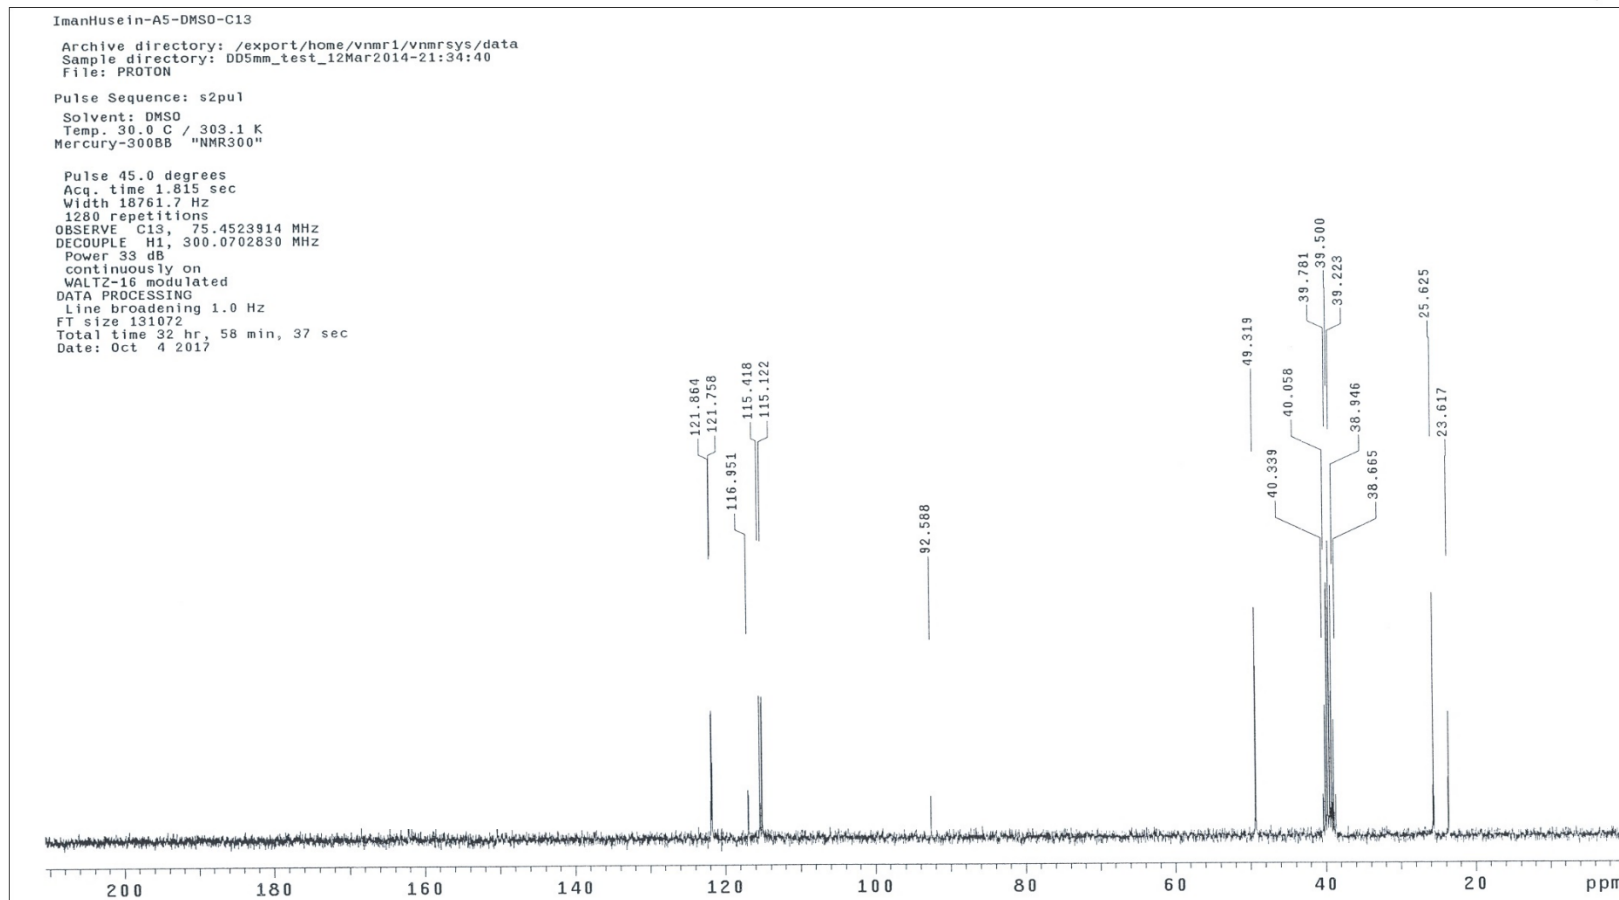

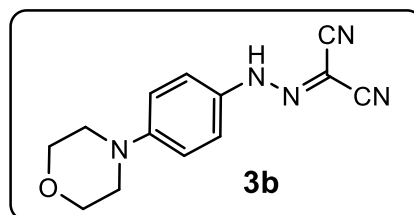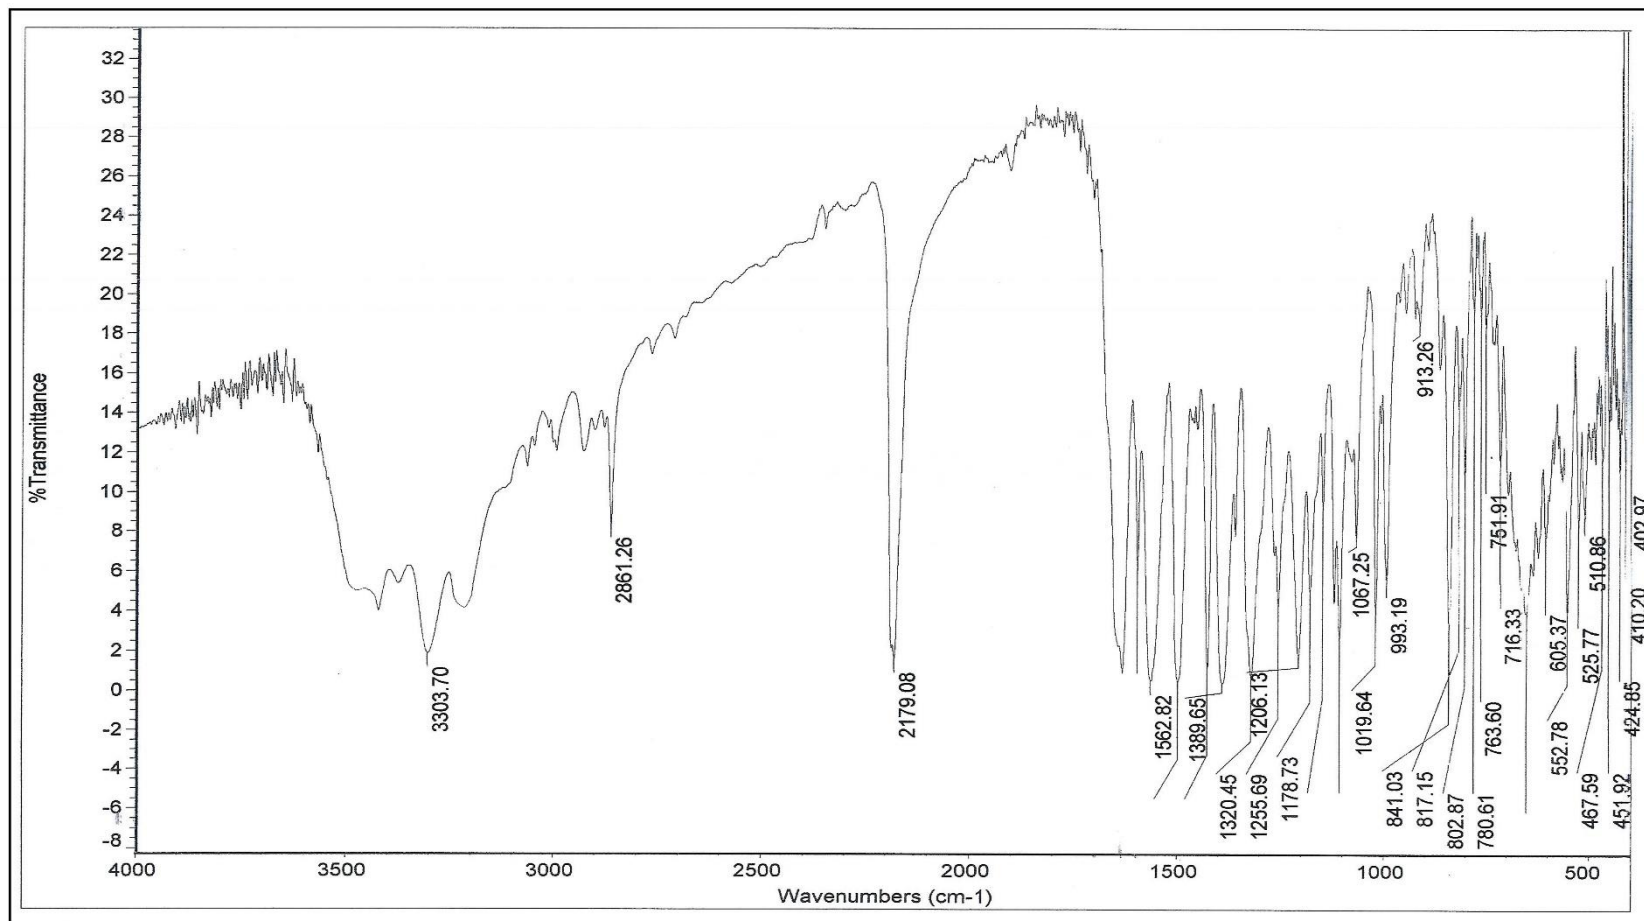

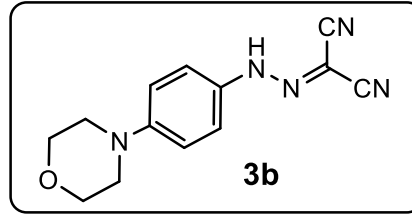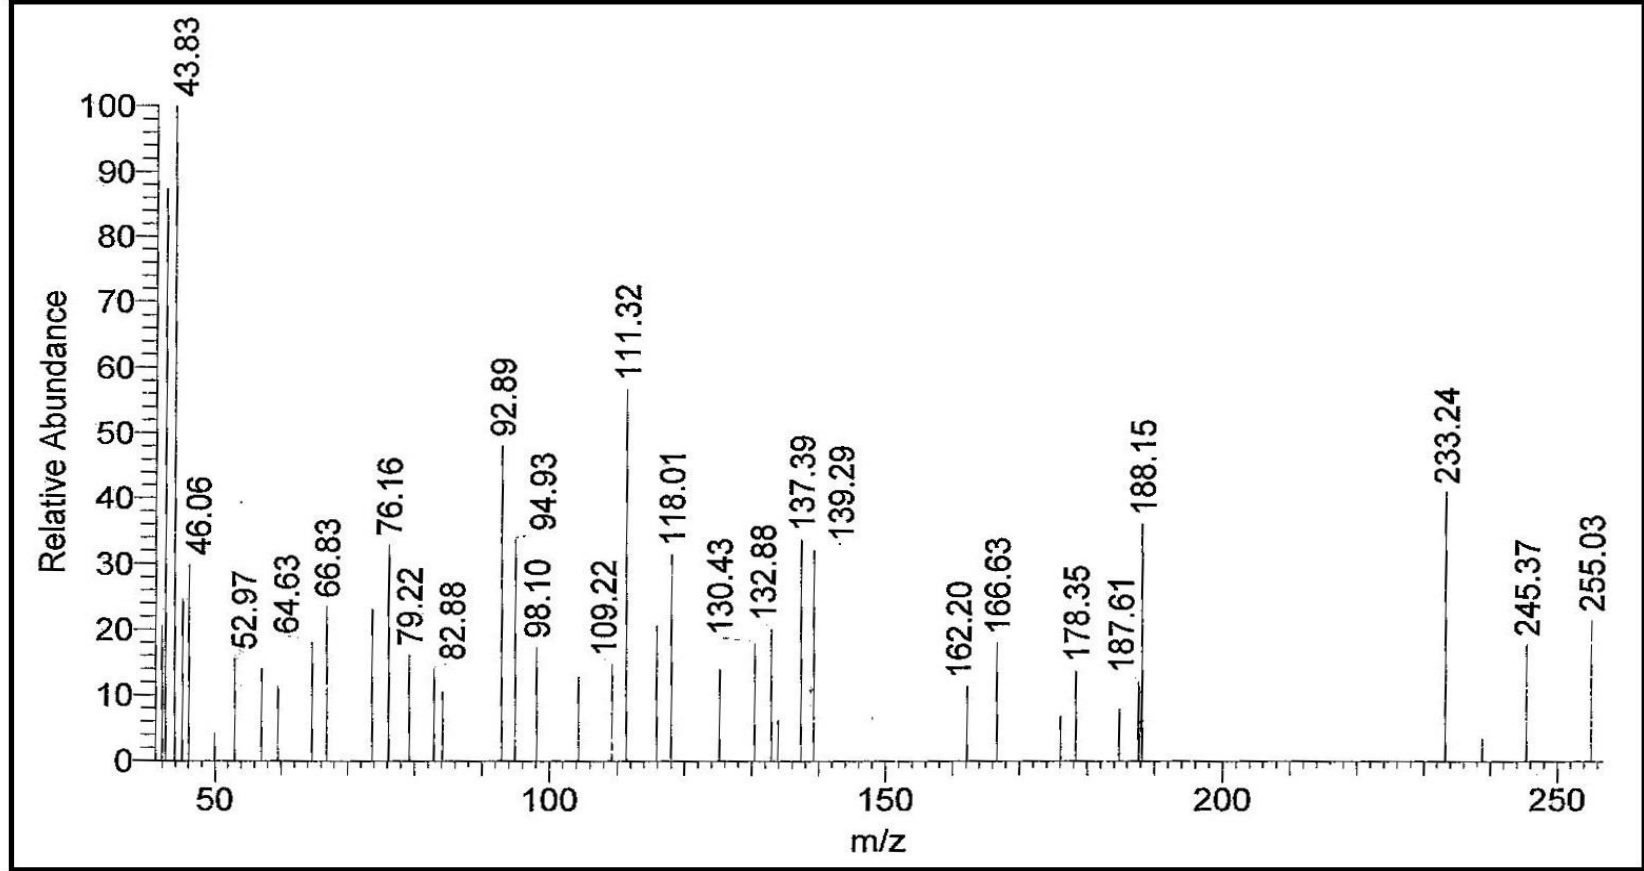

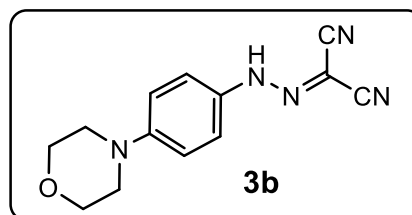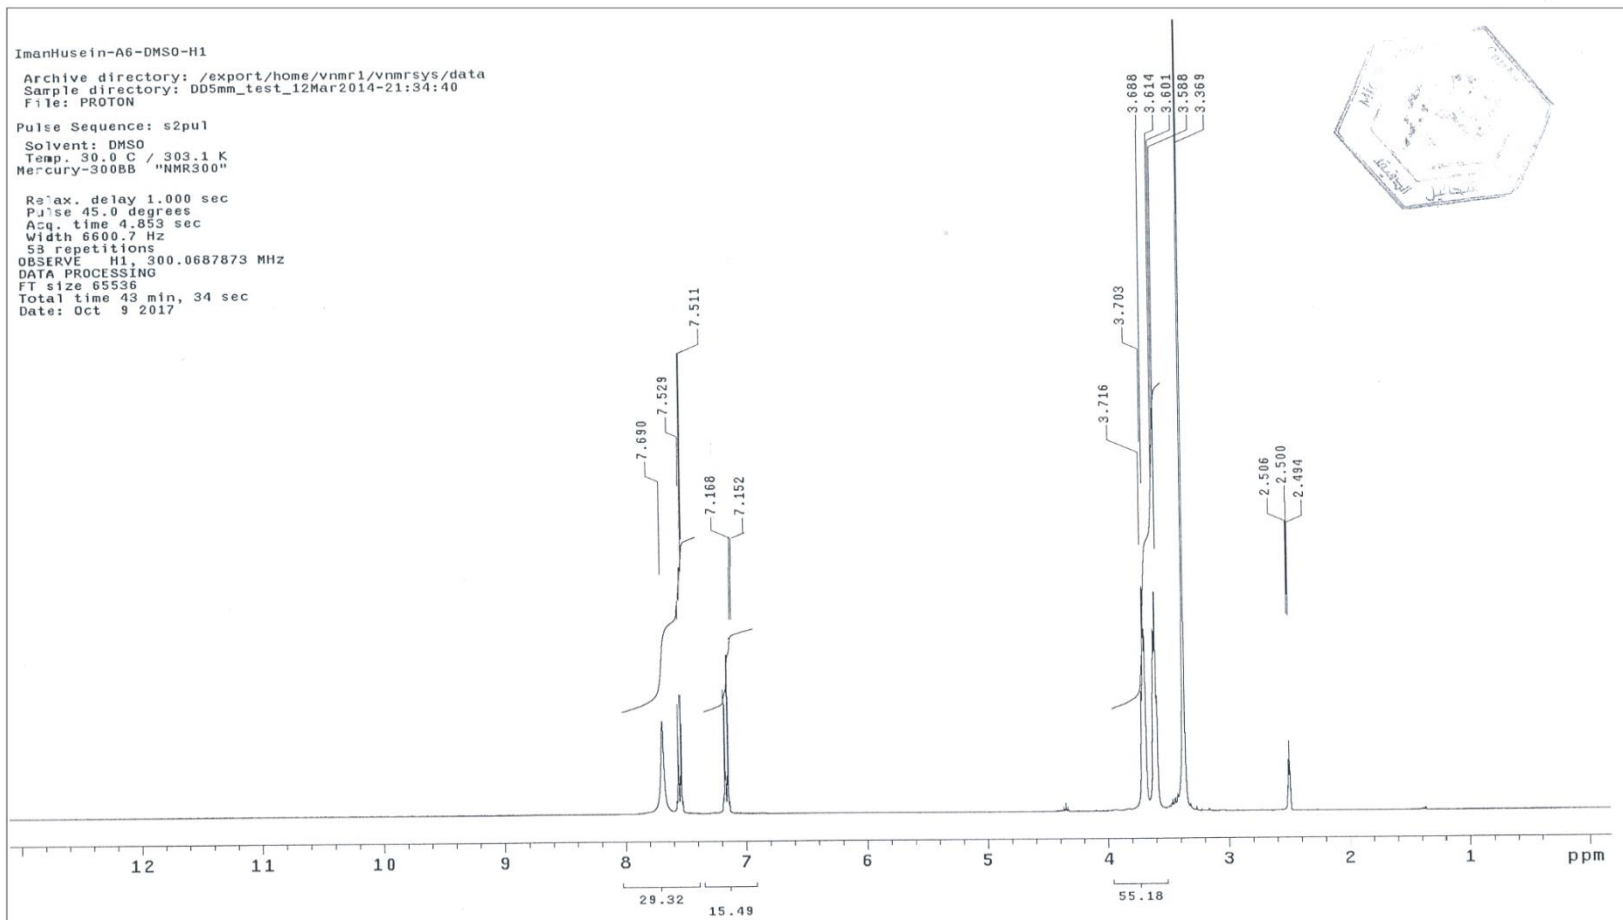

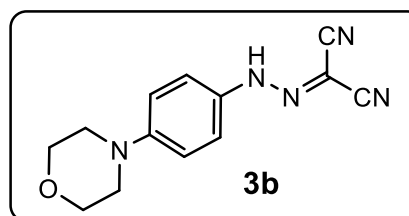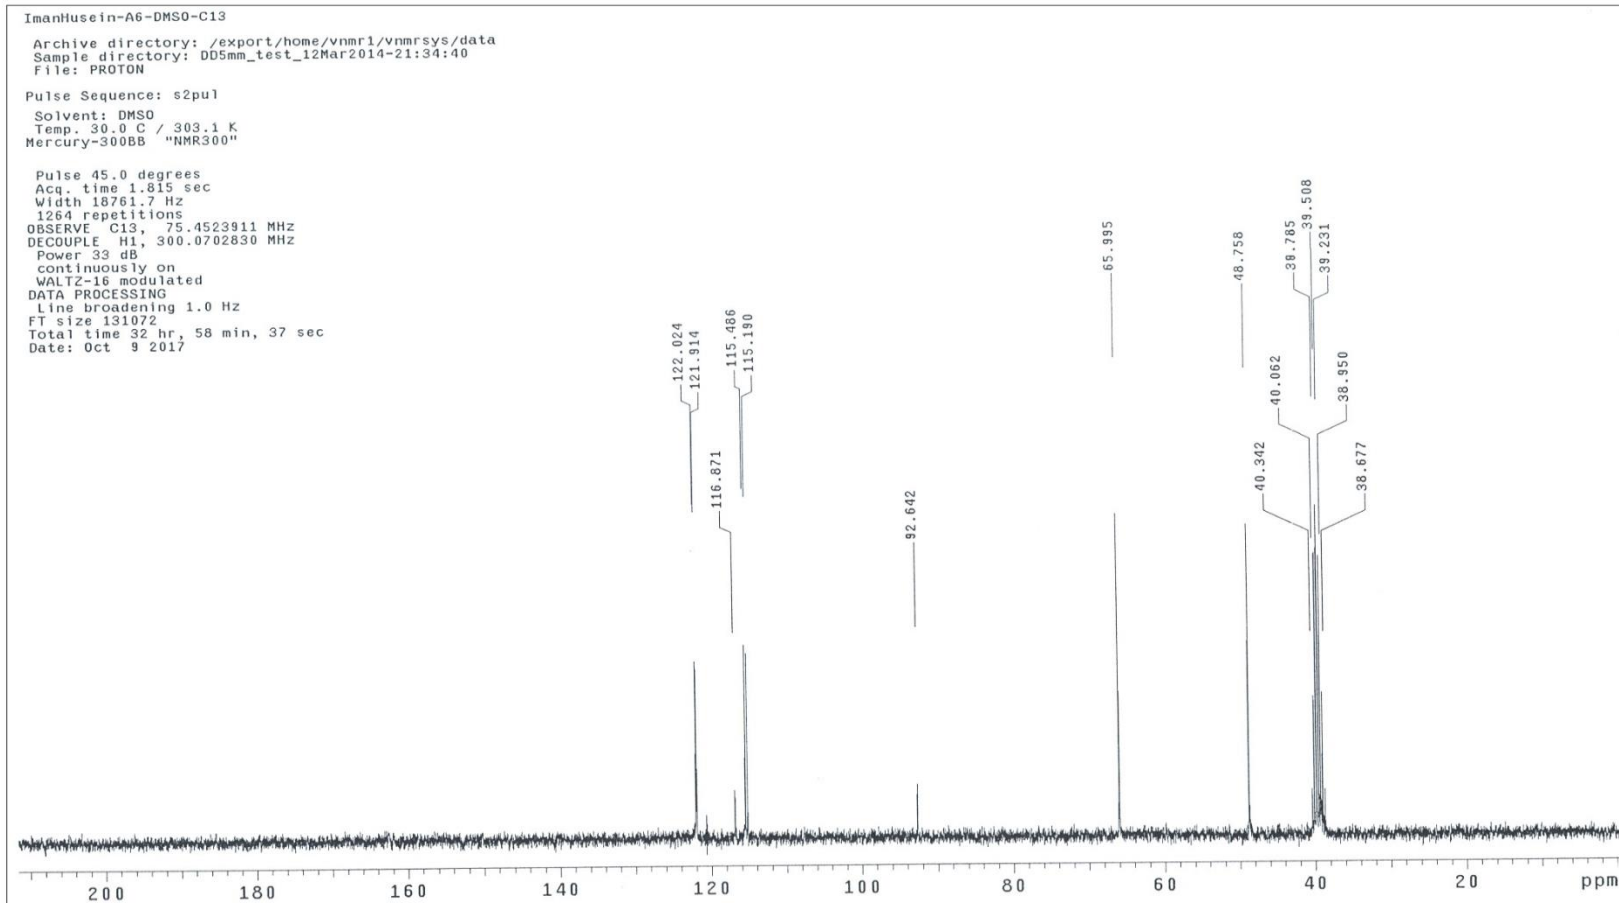

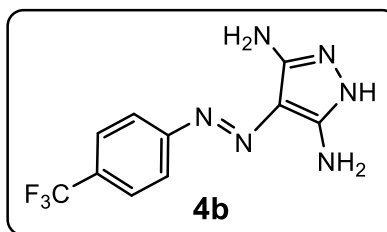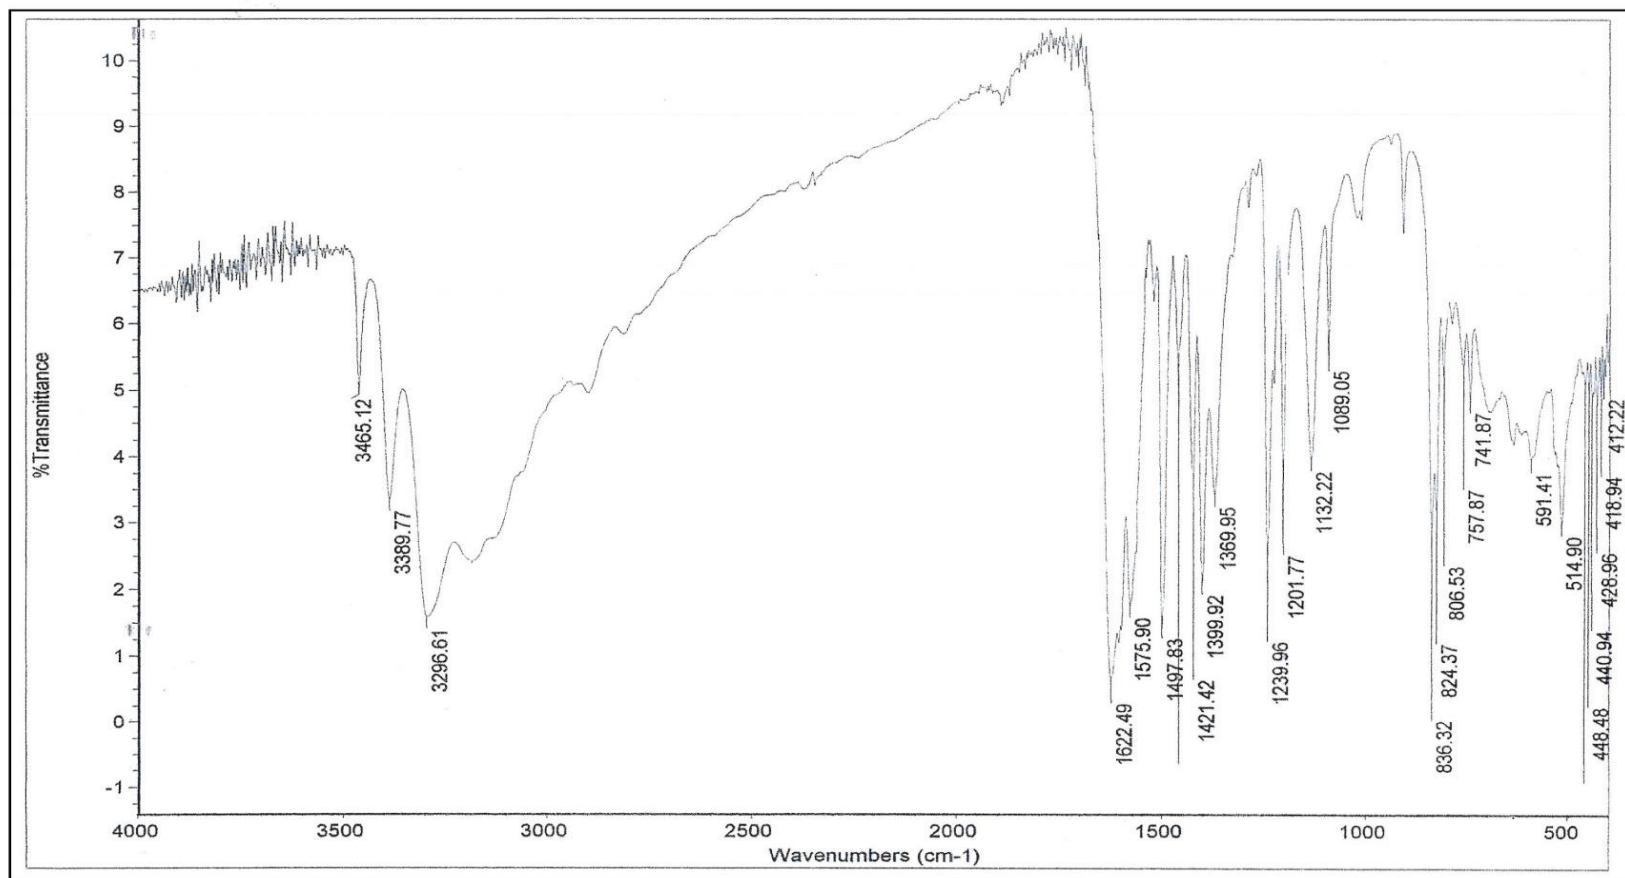

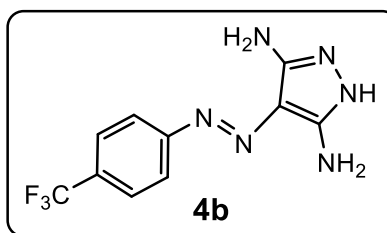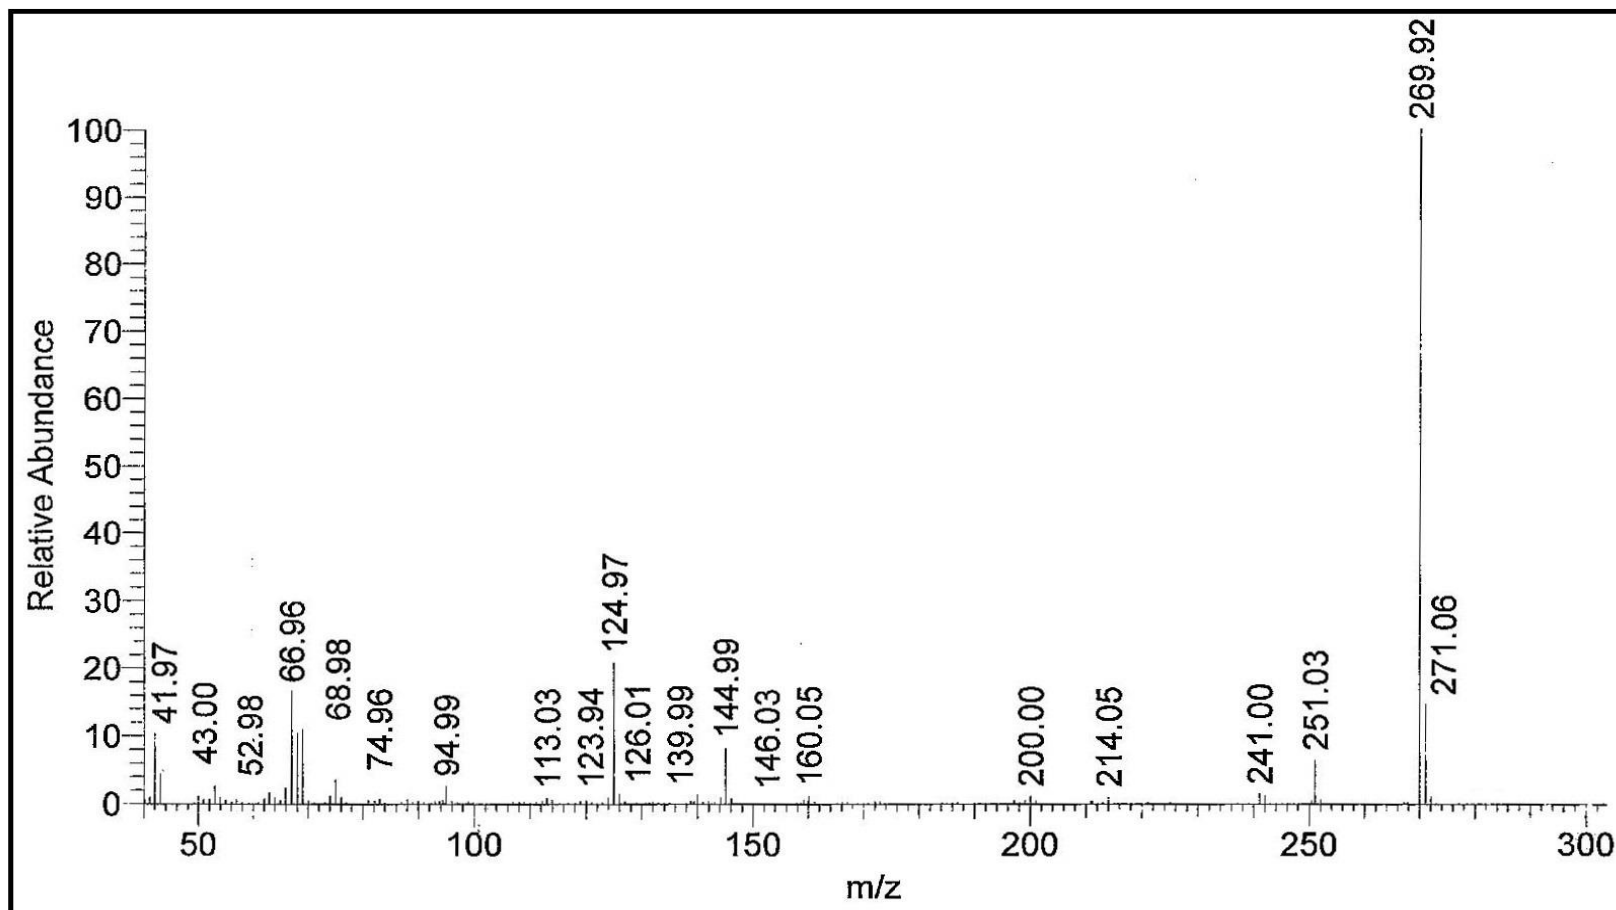

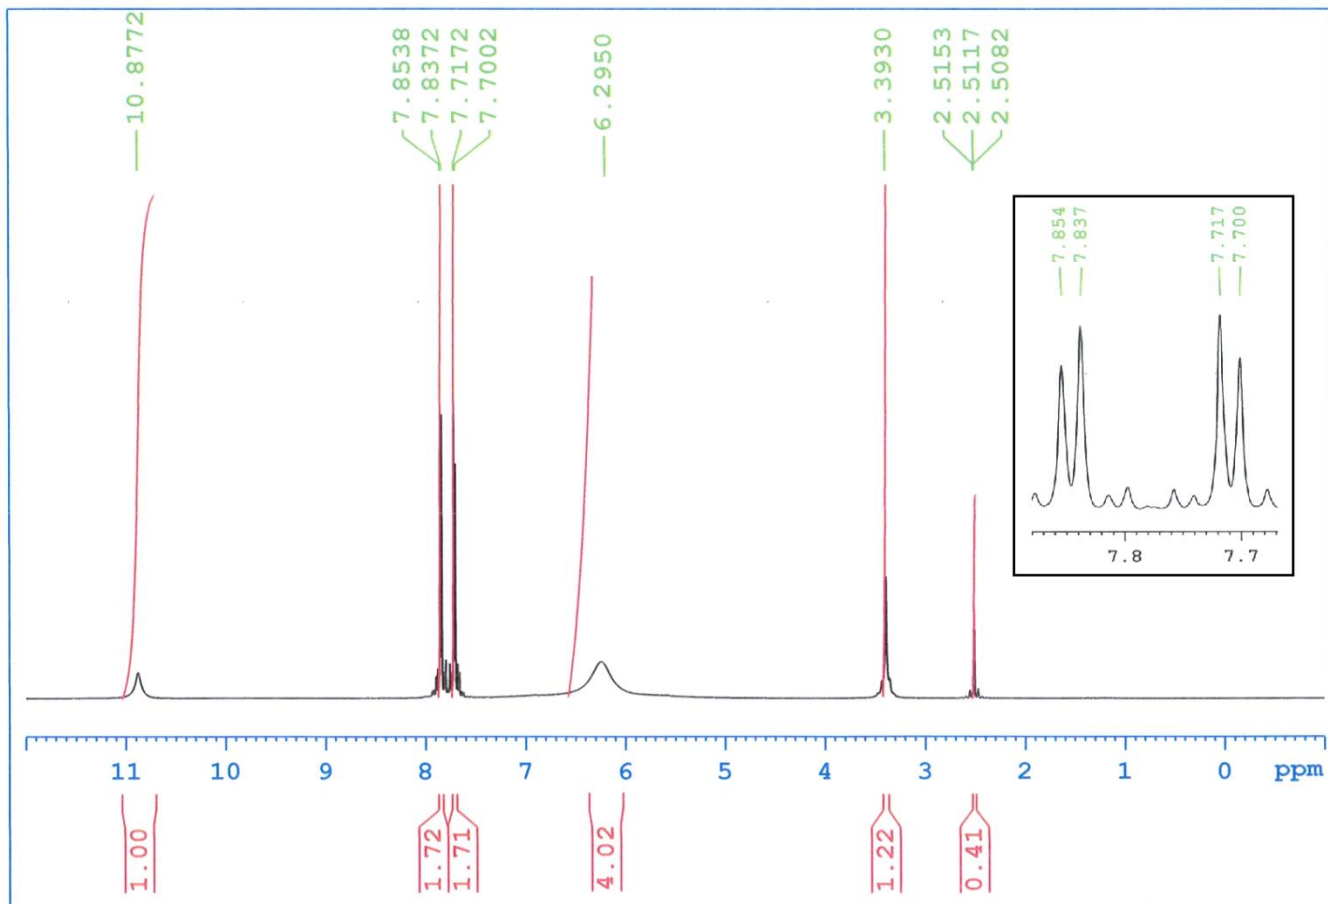

```

NAME      Mar28-2018-nmr
EXPNO     20
PROCNO    1
Date_     20180328
Time      14.50
INSTRUM   spect
PROBHD    5 mm PABBO BB-
PULPROG   zg30
TD         65536
SOLVENT   DMSO
NS         64
DS         2
SWH        10330.578 Hz
FIDRES     0.157632 Hz
AQ         3.1719923 sec
RG         181
DW         48.400 usec
DE         6.50 usec
TE         300.0 K
D1         1.00000000 sec
TDO        1

===== CHANNEL f1 =====
NUC1       1H
P1         14.56 usec
PL1        3.40 dB
PL1W       12.17042828 W
SFO1       500.1330885 MHz
SI         32768
SF         500.1300000 MHz
WDW        EM
SSB        0
LB         0.30 Hz
GB         0
PC         1.00
  
```



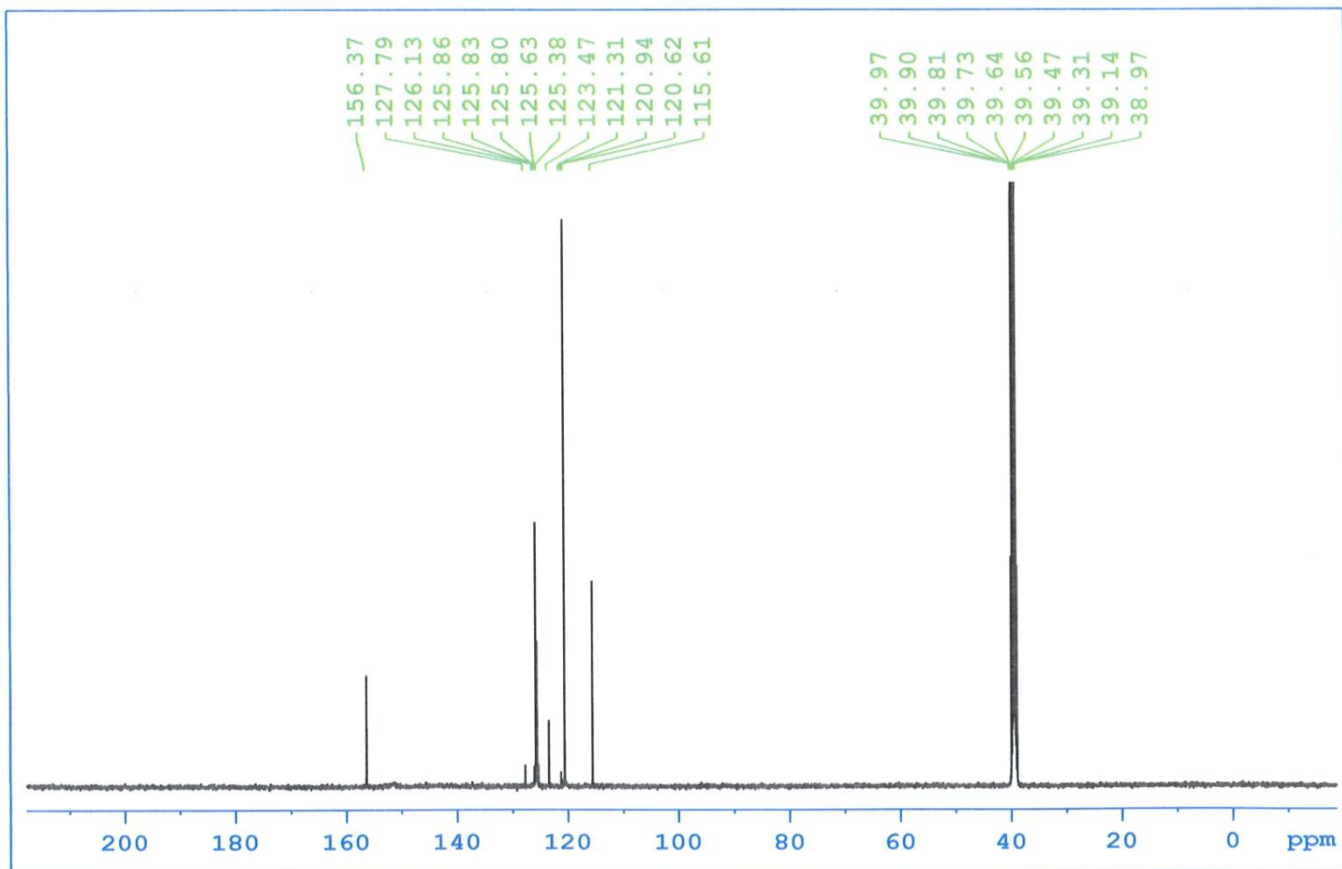

```

NAME      Mar28-2018-nmr
EXPNO     21
PROCNO    1
Date_     20180328
Time      16.00
INSTRUM   spect
PROBHD    5 mm PABBO BB-
PULPROG   zgpg30
TD         65536
SOLVENT   DMSO
NS         1280
DS         4
SWH        29761.904 Hz
FIDRES     0.454131 Hz
AQ         1.1010548 sec
RG         203
DW         16.800 usec
DE         6.50 usec
TE         300.0 K
D1         2.00000000 sec
D11        0.03000000 sec
TD0        1

```

```

===== CHANNEL f1 =====
NUC1      13C
P1        9.80 usec
PL1       0.90 dB
PL1W      70.43995667 W
SFO1     125.7703643 MHz

```

```

===== CHANNEL f2 =====
CPDPRG2   waltz16
NUC2      1H
PCPD2     80.00 usec
PL2       3.40 dB
PL12      18.20 dB
PL13      19.66 dB
PL2W      12.17042828 W
PL12W     0.40300068 W
PL13W     0.28794256 W
SFO2     500.1320005 MHz
SI        32768
SF        125.7578519 MHz
WDW       EM
SSB       0
LB        1.00 Hz
GB        0
PC        1.40

```

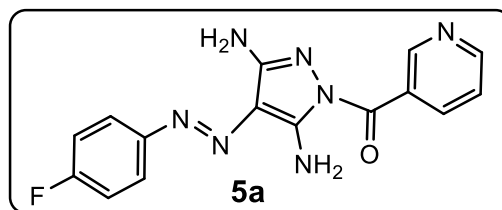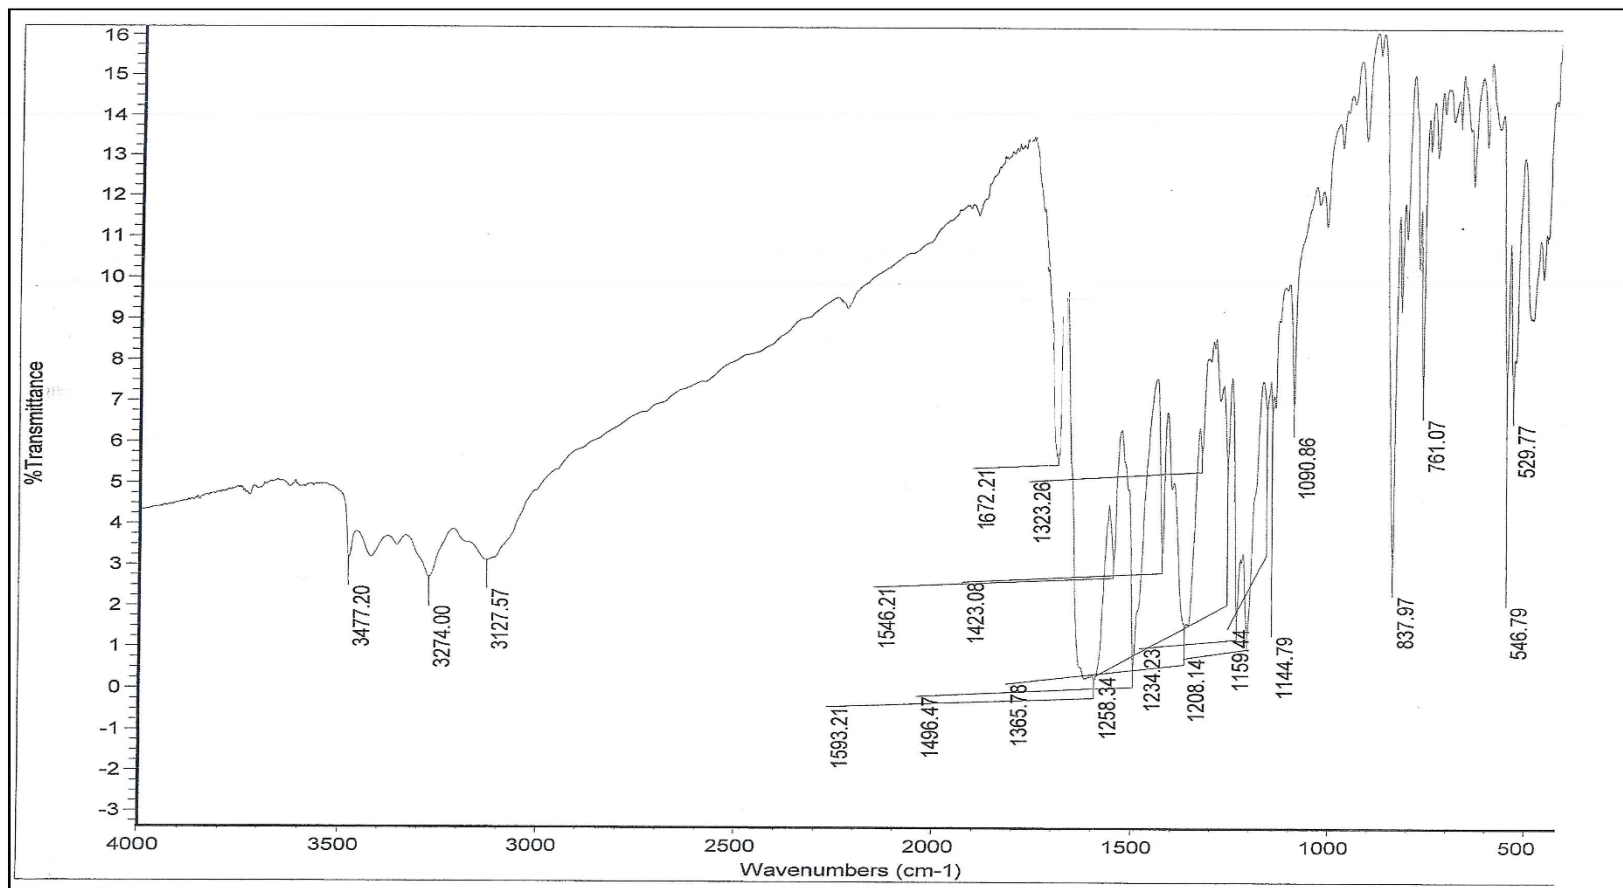

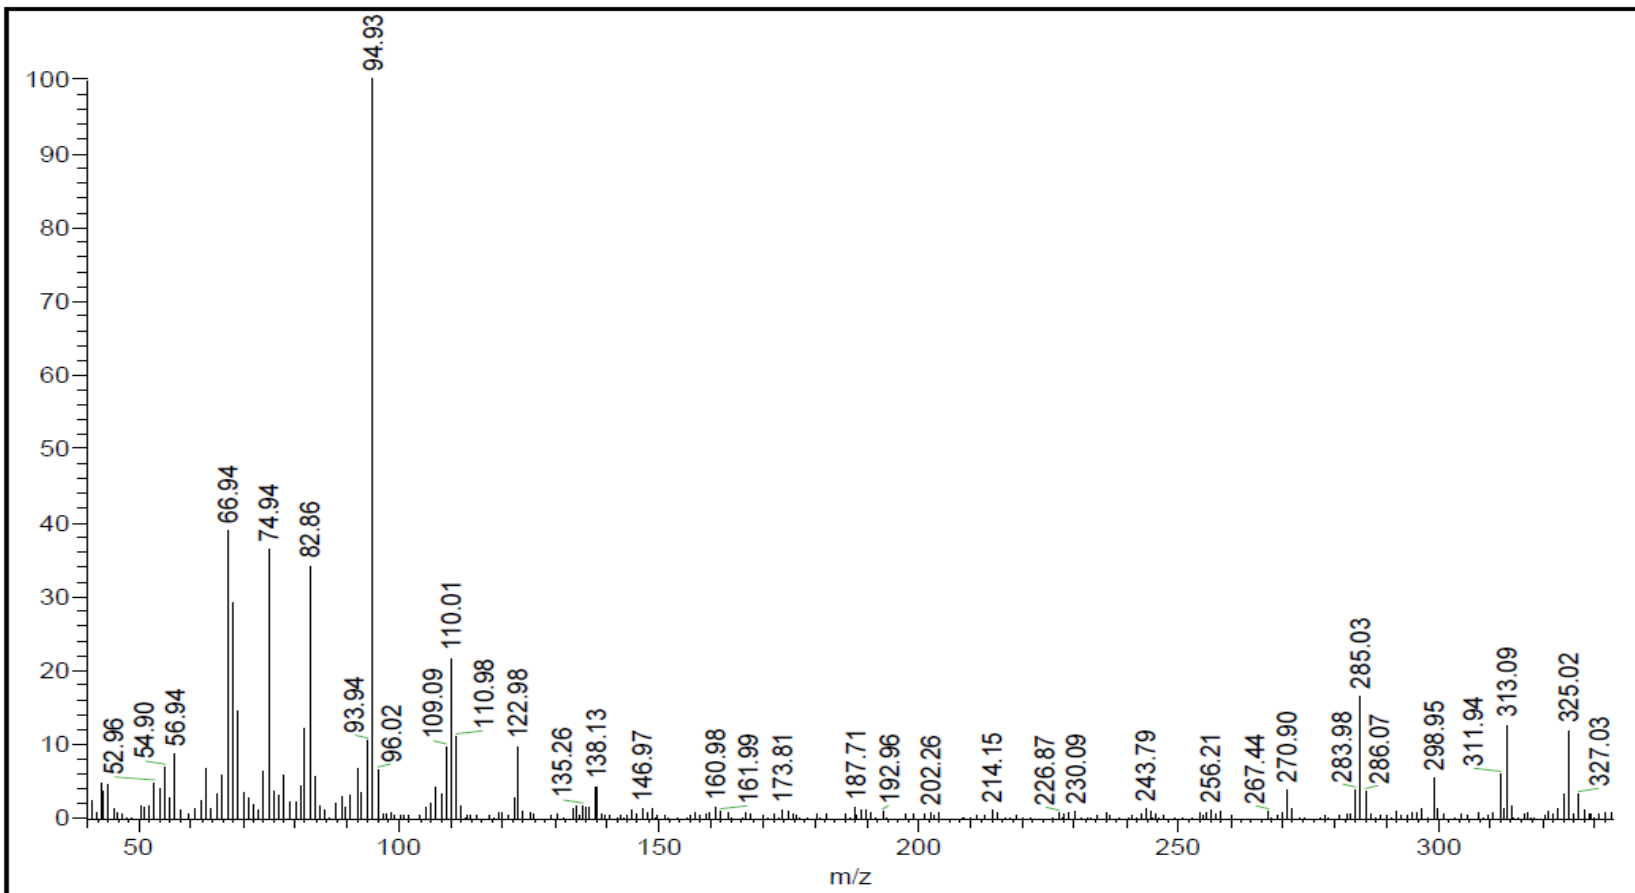

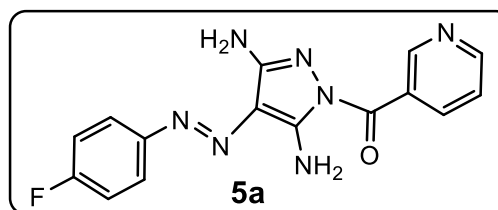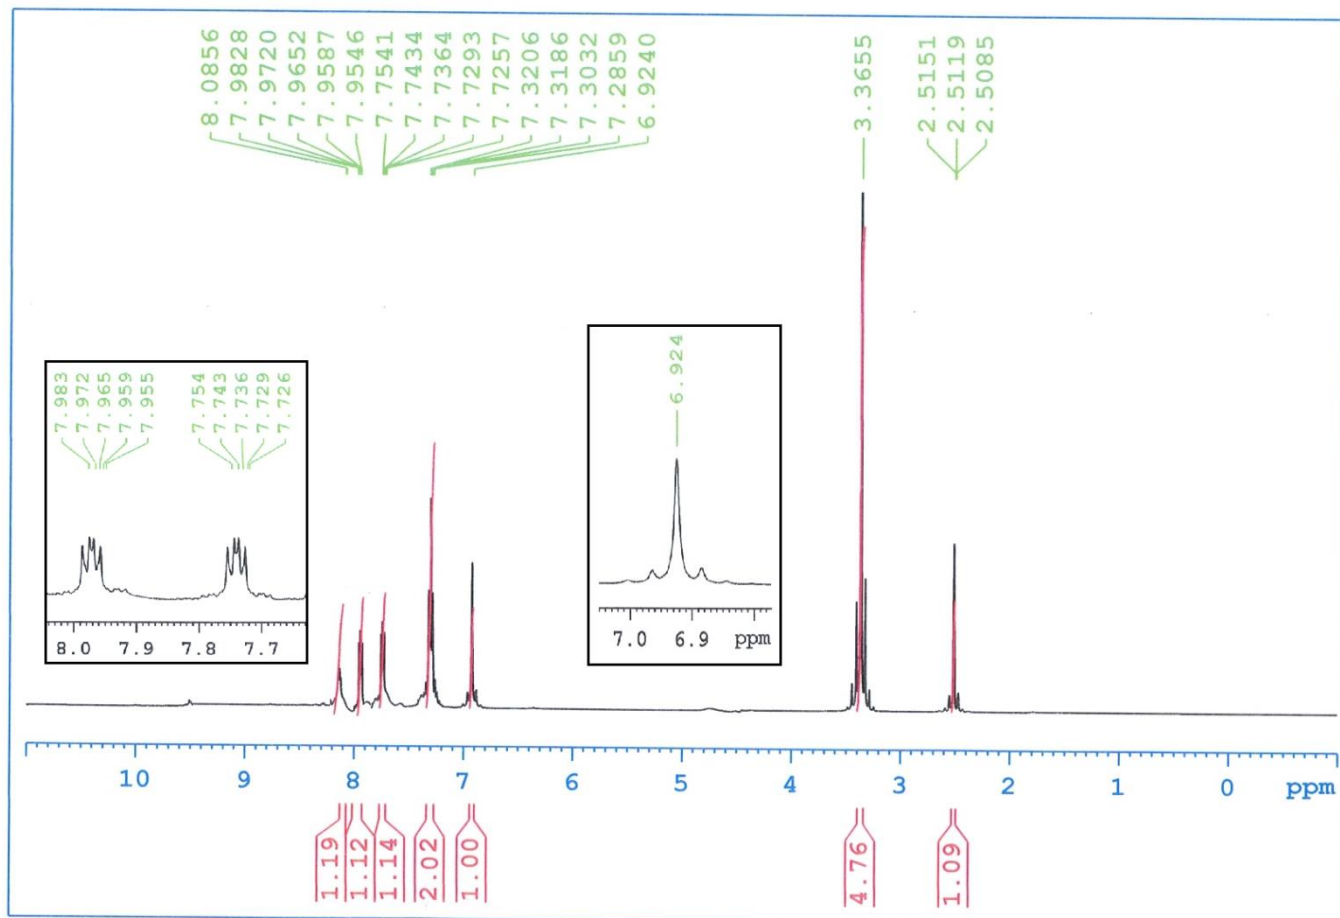

```

NAME      Mar28-2018-nmr
EXPNO     10
PROCNO    1
Date_     20180328
Time      13.13
INSTRUM   spect
PROBHD    5 mm PABBO BB-
PULPROG   zg30
TD         65536
SOLVENT   DMSO
NS         64
DS         2
SWH       10330.578 Hz
FIDRES    0.157632 Hz
AQ         3.1719923 sec
RG         203
DW         48.400 usec
DE         6.50 usec
TE         300.0 K
D1         1.00000000 sec
TDO        1

```

```

===== CHANNEL f1 =====
NUC1      1H
P1        14.56 usec
PL1       3.40 dB
PL1W      12.17042828 W
SFO1      500.1330885 MHz
SI         32768
SF         500.1300000 MHz
WDW       EM
SSB       0
LB        0.30 Hz
GB         0
PC         1.00

```

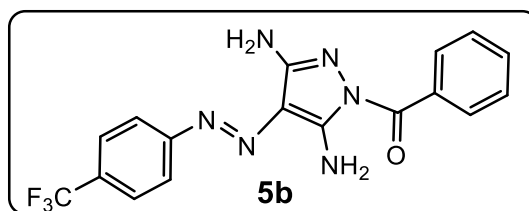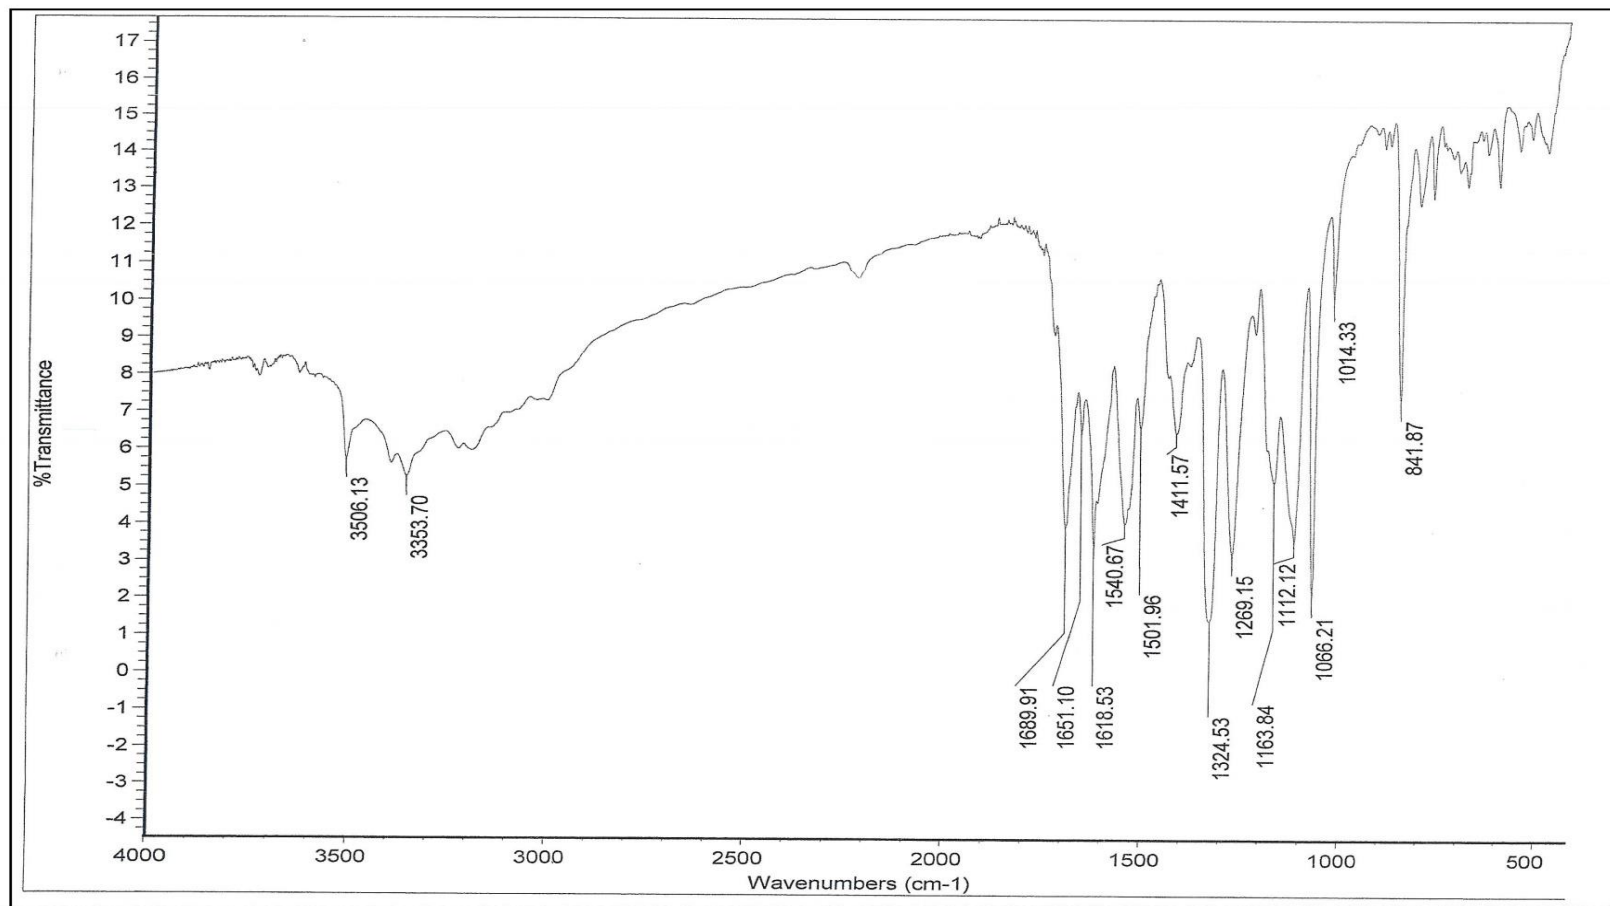

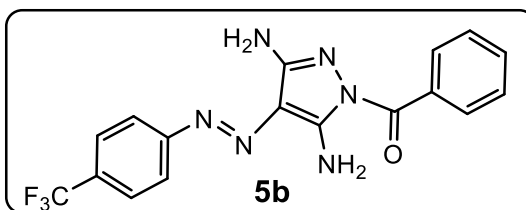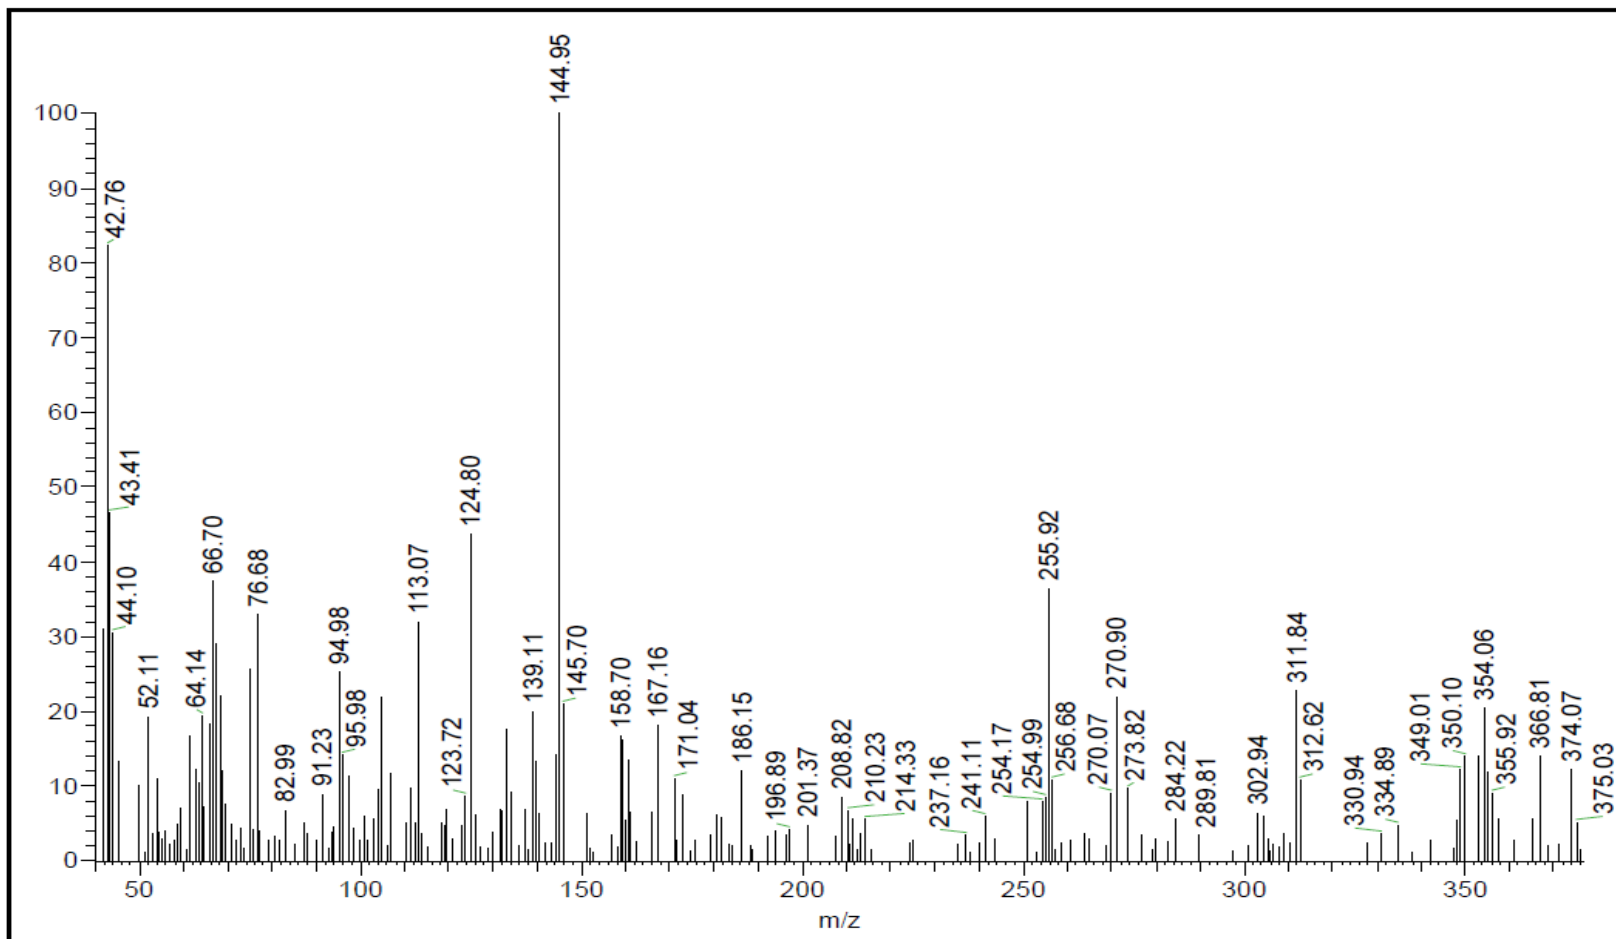

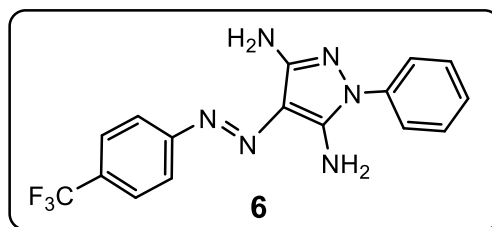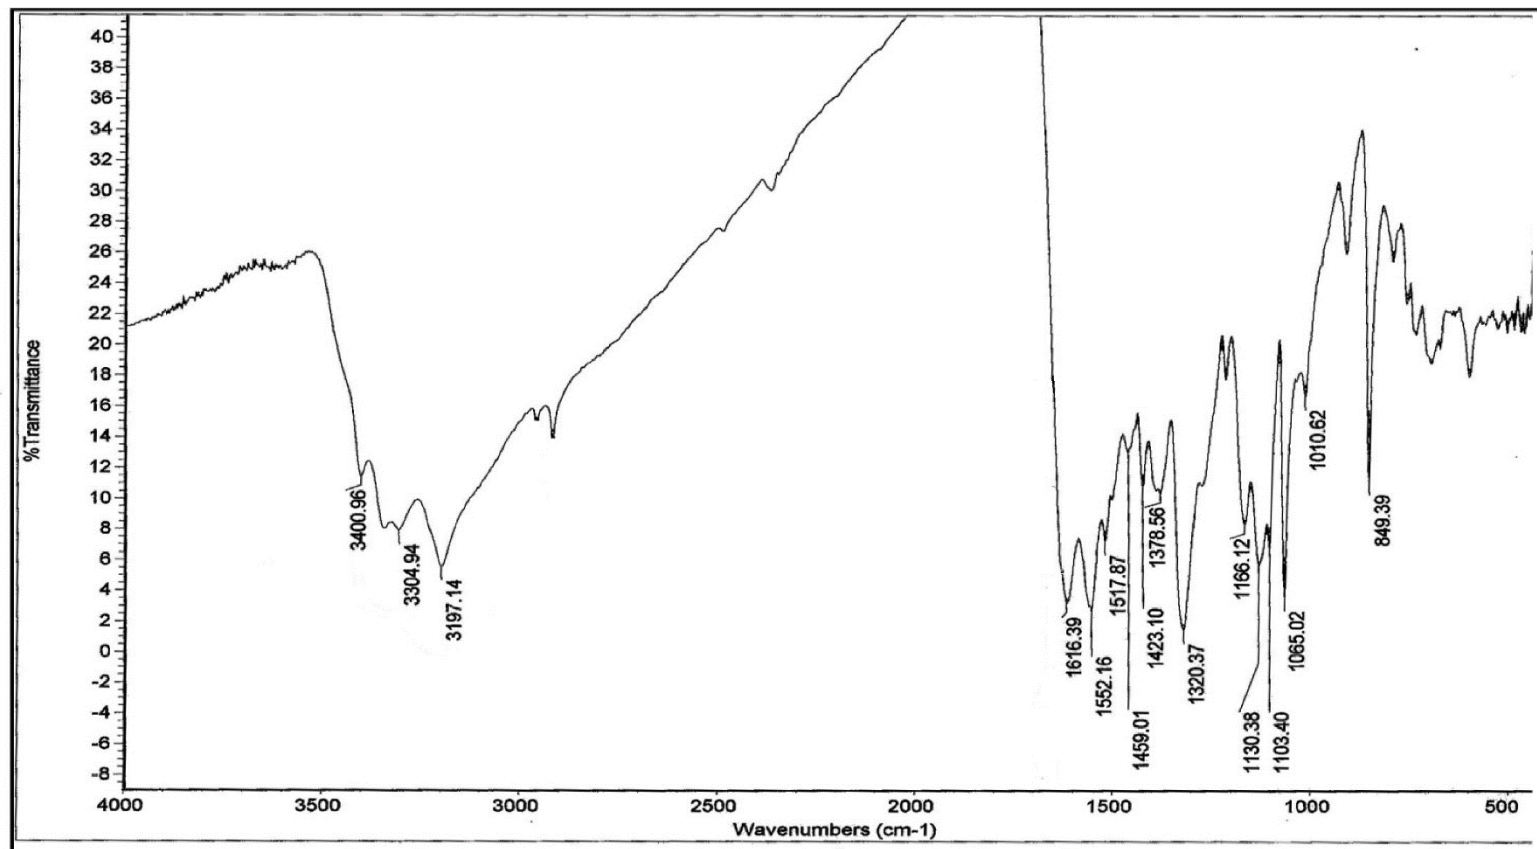

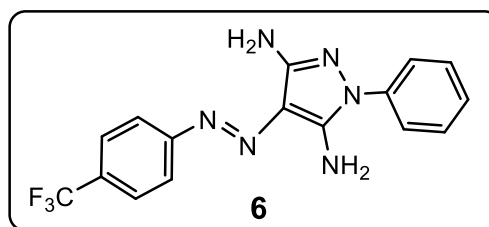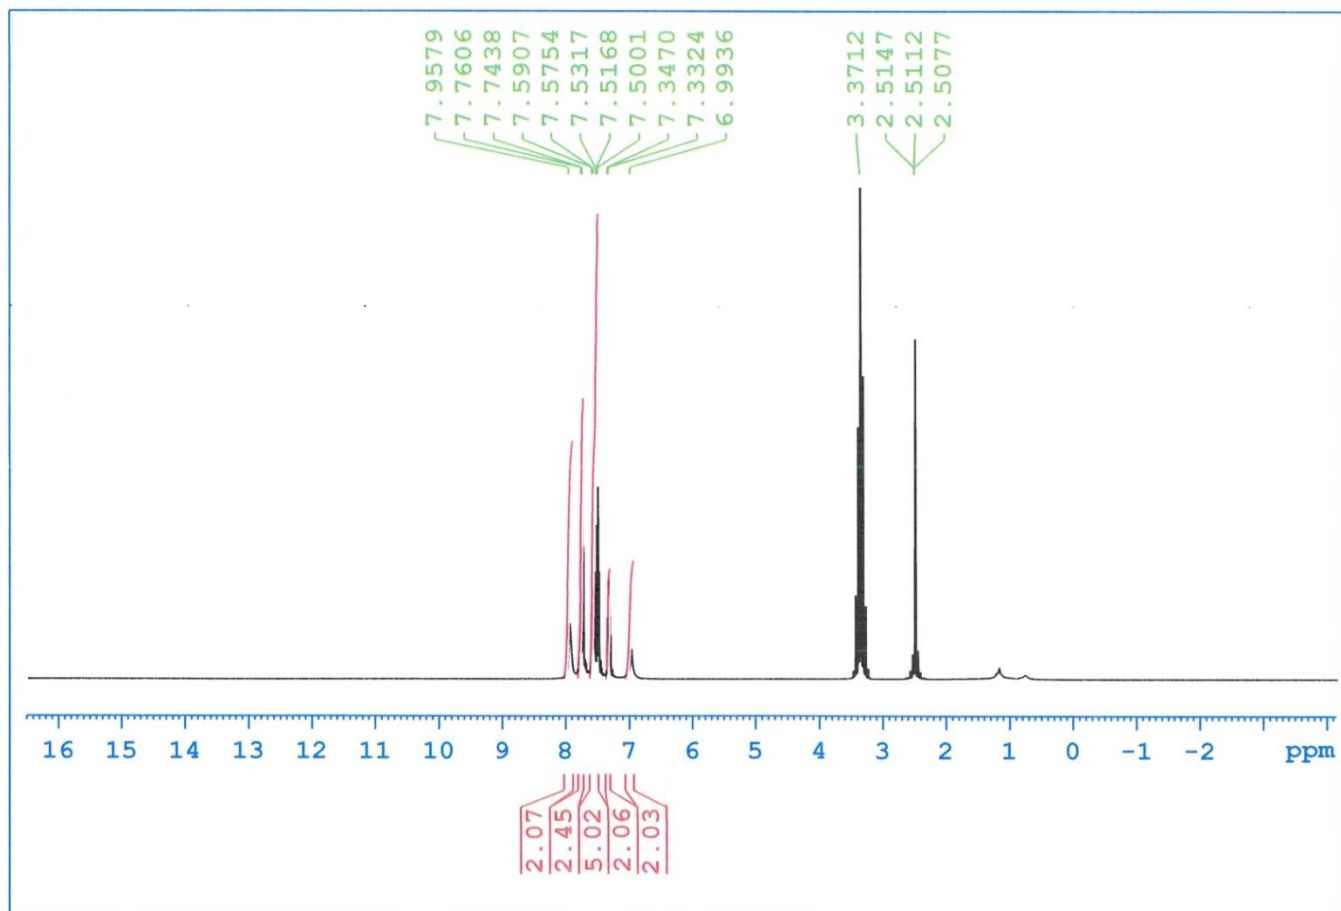

```

NAME      Mar28-2018-nmr
EXPNO     21
PROCNO    1
Date_     20180328
Time      16.00
INSTRUM   spect
PROBHD    5 mm PABBO BB-
PULPROG   zgpg30
TD         65536
SOLVENT   DMSO
NS         1280
DS         4
SWH       29761.904 Hz
FIDRES    0.454131 Hz
AQ         1.1010548 sec
RG         203
DW         16.800 usec
DE         6.50 usec
TE         300.0 K
D1         2.00000000 sec
D11        0.03000000 sec
TD0        1

```

```

===== CHANNEL f1 =====
NUC1      13C
P1         9.80 usec
PL1        0.90 dB
PL1W      70.43995667 W
SFO1      125.7703643 MHz

```

```

===== CHANNEL f2 =====
CPDPRG2   waltz16
NUC2      1H
PCPD2     80.00 usec
PL2        3.40 dB
PL12       18.20 dB
PL13       19.66 dB
PL2W      12.17042828 W
PL12W     0.40300068 W
PL13W     0.28794256 W
SFO2      500.1320005 MHz
S1         32768
SF         125.7578519 MHz
WDW        EM
SSB        0
LB         1.00 Hz
GB         0
PC         1.40

```



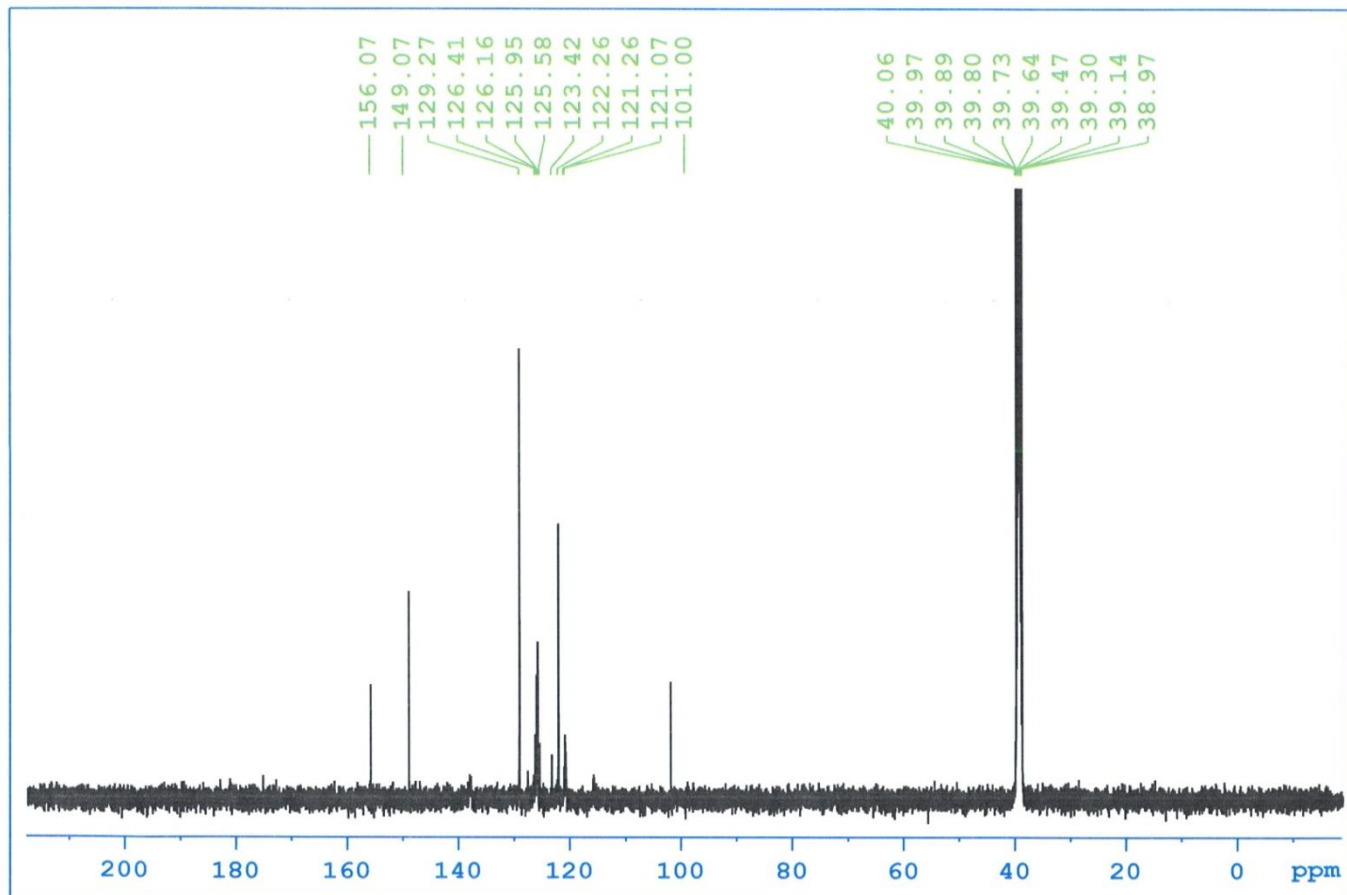

```

NAME      Mar28-2018-nmr
EXPNO    21
PROCNO   1
Date_    20180328
Time     16.00
INSTRUM  spect
PROBHD   5 mm PABBO BB-
PULPROG  zgpg30
TD       65536
SOLVENT  DMSO
NS       1280
DS       4
SWH      29761.904 Hz
FIDRES   0.454131 Hz
AQ       1.1010548 sec
RG       203
DW       16.800 usec
DE       6.50 usec
TE       300.0 K
D1       2.00000000 sec
D11      0.03000000 sec
TD0      1

===== CHANNEL f1 =====
NUC1     13C
P1       9.80 usec
PL1      0.90 dB
PL1W    70.43995667 W
SFO1    125.7703643 MHz

===== CHANNEL f2 =====
CPDPRG2  waltz16
NUC2     1H
PCPD2    80.00 usec
PL2      3.40 dB
PL12     18.20 dB
PL13     19.66 dB
PL2W    12.17042828 W
PL12W   0.40300068 W
PL13W   0.28794256 W
SFO2    500.1320005 MHz
SI       32768
SF      125.7578519 MHz
WDW      EM
SSB      0
LB       1.00 Hz
GB       0
PC       1.40

```

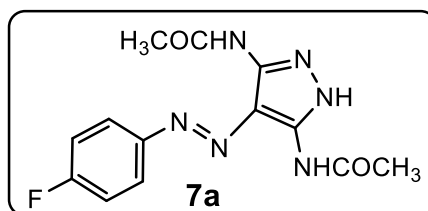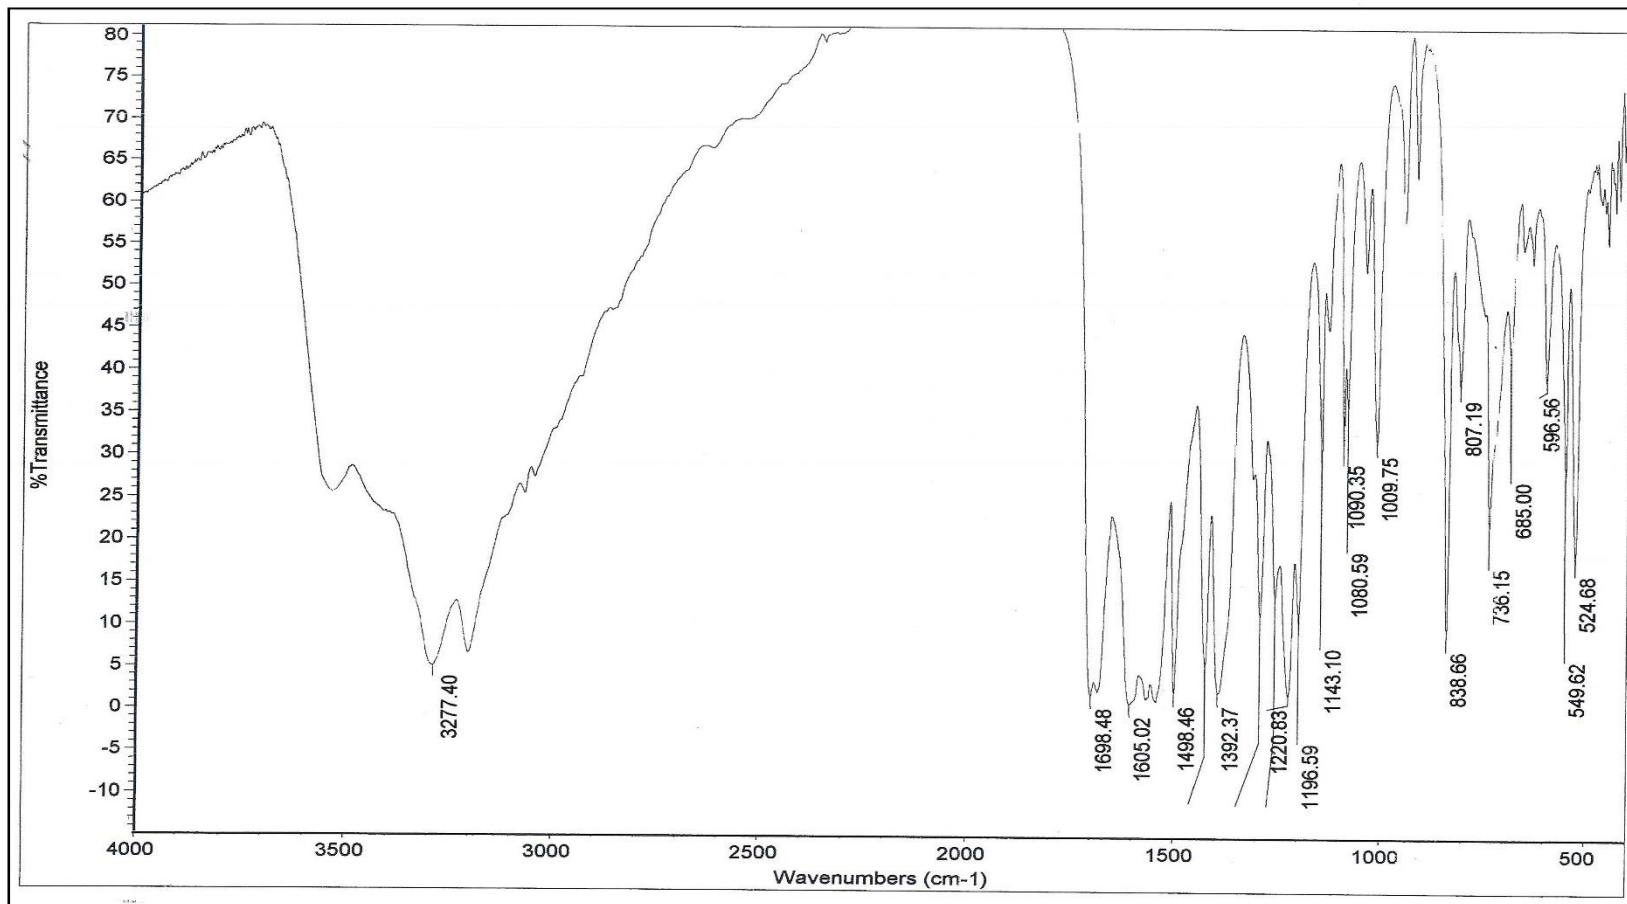

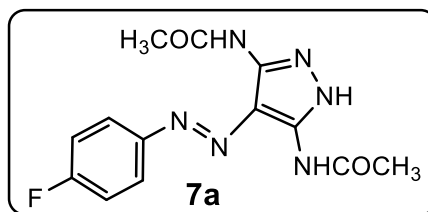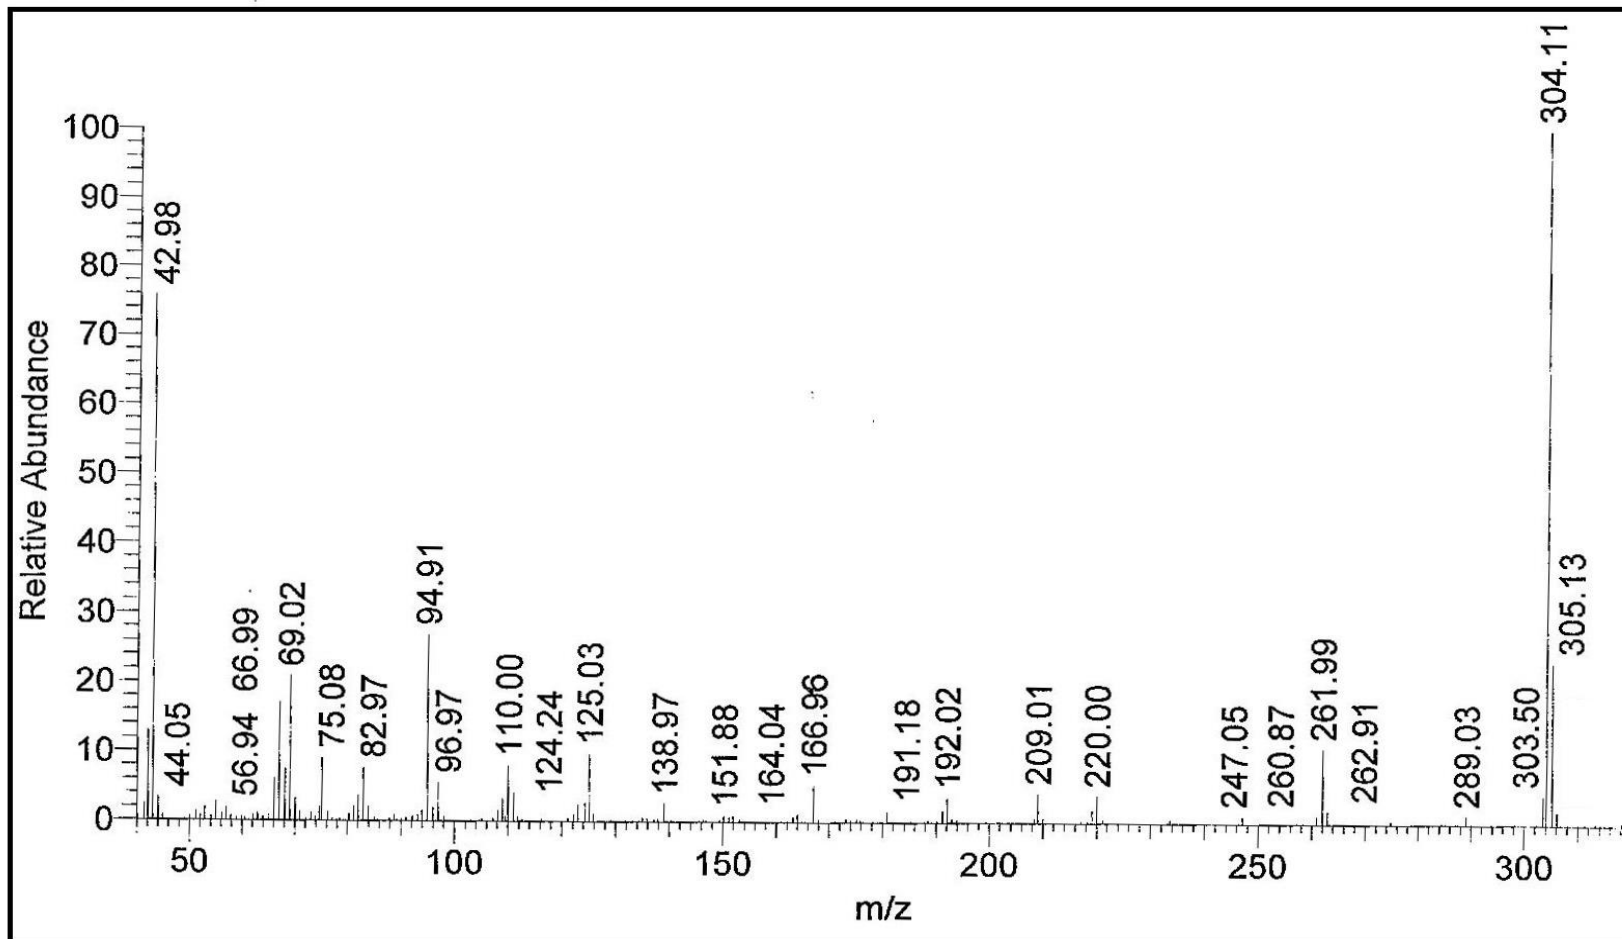

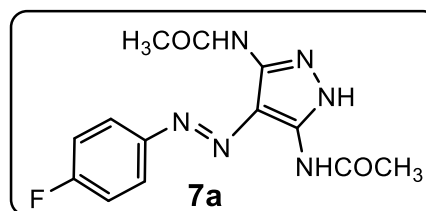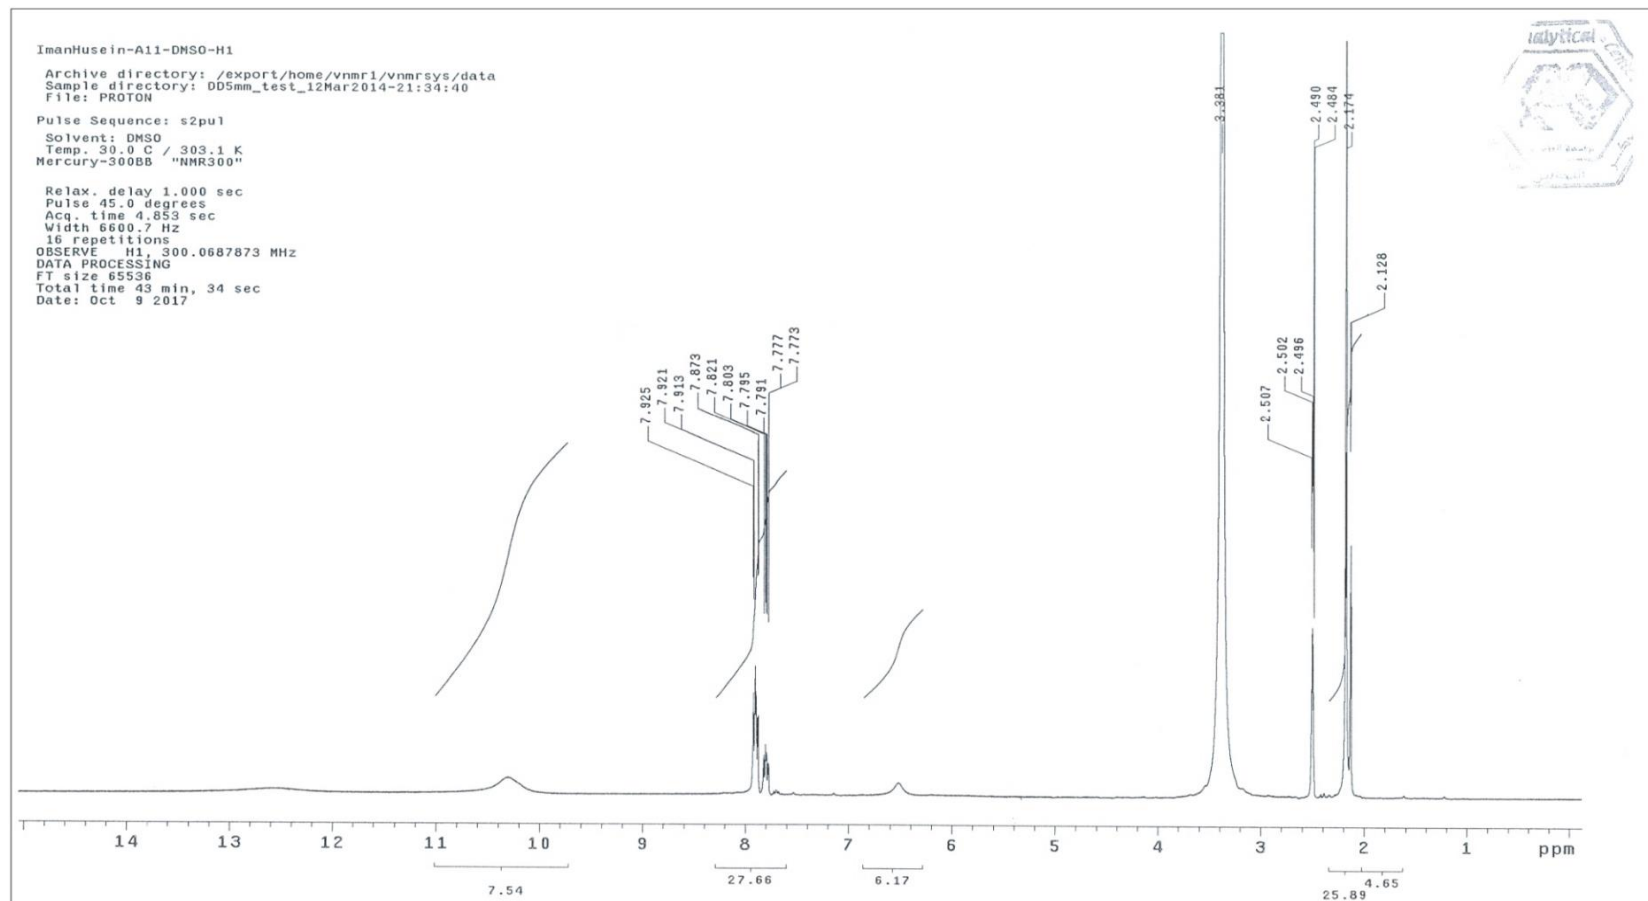

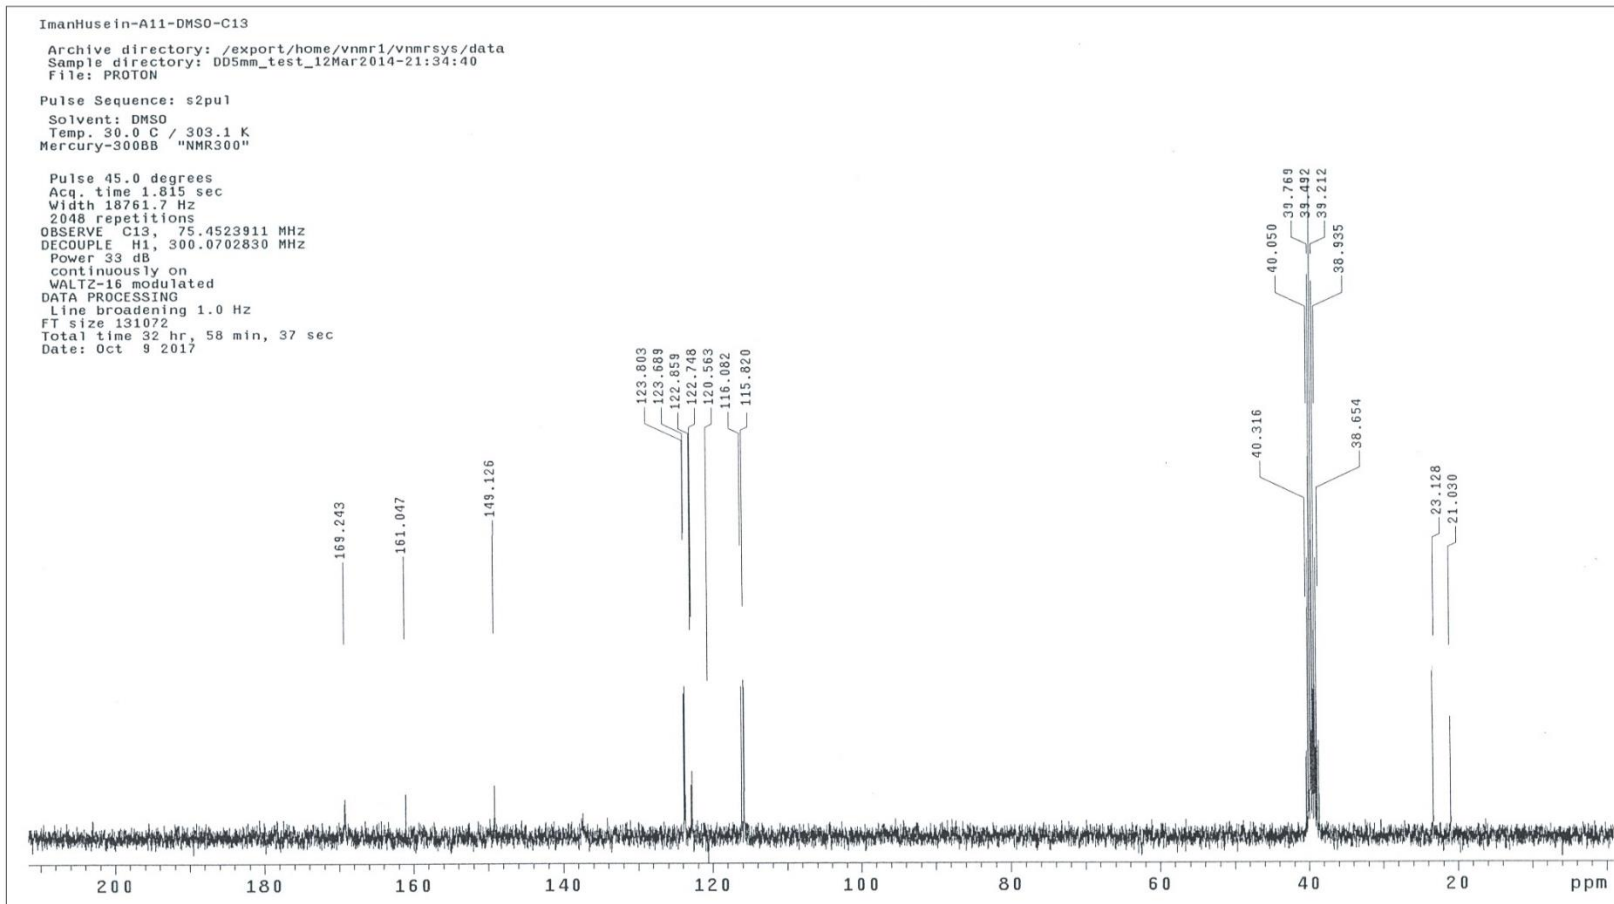

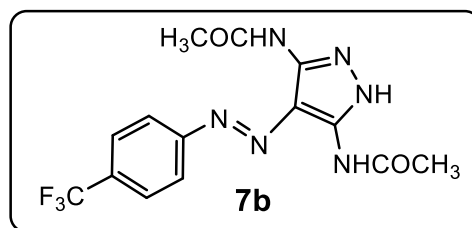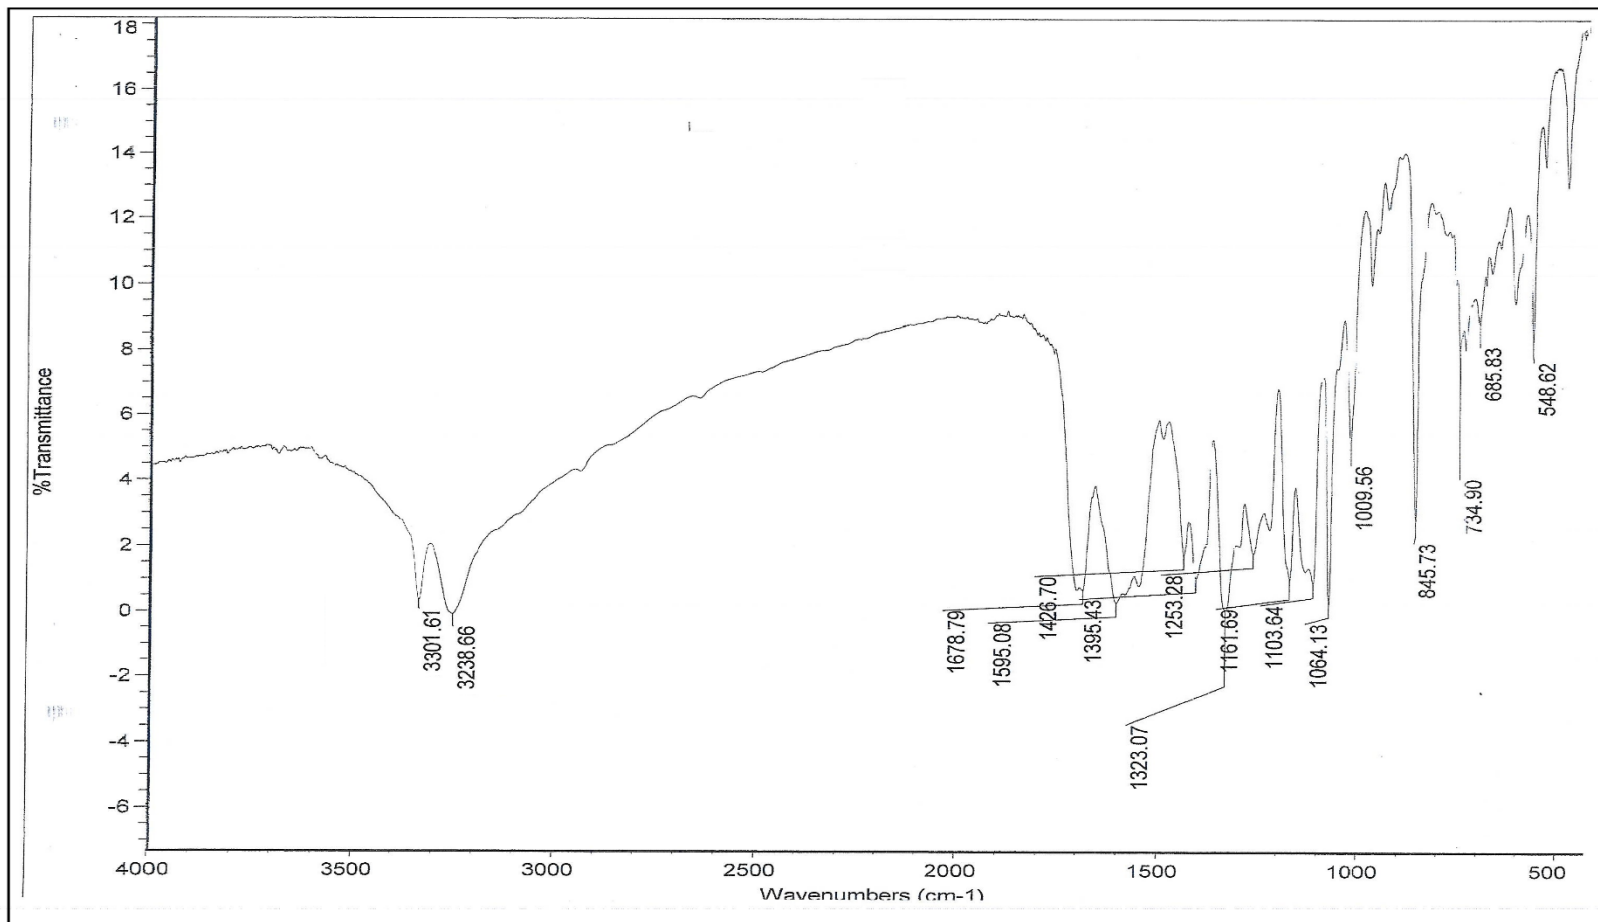

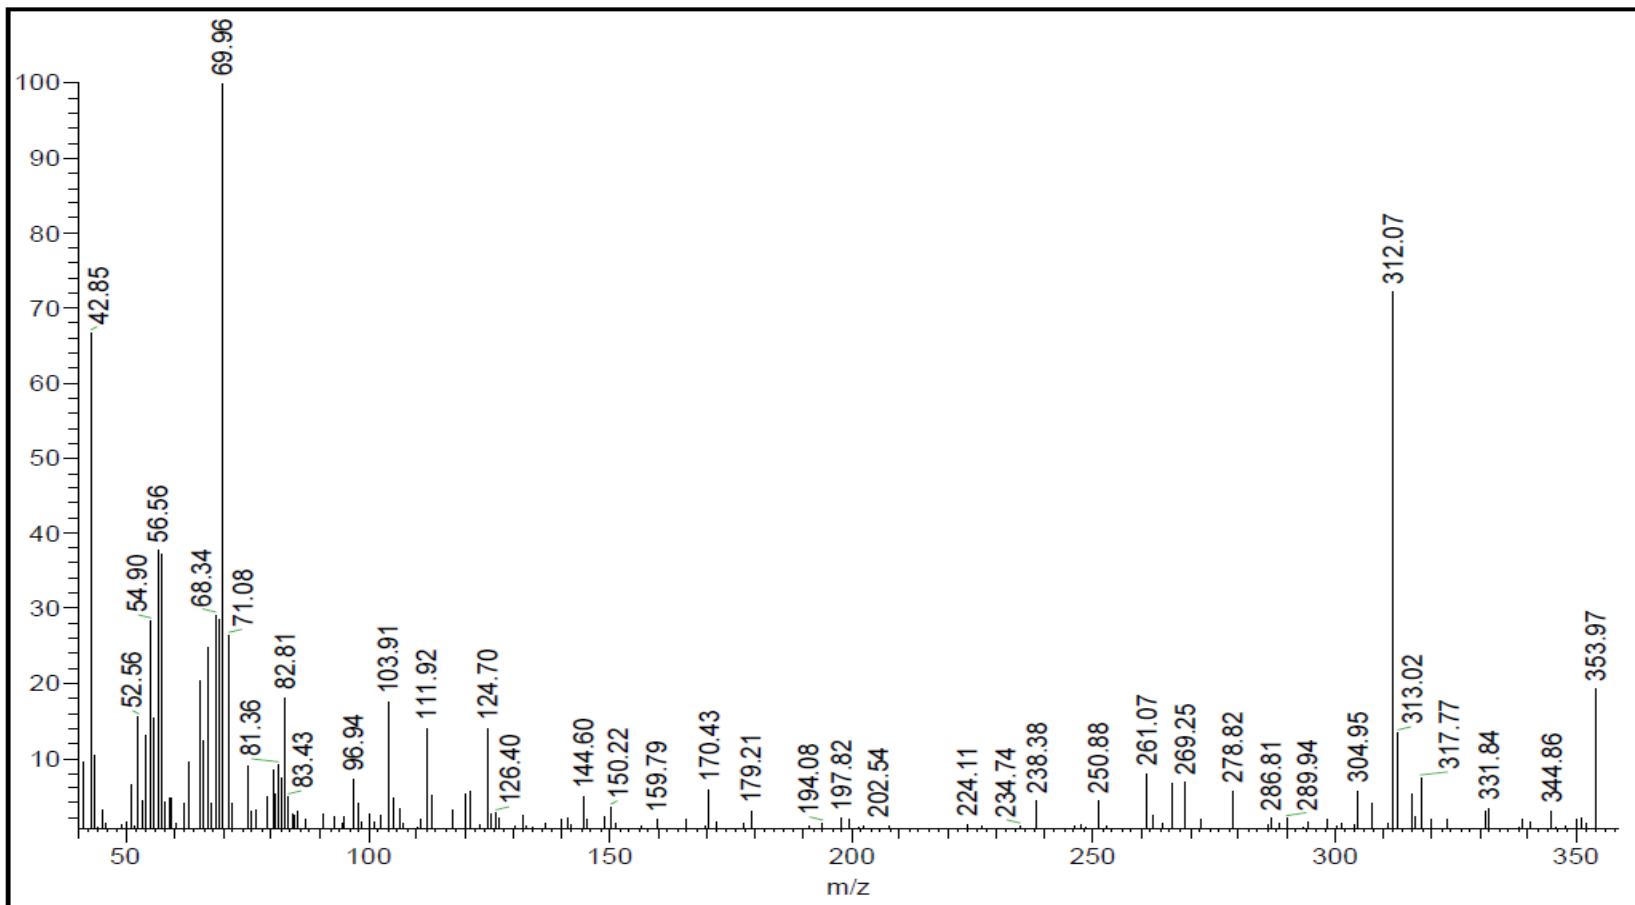

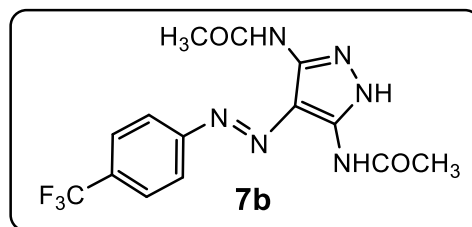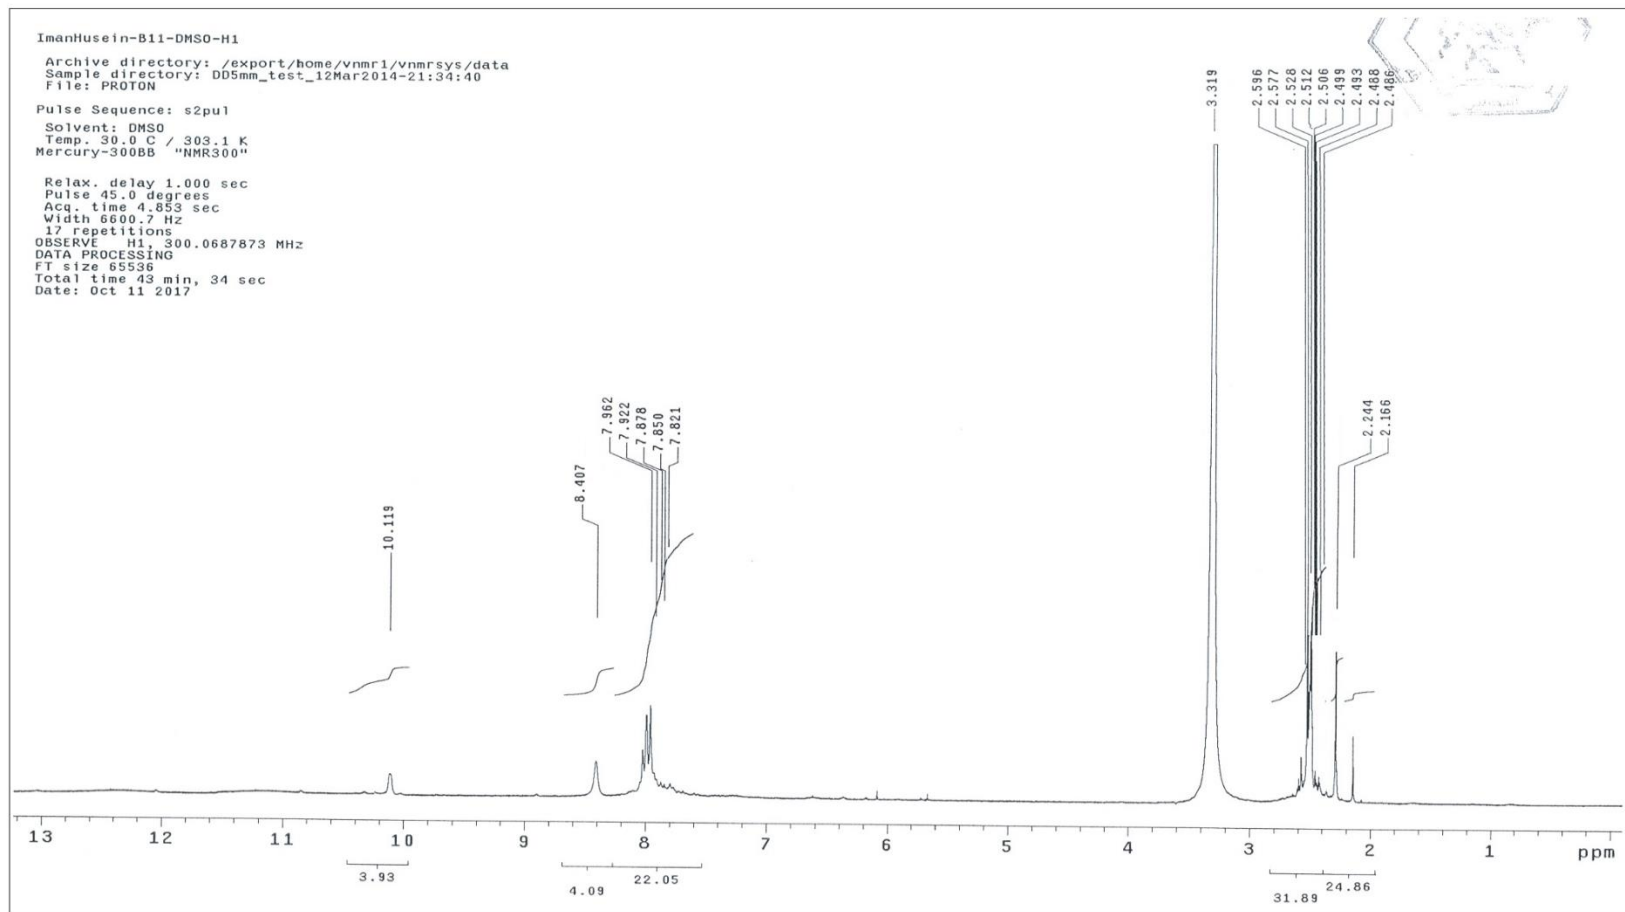



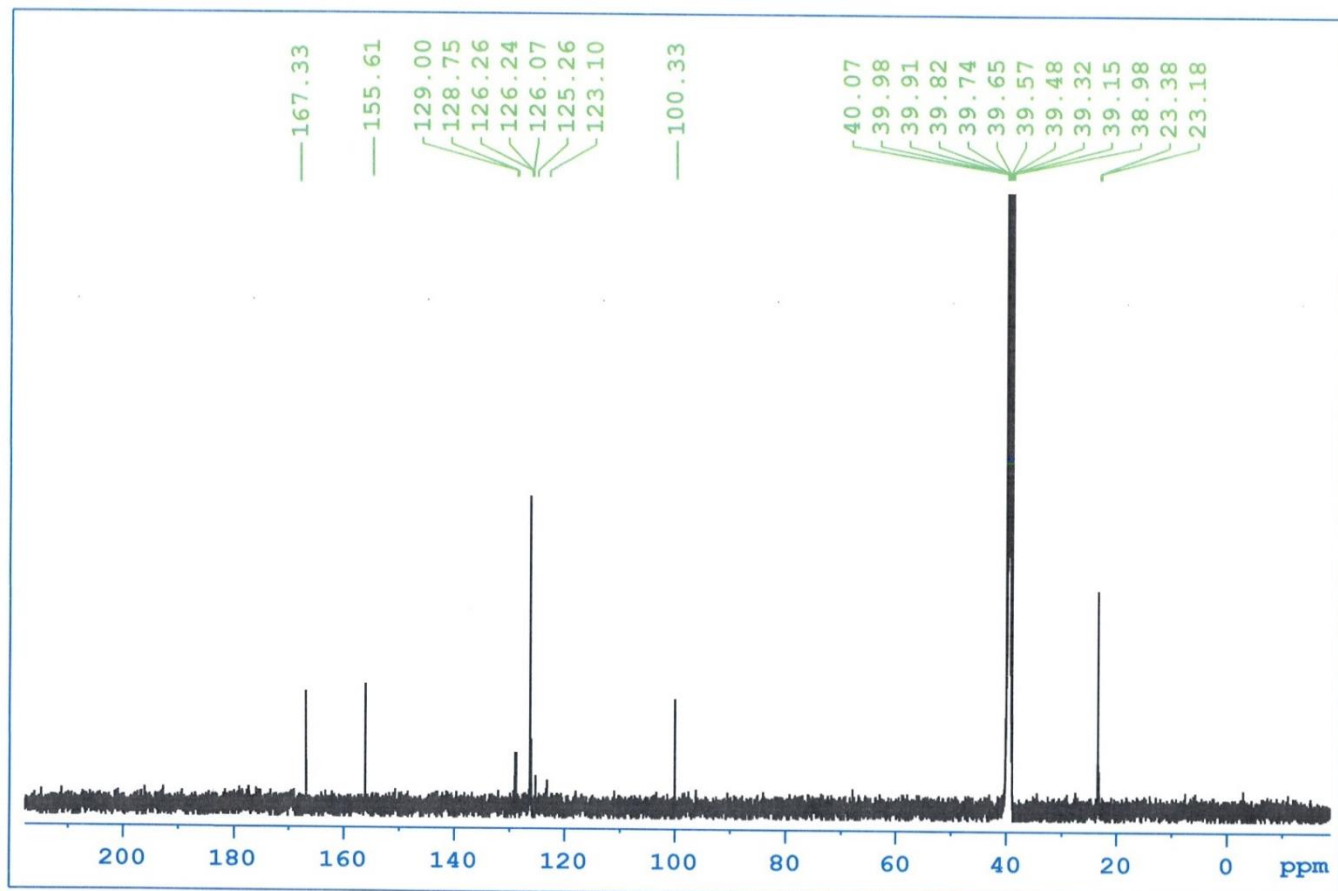

```

NAME      Mar28-2018-nmr
EXPNO    10
PROCNO   1
Date_    20180328
Time     13.13
INSTRUM  spect
PROBHD   5 mm PABBO BB-
PULPROG  zg30
TD       65536
SOLVENT  DMSO
NS       64
DS       2
SWH      10330.578 Hz
FIDRES   0.157632 Hz
AQ       3.1719923 sec
RG       203
DW       48.400 usec
DE       6.50 usec
TE       300.0 K
D1       1.00000000 sec
TDO      1

```

```

===== CHANNEL f1 =====
NUC1     1H
P1       14.56 usec
PL1      3.40 dB
PL1W     12.17042828 W
SF01     500.1330885 MHz
SI       32768
SF       500.1300000 MHz
WDW      EM
SSB      0
LB       0.30 Hz
GB       0
PC       1.00

```

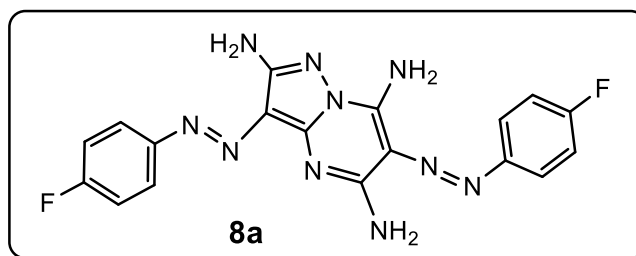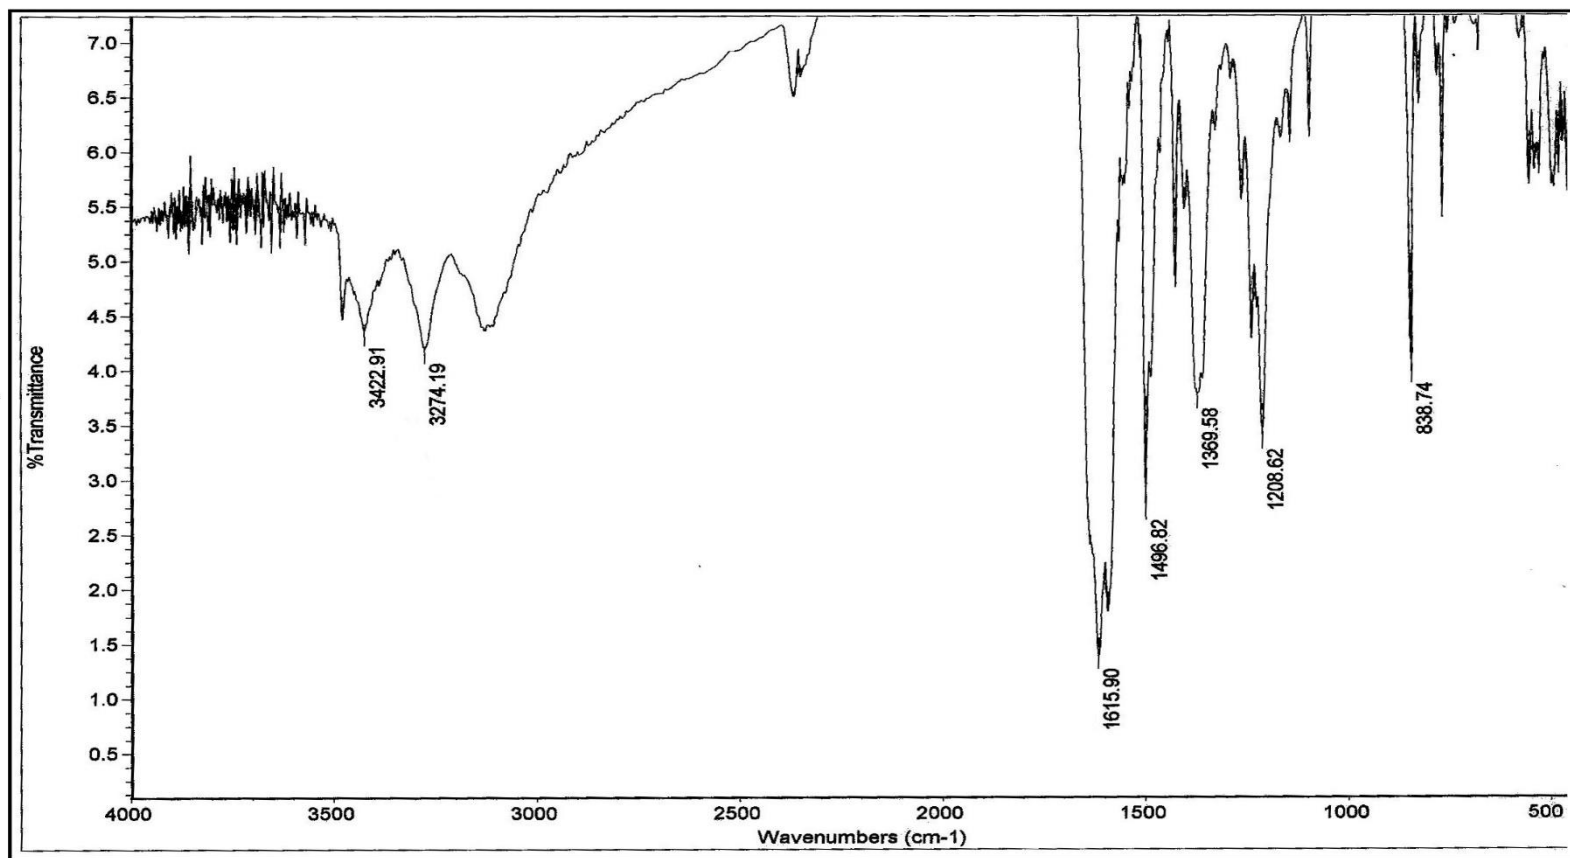

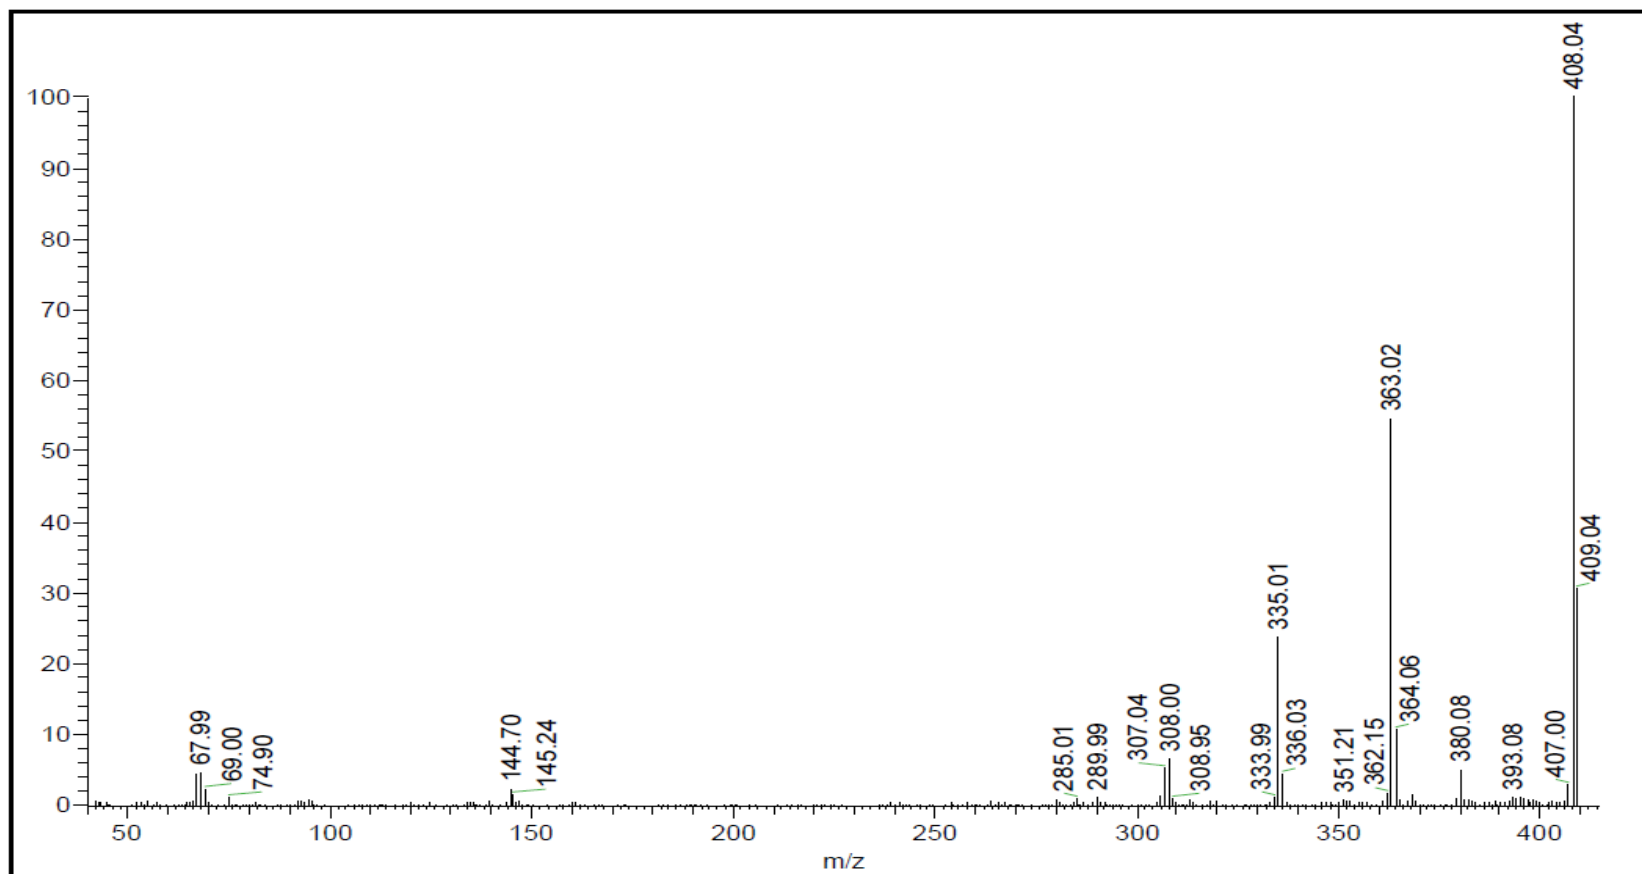

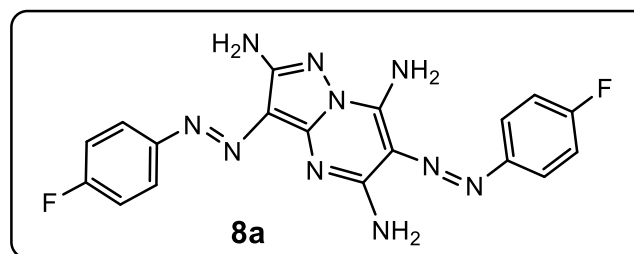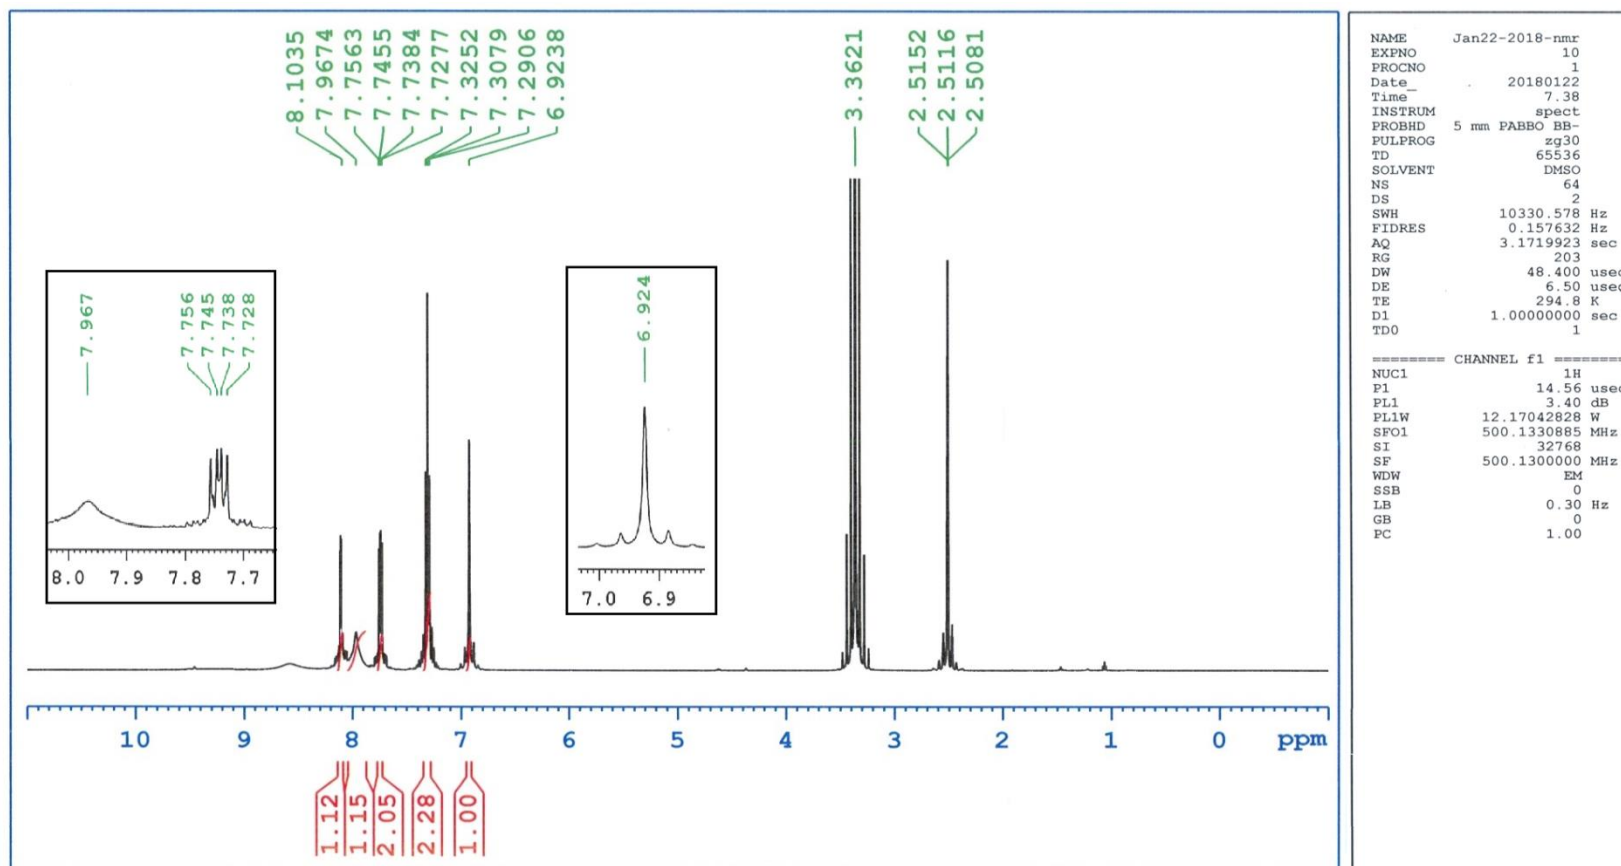

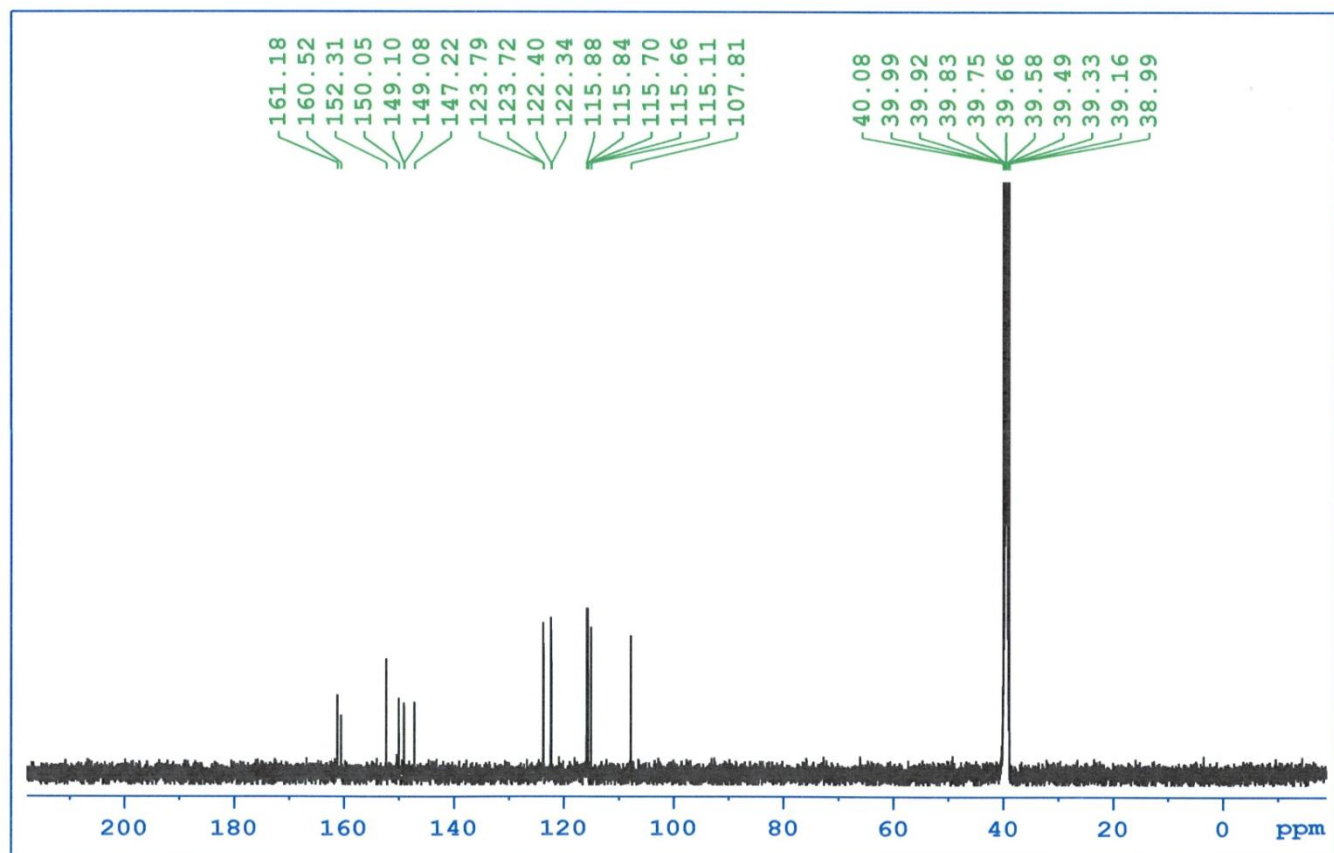

```

NAME      Jan22-2018-nmr
EXPNO    10
PROCNO   1
Date_    20180122
Time     7.38
INSTRUM  spect
PROBHD   5 mm PABBO BB-
PULPROG  zg30
TD       65536
SOLVENT  DMSO
NS       64
DS       2
SWH      10330.578 Hz
FIDRES   0.157632 Hz
AQ       3.171923 sec
RG       203
DW       48.400 usec
DE       6.50 usec
TE       294.8 K
D1       1.00000000 sec
TDO     1

```

```

===== CHANNEL f1 =====
NUC1     1H
P1       14.56 usec
PL1      3.40 dB
PL1W     12.17042828 W
SFO1     500.1330885 MHz
SI       32768
SF       500.1300000 MHz
WDW      EM
SSB      0
LB       0.30 Hz
GB       0
PC       1.00

```

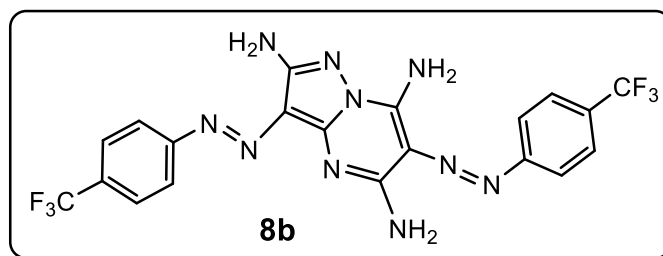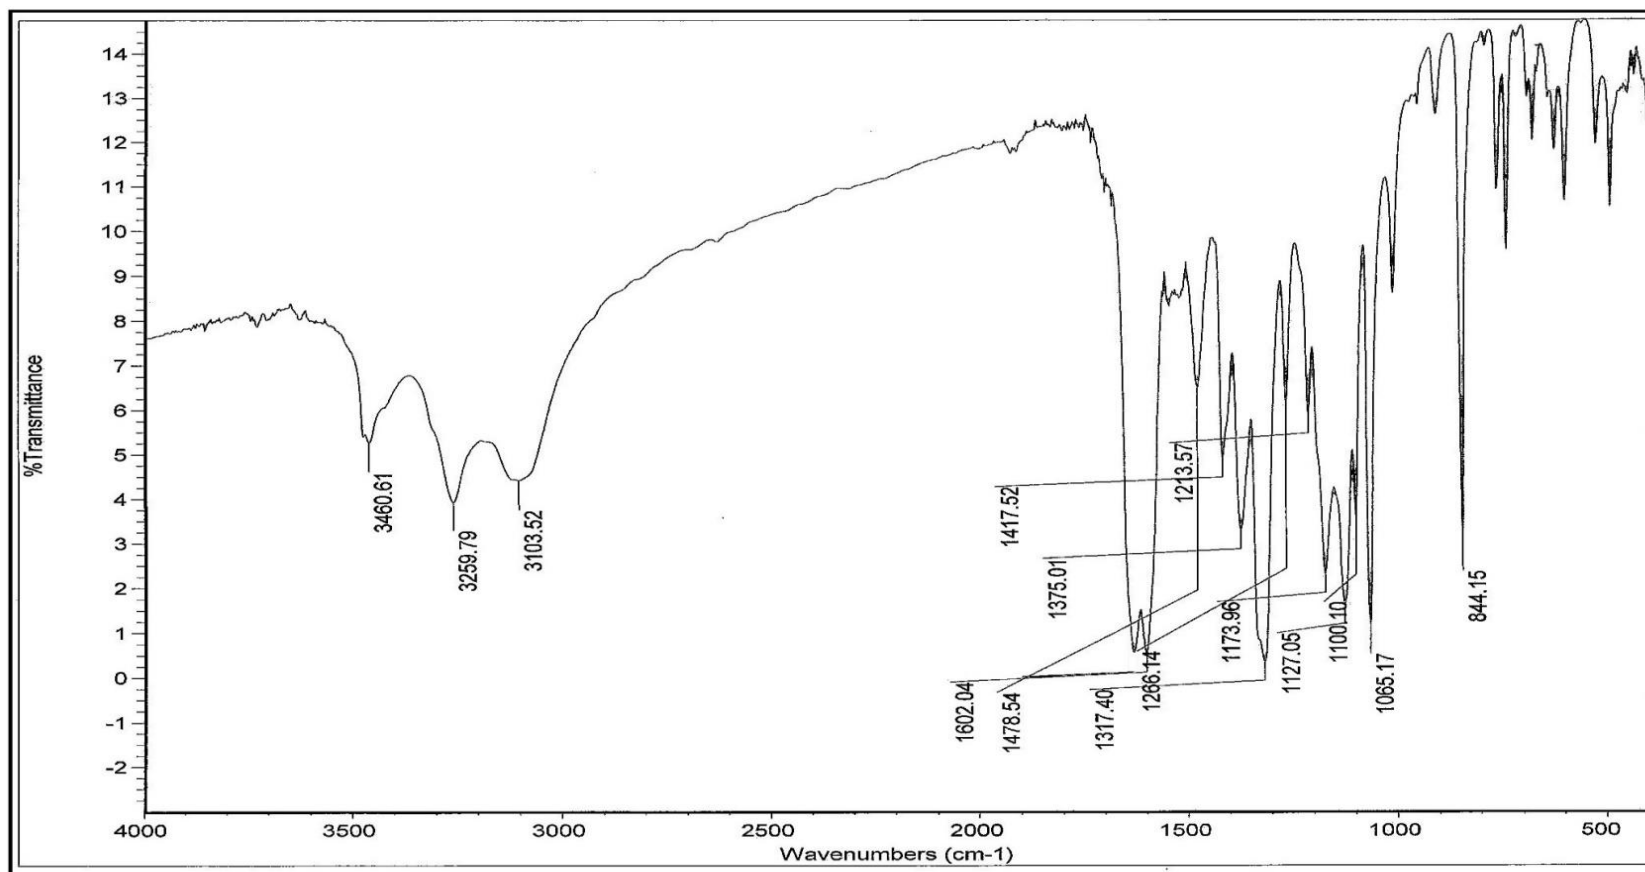

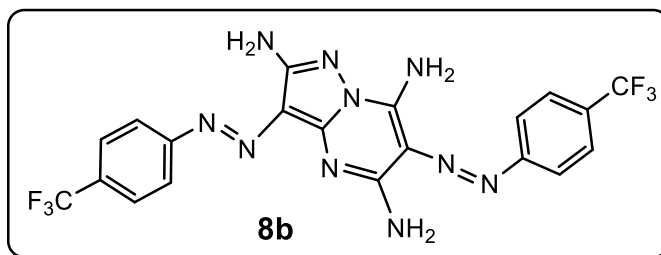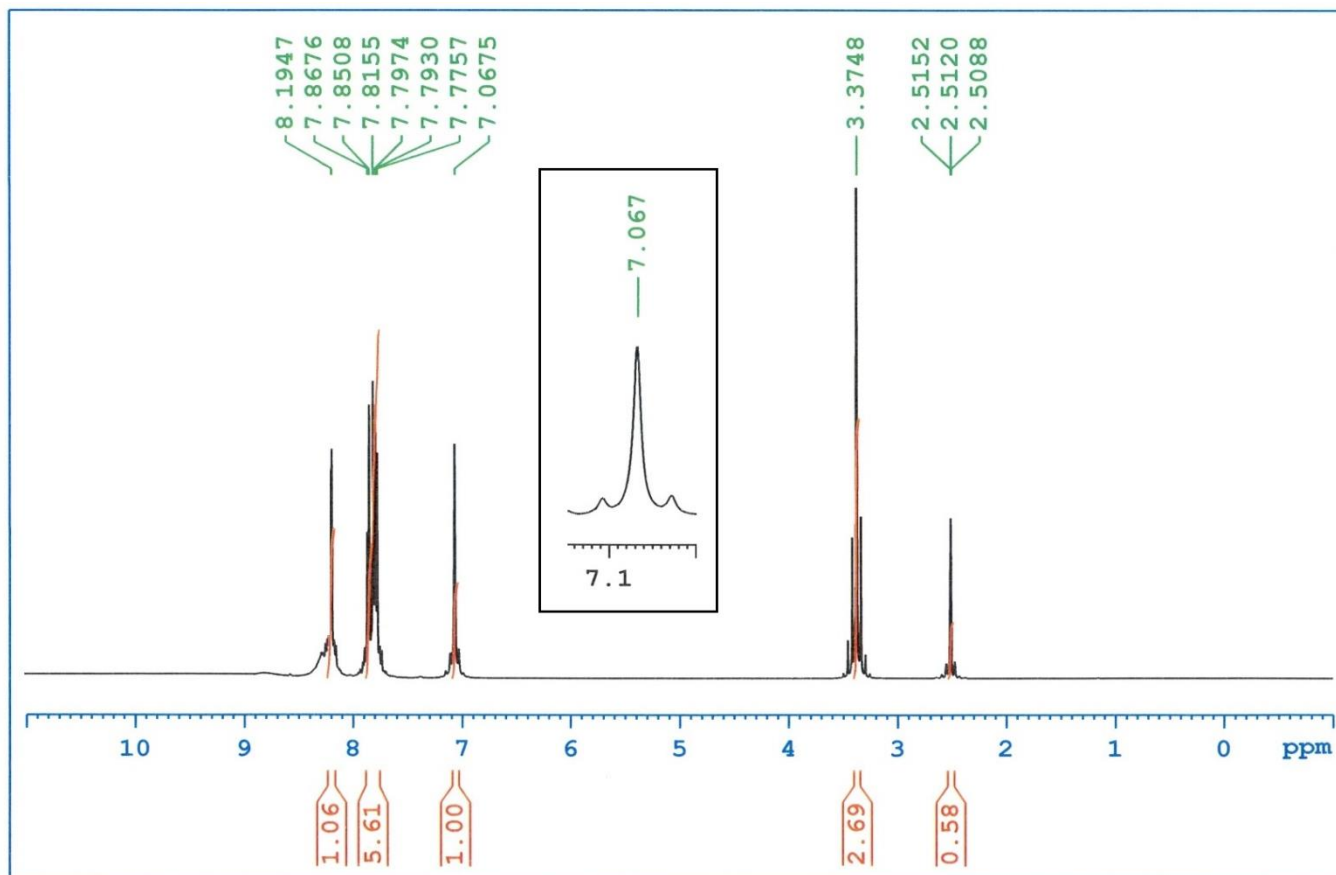

```

NAME      Jan22-2018-nmr
EXPNO     10
PROCNO    1
Date_     20180122
Time      7.38
INSTRUM   spect
PROBHD    5 mm PABBO BB-
PULPROG   zg30
TD         65536
SOLVENT   DMSO
NS         64
DS         2
SWH        10330.578 Hz
FIDRES     0.157632 Hz
AQ         3.1719923 sec
RG         203
DW         48.400 usec
DE         6.50 usec
TE         294.8 K
D1         1.00000000 sec
TD0        1
  
```

```

===== CHANNEL f1 =====
NUC1       1H
P1         14.56 usec
PL1        3.40 dB
PL1W       12.17042828 W
SFO1       500.1330885 MHz
SI         32768
SF         500.1300000 MHz
WDW        EM
SSB        0
LB         0.30 Hz
GB         0
PC         1.00
  
```

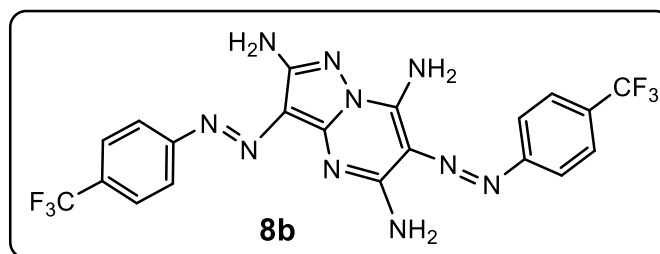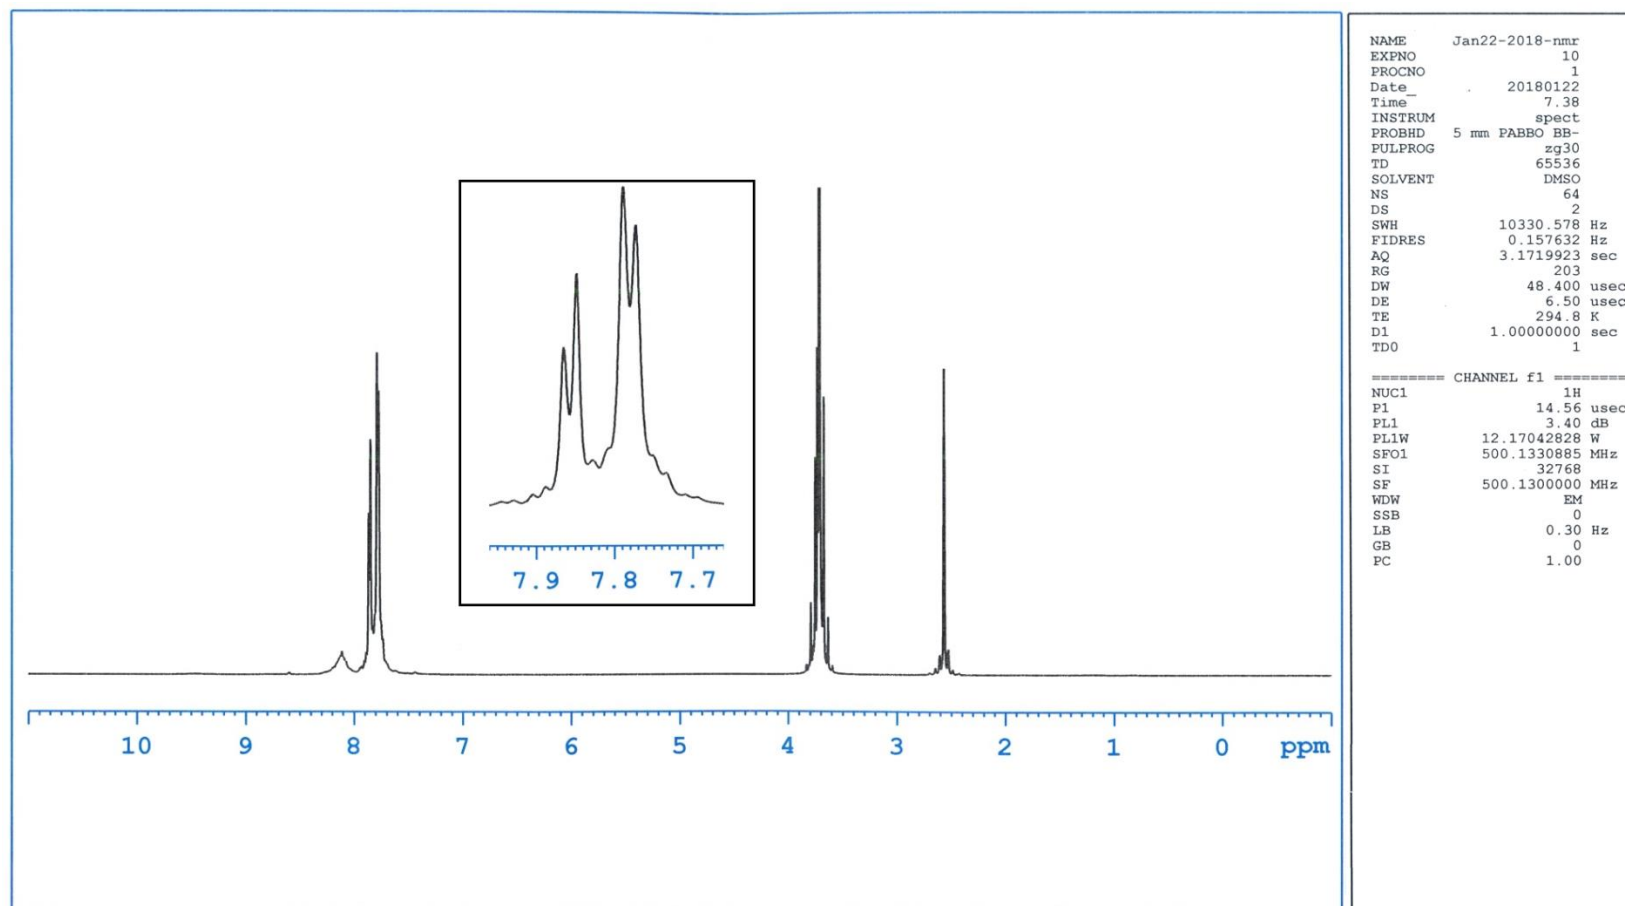



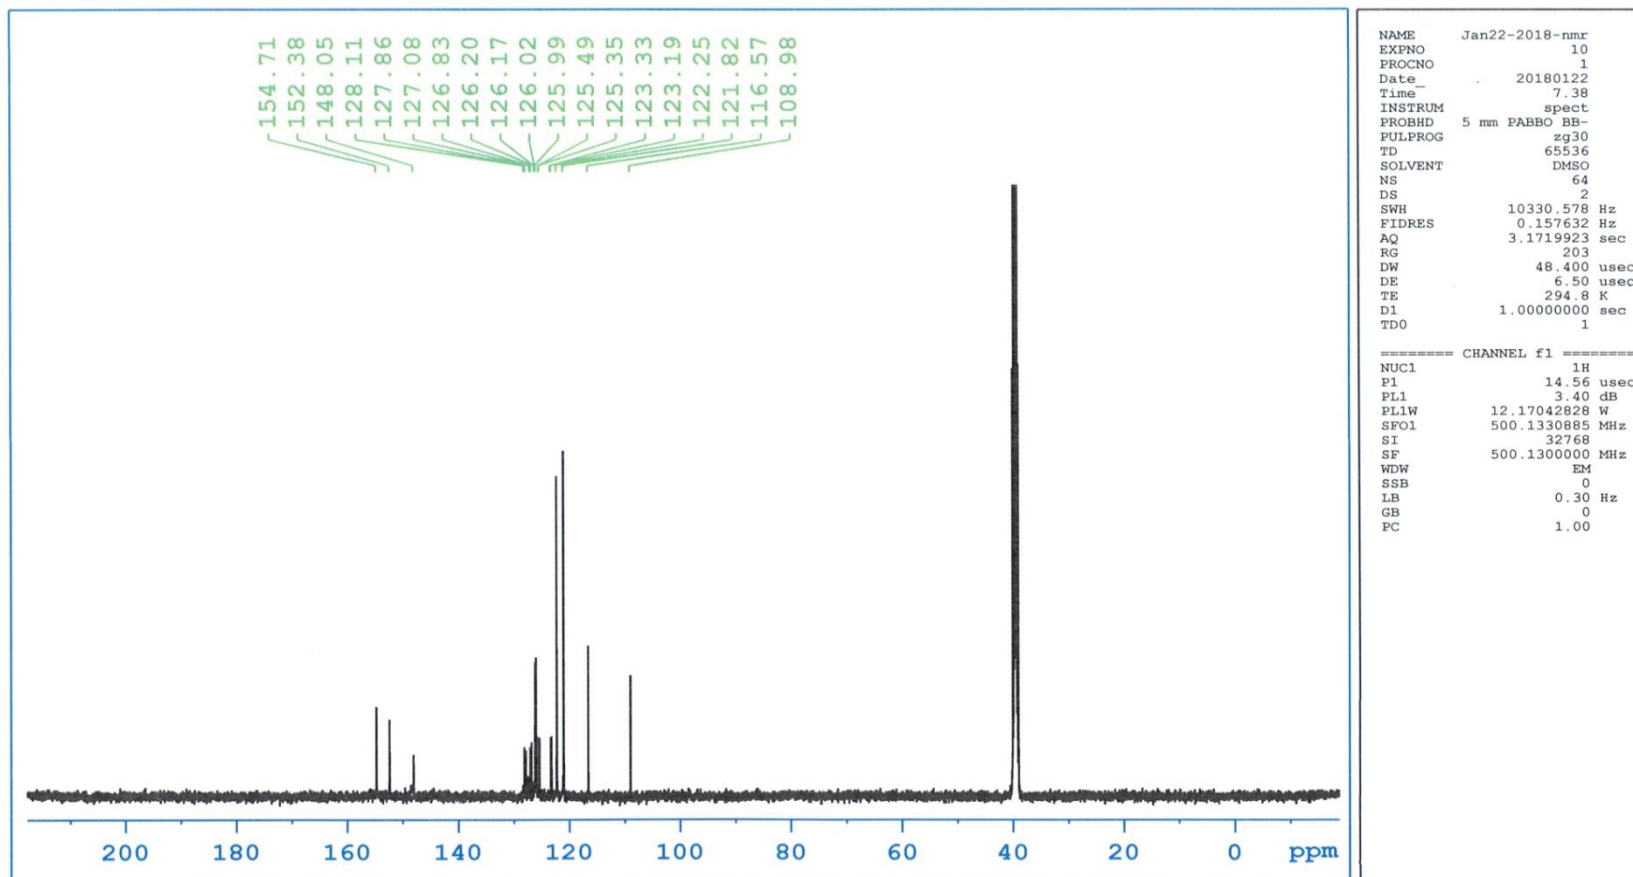

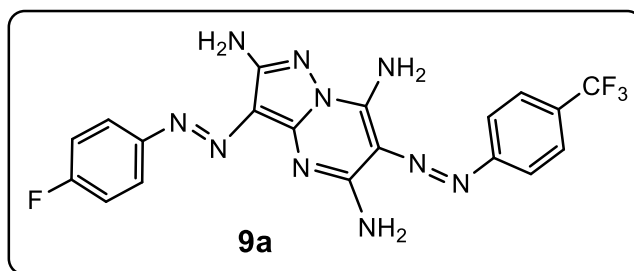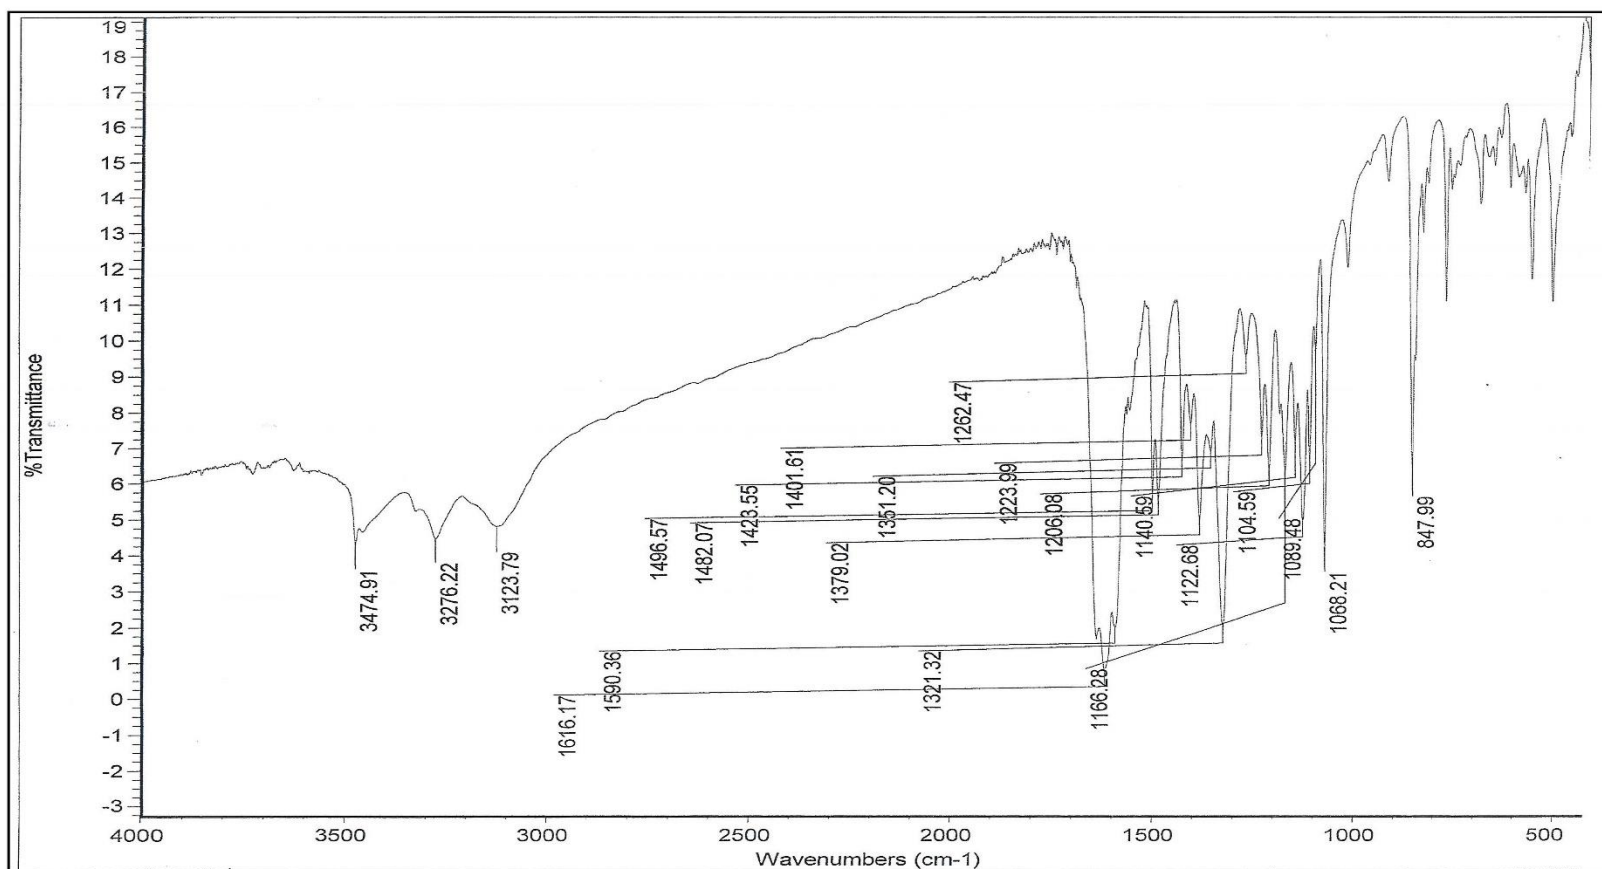

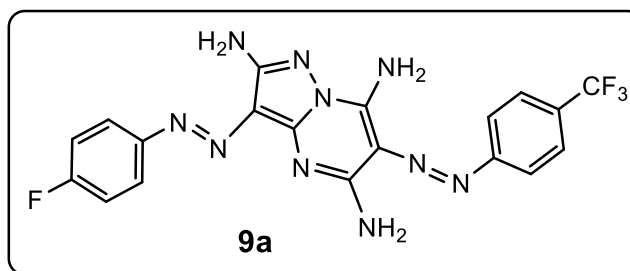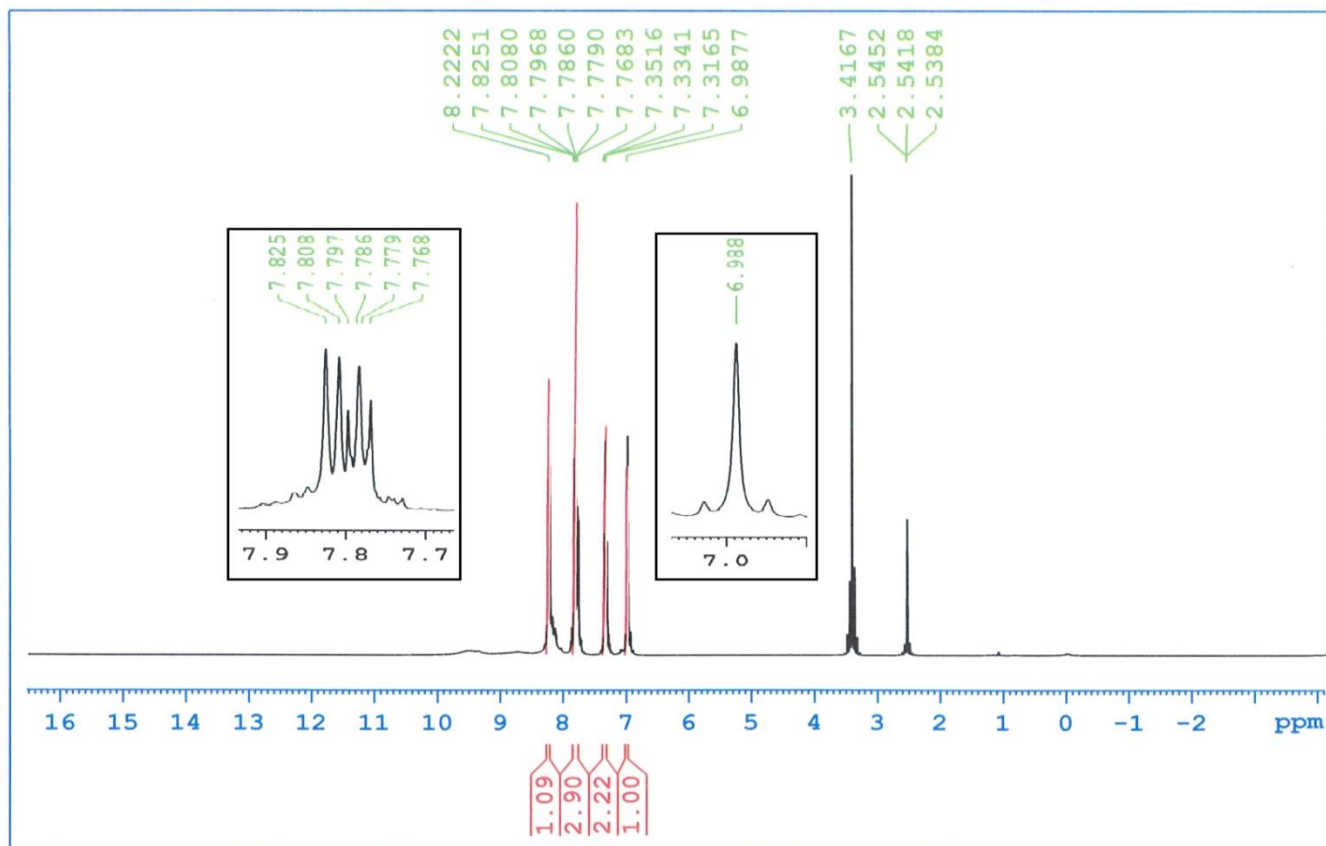

```

NAME      Jan14-2018-nmr
EXPNO     30
PROCNO    1
Date_     20180114
Time      15.55
INSTRUM   spect
PROBHD    5 mm PABBO BB-
PULPROG   zg30
TD        65536
SOLVENT   DMSO
NS        64
DS        2
SWH       10330.578 Hz
FIDRES    0.157632 Hz
AQ        3.1719923 sec
RG        203
DW        48.400 usec
DE        6.50 usec
TE        300.0 K
D1        1.00000000 sec
TD0       1

===== CHANNEL f1 =====
NUC1      1H
P1        14.56 usec
PL1       3.40 dB
PL1W      12.17042828 W
SF01      500.1330885 MHz
SI        32768
SF        500.1300000 MHz
WDW       EM
SSB       0
LB        0.30 Hz
GB        0
PC        1.00

```

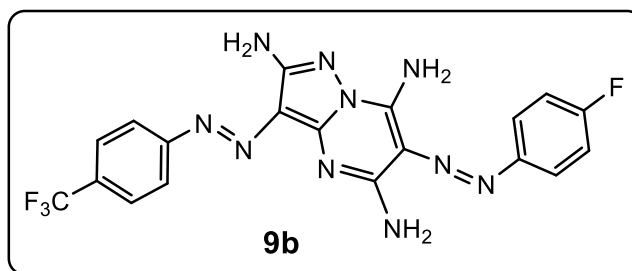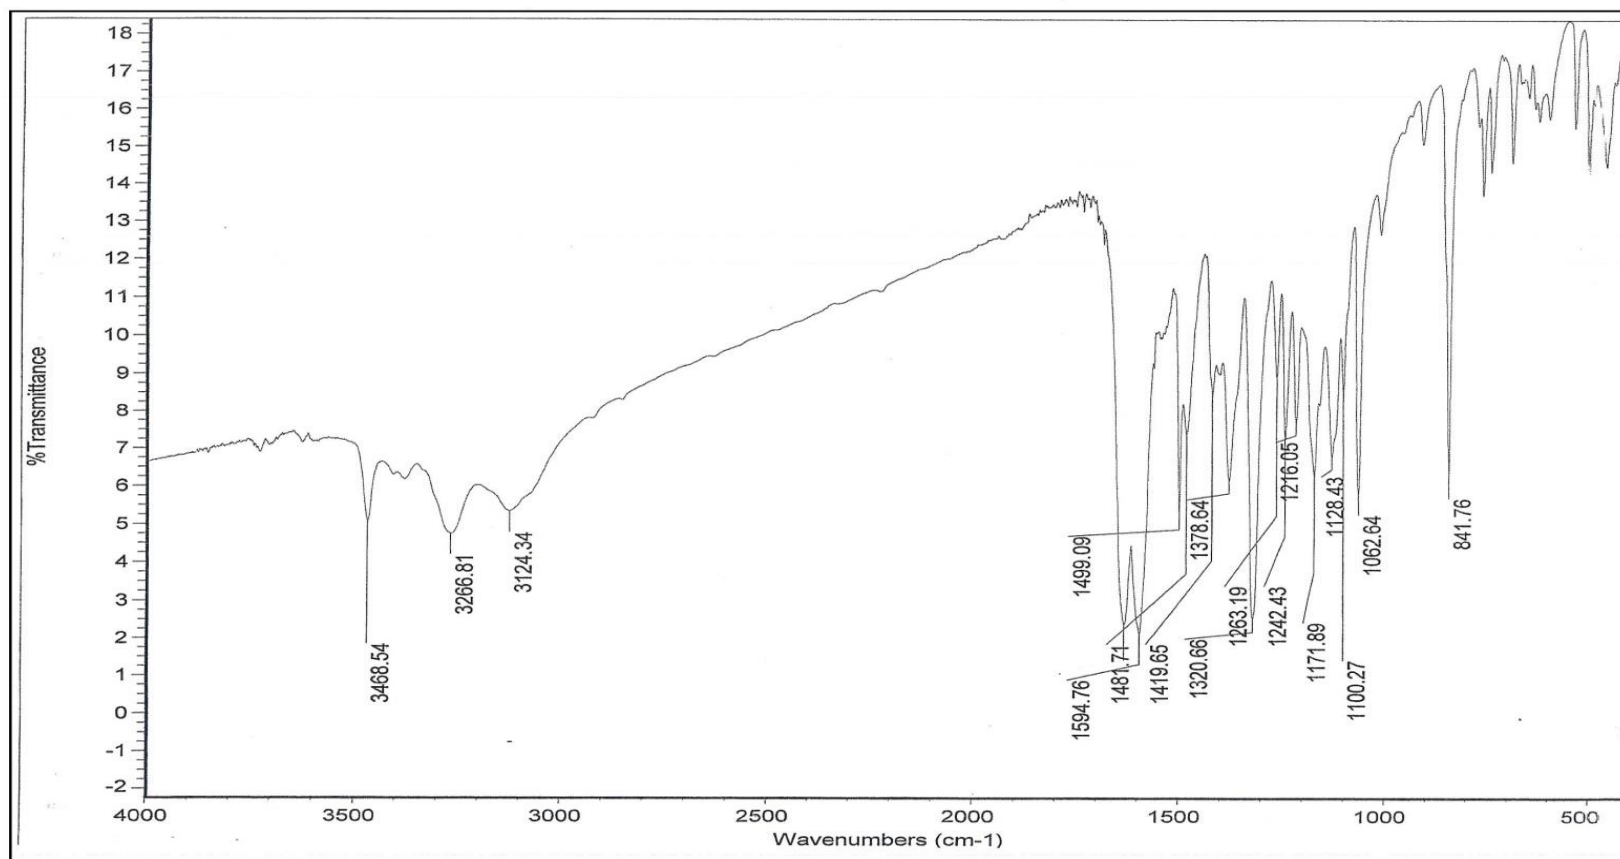

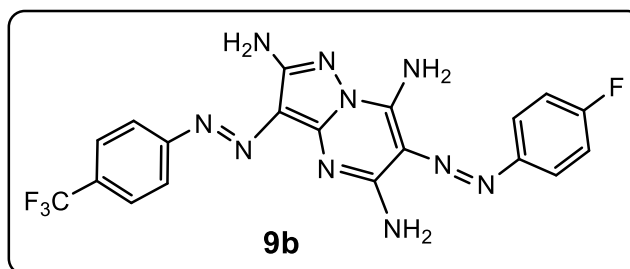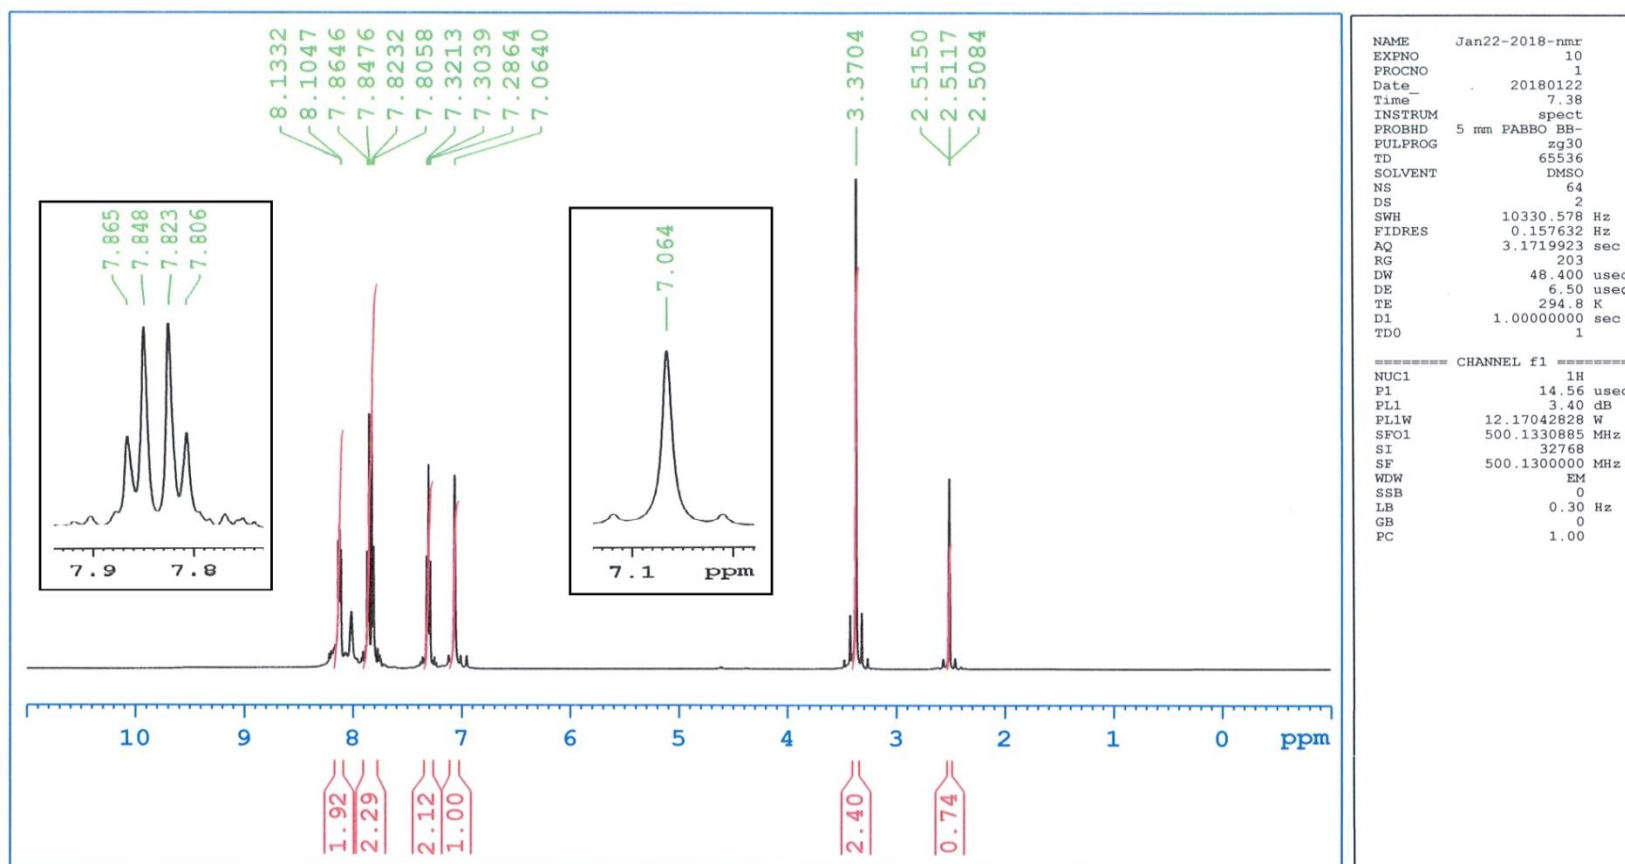

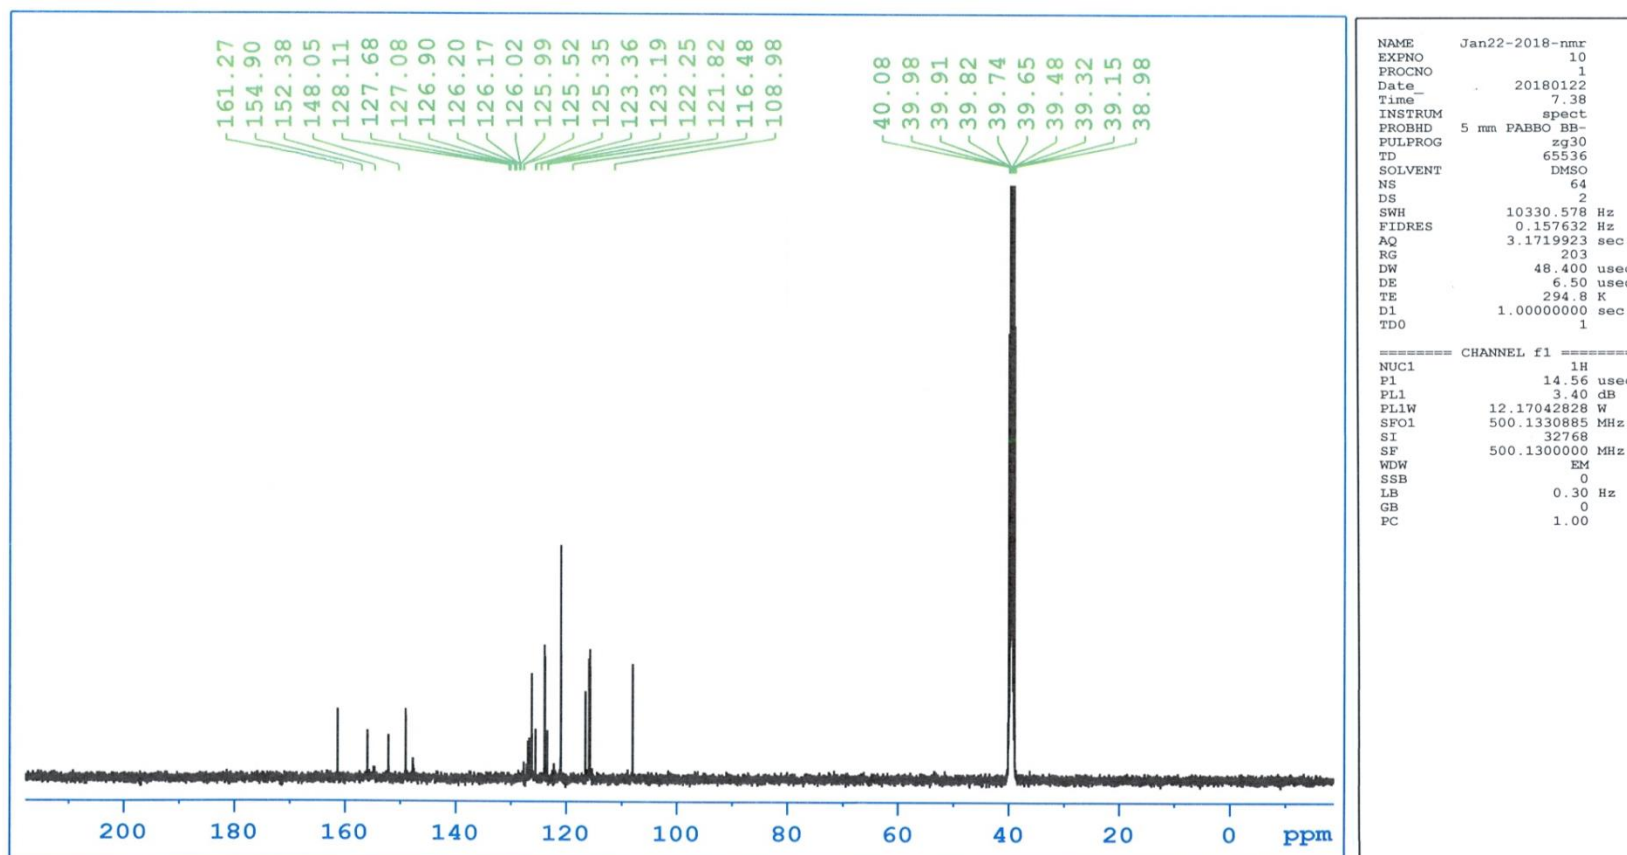

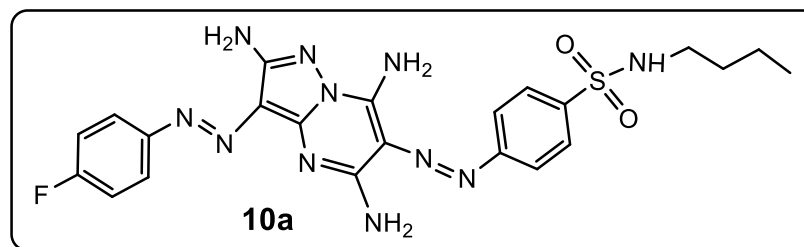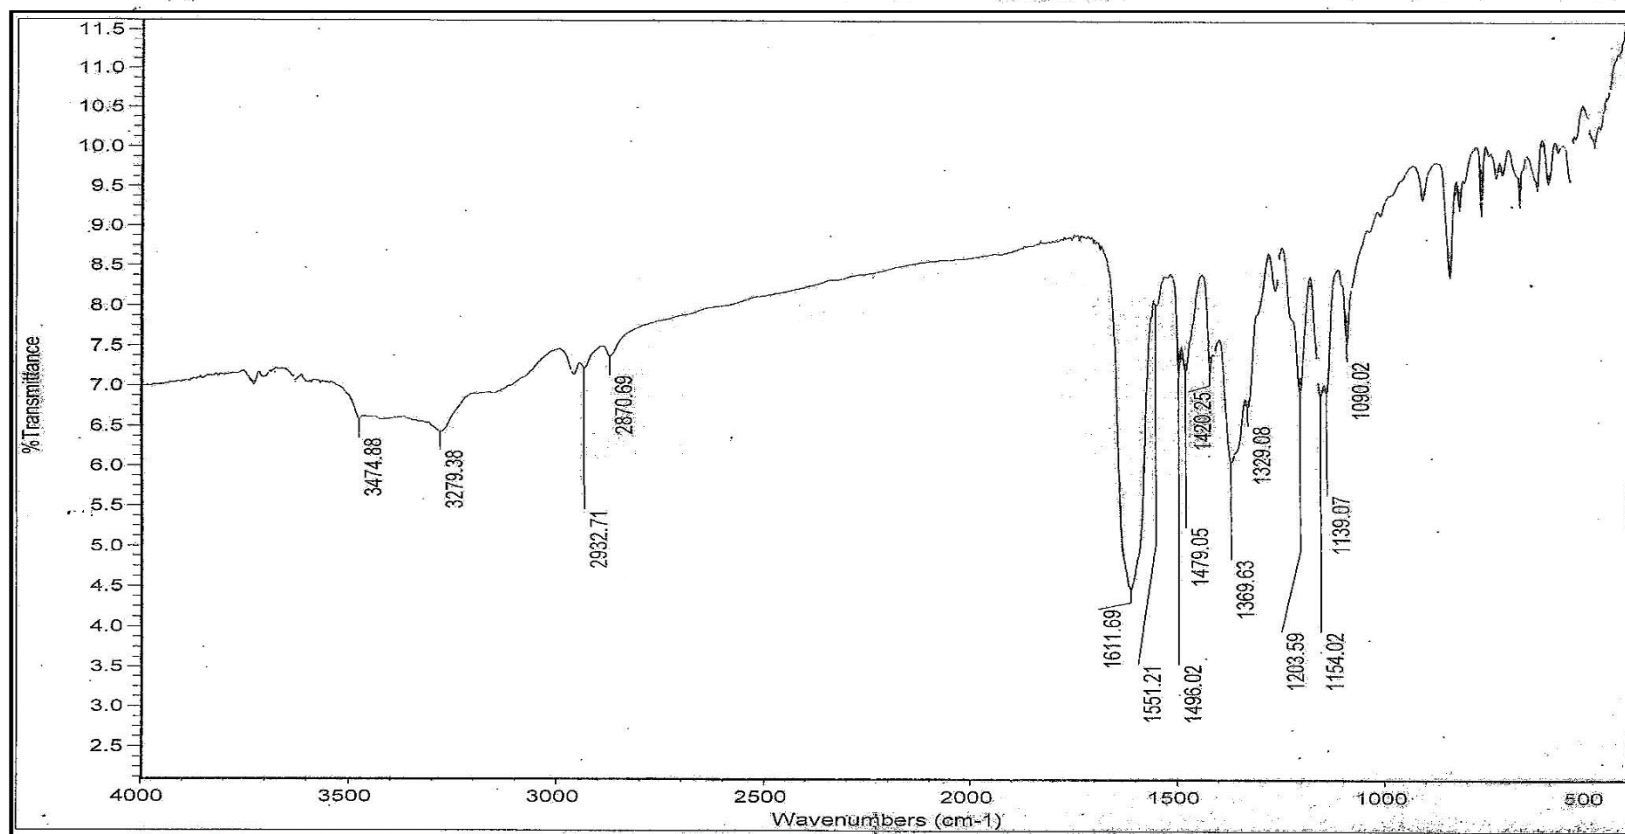

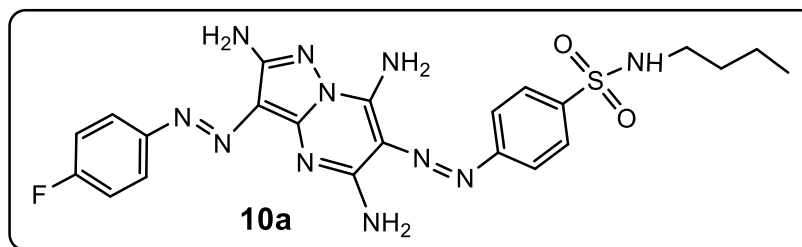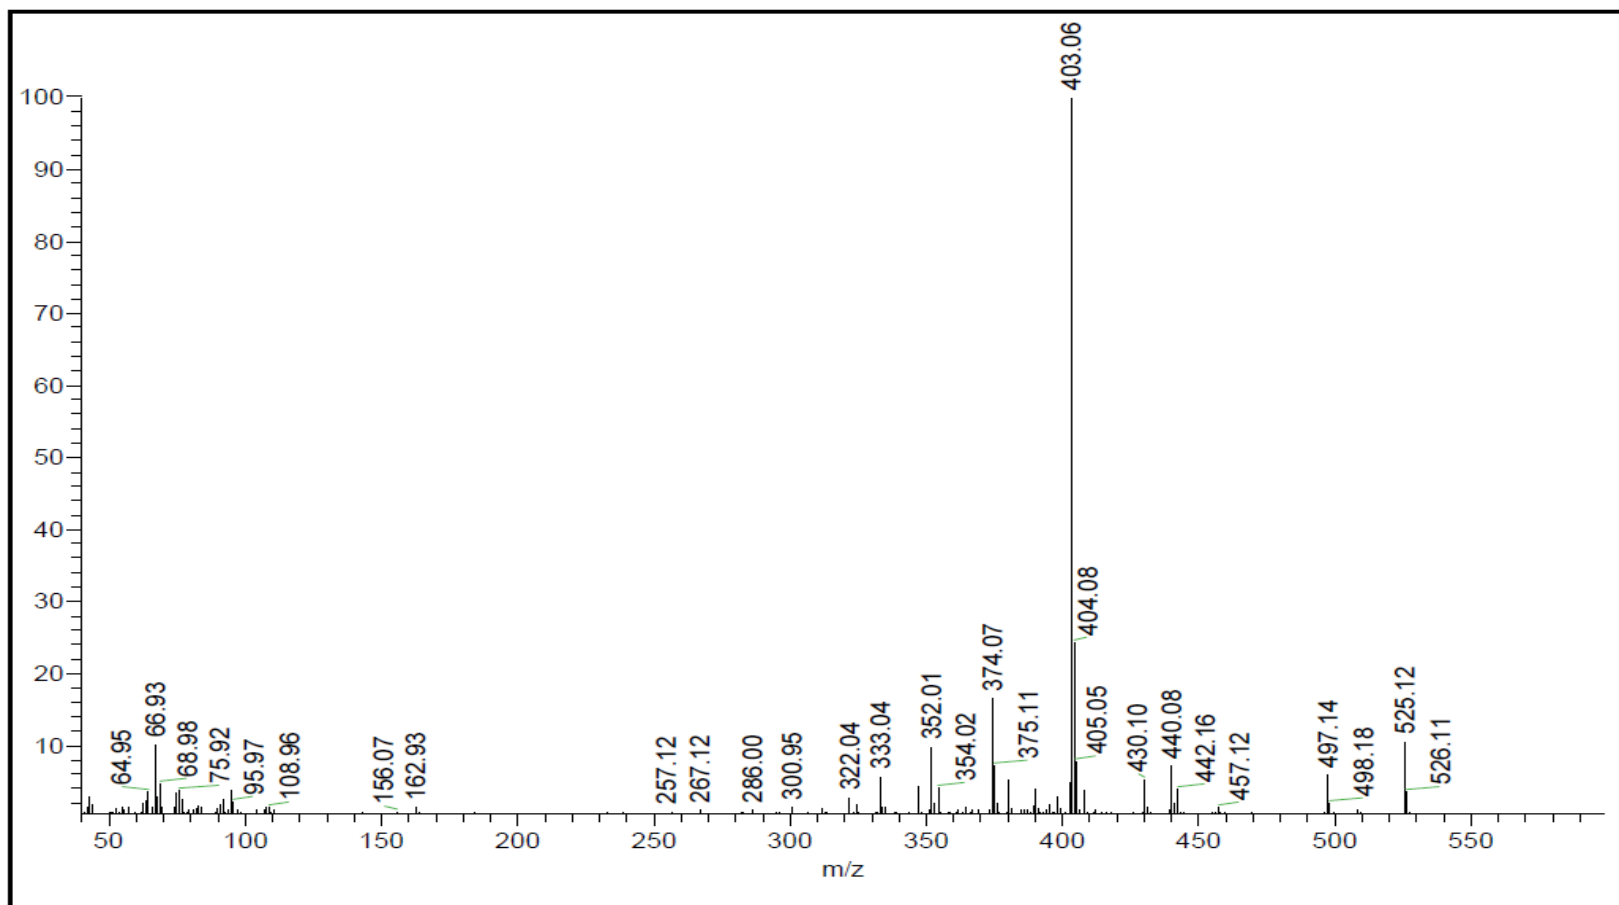



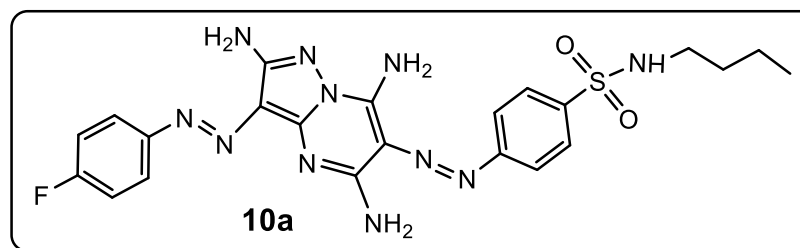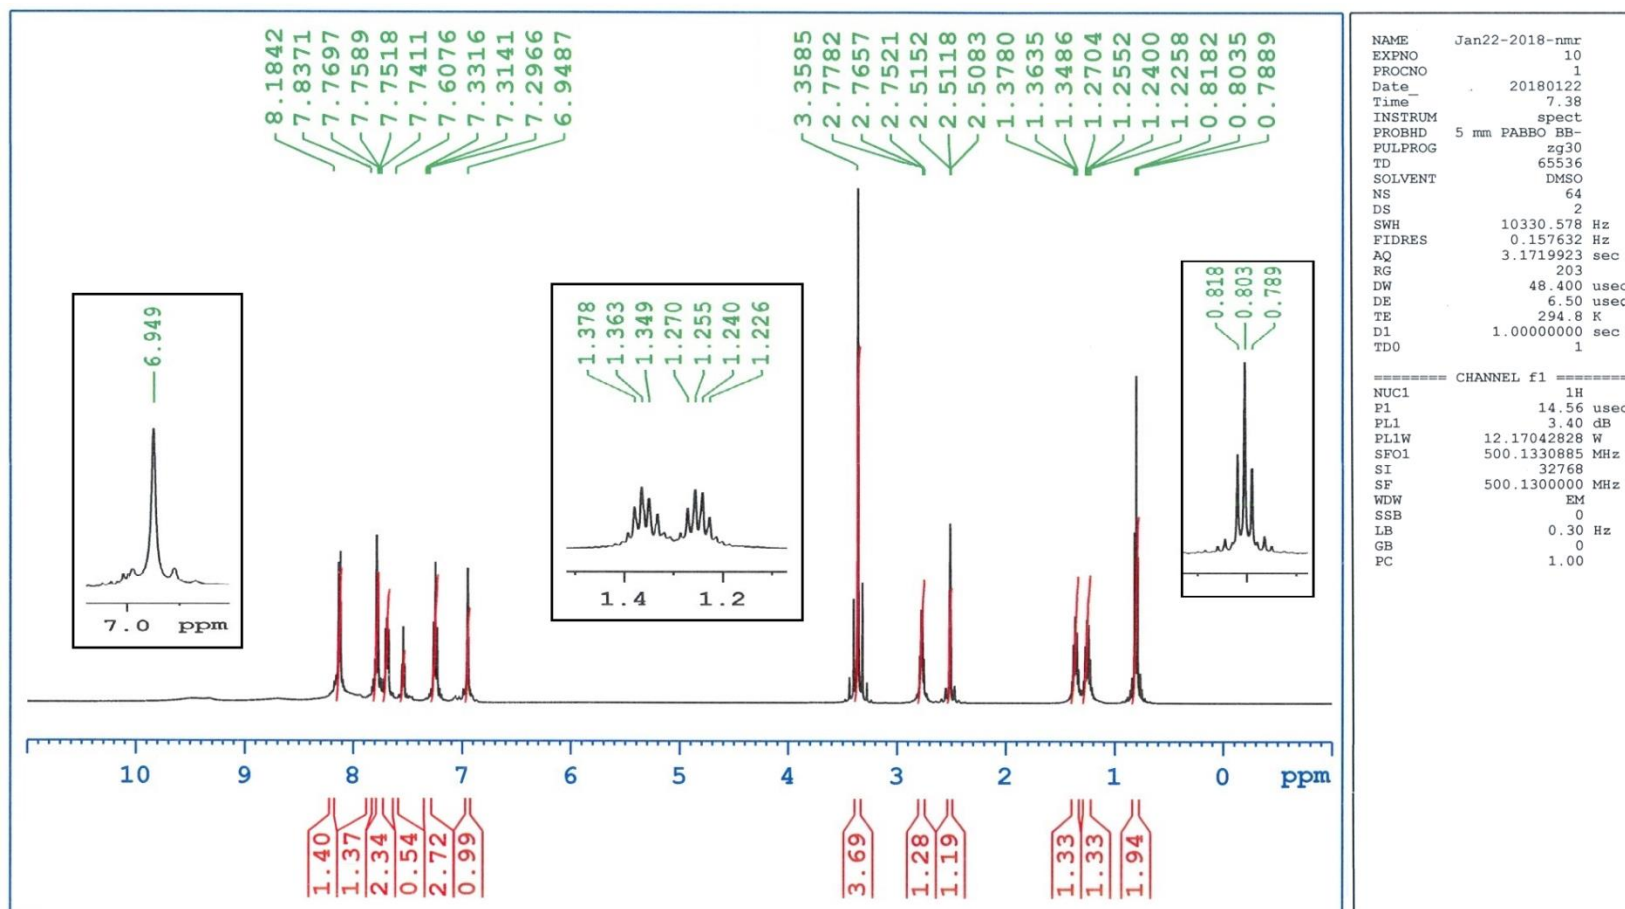

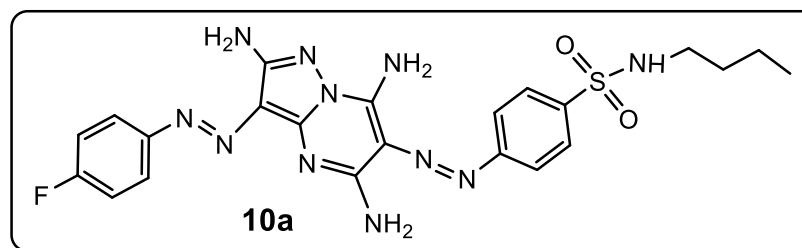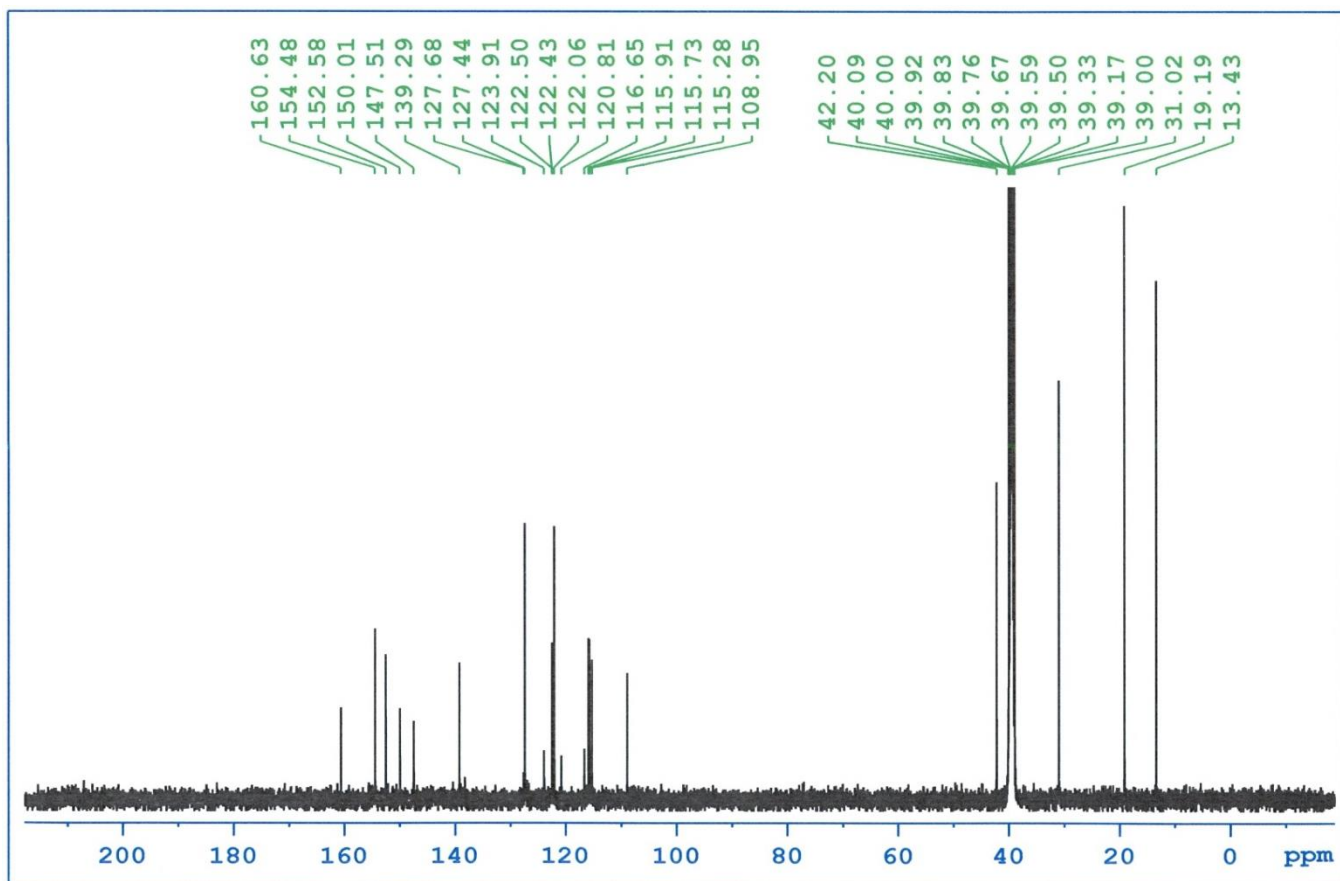

```

NAME      Jan22-2018-nmr
EXPNO     10
PROCNO    1
Date_     20180122
Time_     7.38
INSTRUM   spect
PROBHD    5 mm PABBO BB-
PULPROG   zg30
TD         65536
SOLVENT   DMSO
NS         64
DS         2
SWH        10330.578 Hz
FIDRES     0.157632 Hz
AQ         3.1719923 sec
RG         203
DW         48.400 usec
DE         6.50 usec
TE         294.8 K
D1         1.0000000 sec
TDO        1

```

```

===== CHANNEL f1 =====
NUC1      1H
P1        14.56 usec
PL1       3.40 dB
PL1W      12.17042828 W
SFO1      500.1330885 MHz
SI        32768
SF        500.1300000 MHz
WDW       EM
SSB       0
LB        0.30 Hz
GB        0
FC        1.00

```

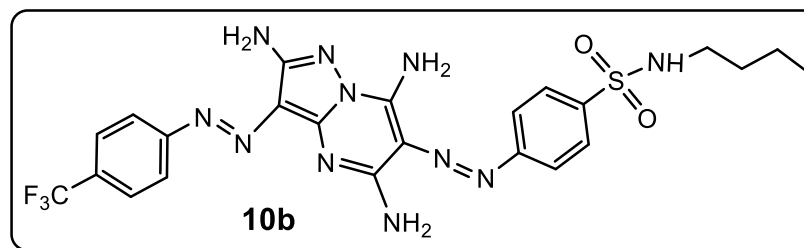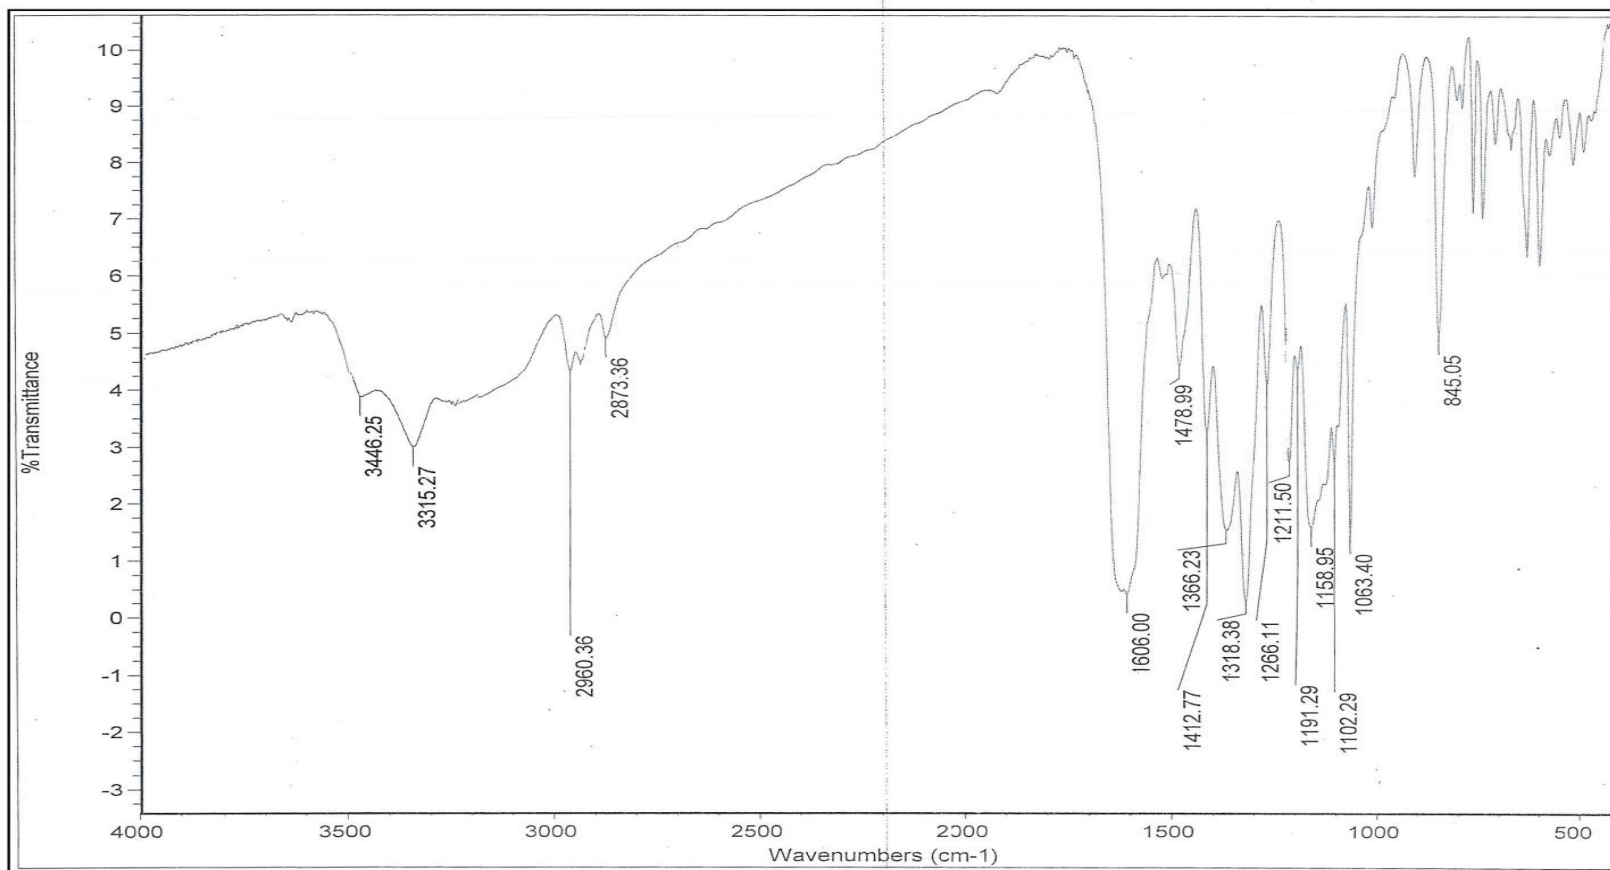

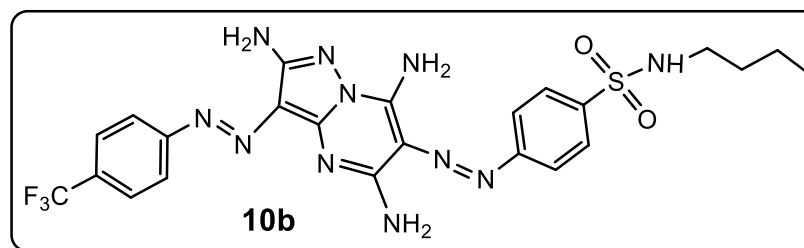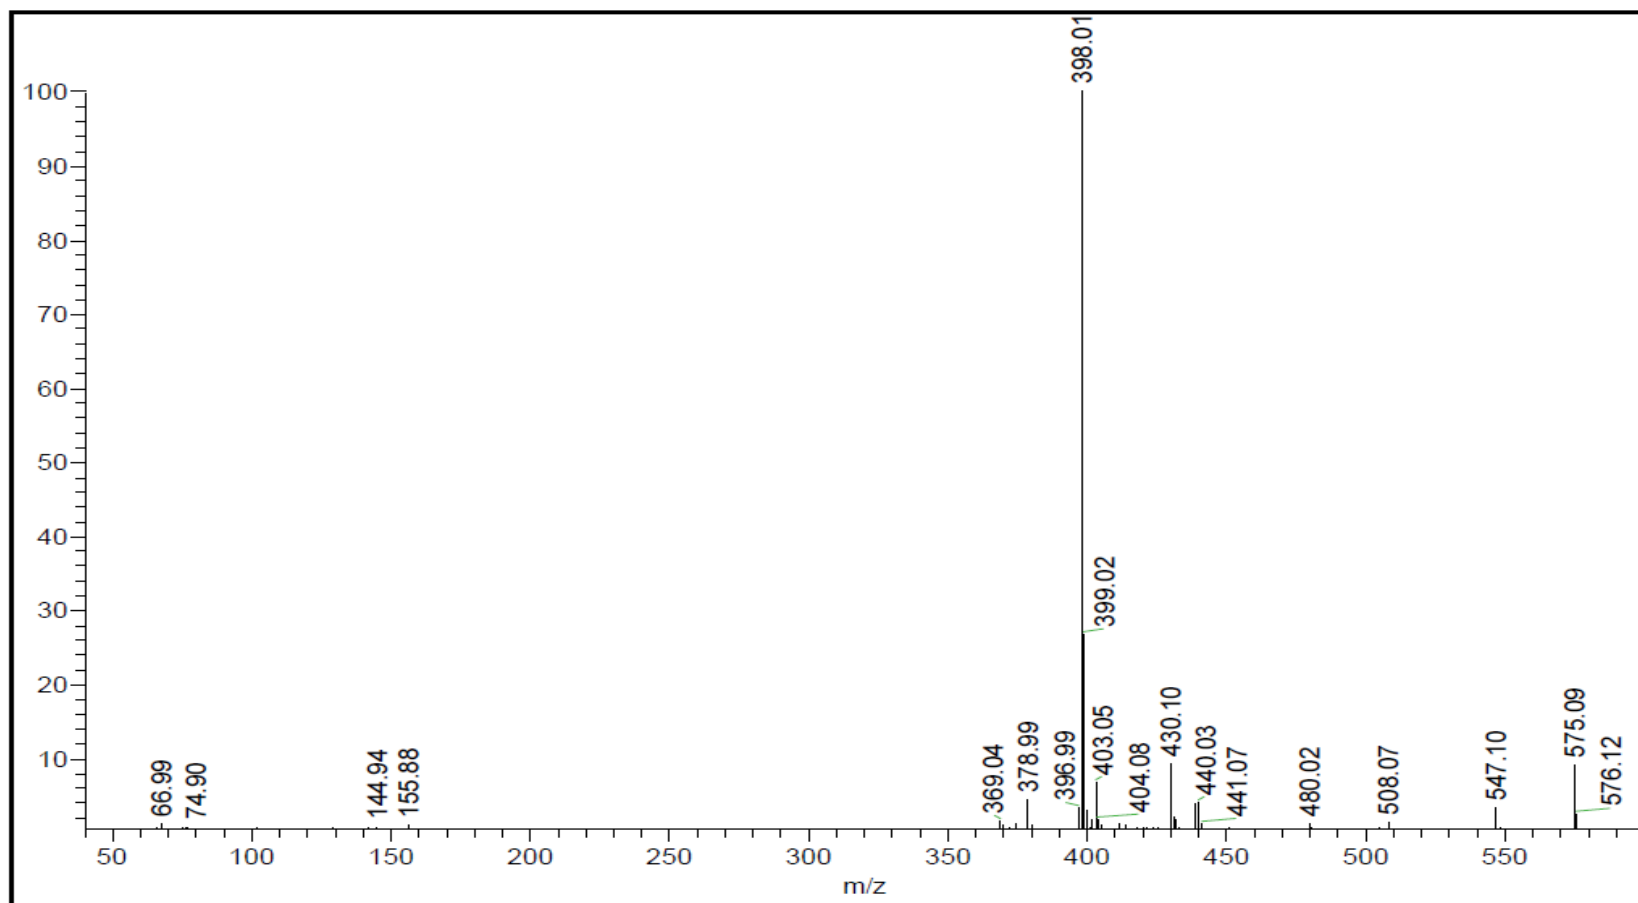

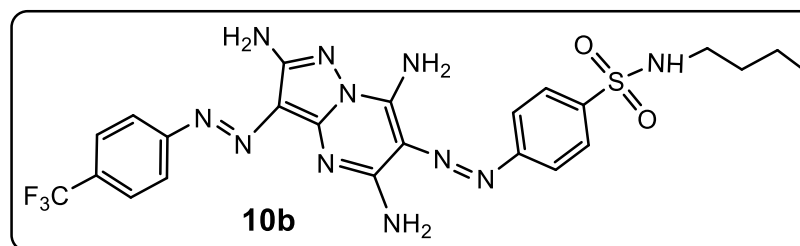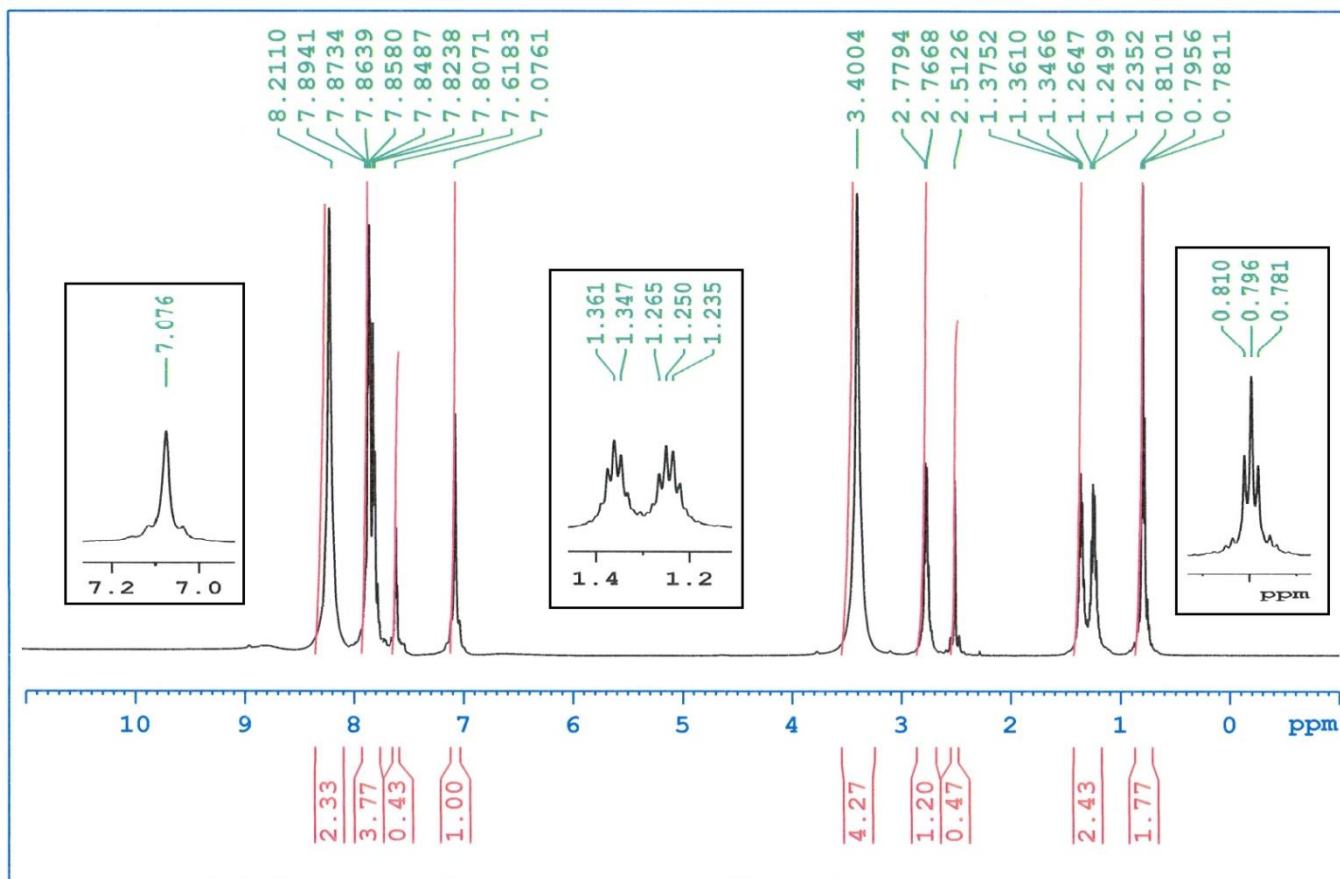

```

NAME      Jan22-2018-nmr
EXPNO     10
PROCNO    1
Date_     20180122
Time      7.38
INSTRUM   spect
PROBHD    5 mm PABBO BB-
PULPROG   zg30
TD         65536
SOLVENT   DMSO
NS         64
DS         2
SWH        10330.578 Hz
FIDRES     0.157632 Hz
AQ         3.1719923 sec
RG         203
DW         48.400 usec
DE         6.50 usec
TE         294.8 K
D1         1.00000000 sec
TD0        1
  
```

```

===== CHANNEL f1 =====
NUC1      1H
P1        14.56 usec
PL1       3.40 dB
PL1W      12.17042828 W
SFO1      500.1330885 MHz
SI         32768
SF         500.1300000 MHz
WDW        EM
SSB        0
LB         0.30 Hz
GB         0
PC         1.00
  
```

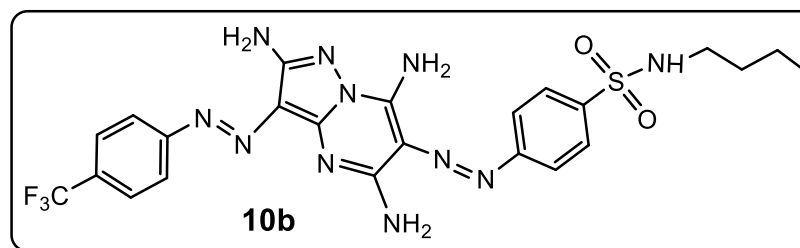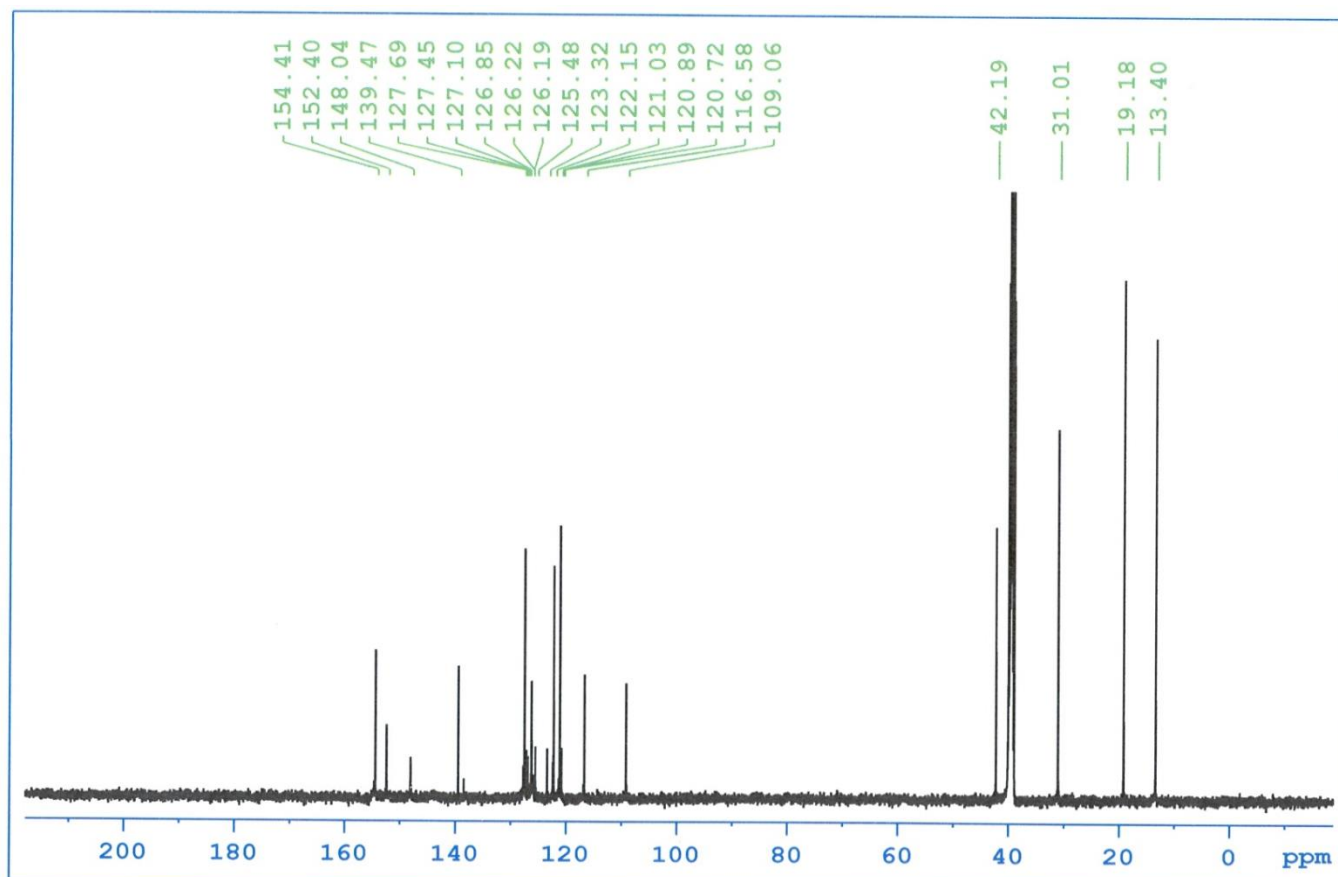

```

NAME      Jan22-2018-nmr
EXPNO     10
PROCNO    1
Date_     20180122
Time_     7.38
INSTRUM   spect
PROBHD    5 mm PABBO BB-
PULPROG   zg30
TD         65536
SOLVENT   DMSO
NS         64
DS         2
SWH        10330.578 Hz
FIDRES     0.157632 Hz
AQ         3.1719923 sec
RG         203
DW         48.400 usec
DE         6.50 usec
TE         294.8 K
D1         1.00000000 sec
TD0        1

```

```

===== CHANNEL f1 =====
NUC1      1H
P1        14.56 usec
PL1       3.40 dB
PL1W      12.17042828 W
SFO1      500.1330885 MHz
SI        32768
SF        500.1300000 MHz
WDW       EM
SSB       0
LB        0.30 Hz
GB        0
PC        1.00

```

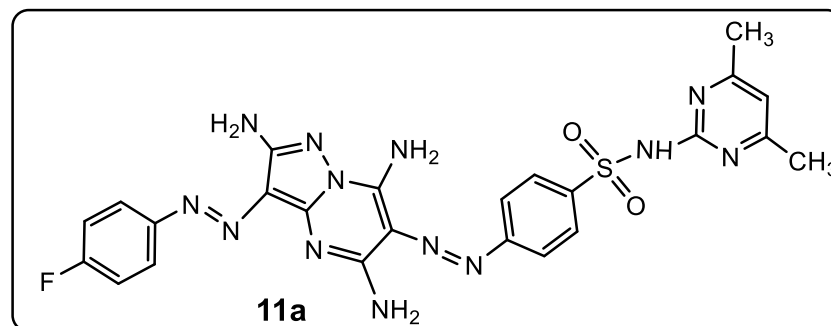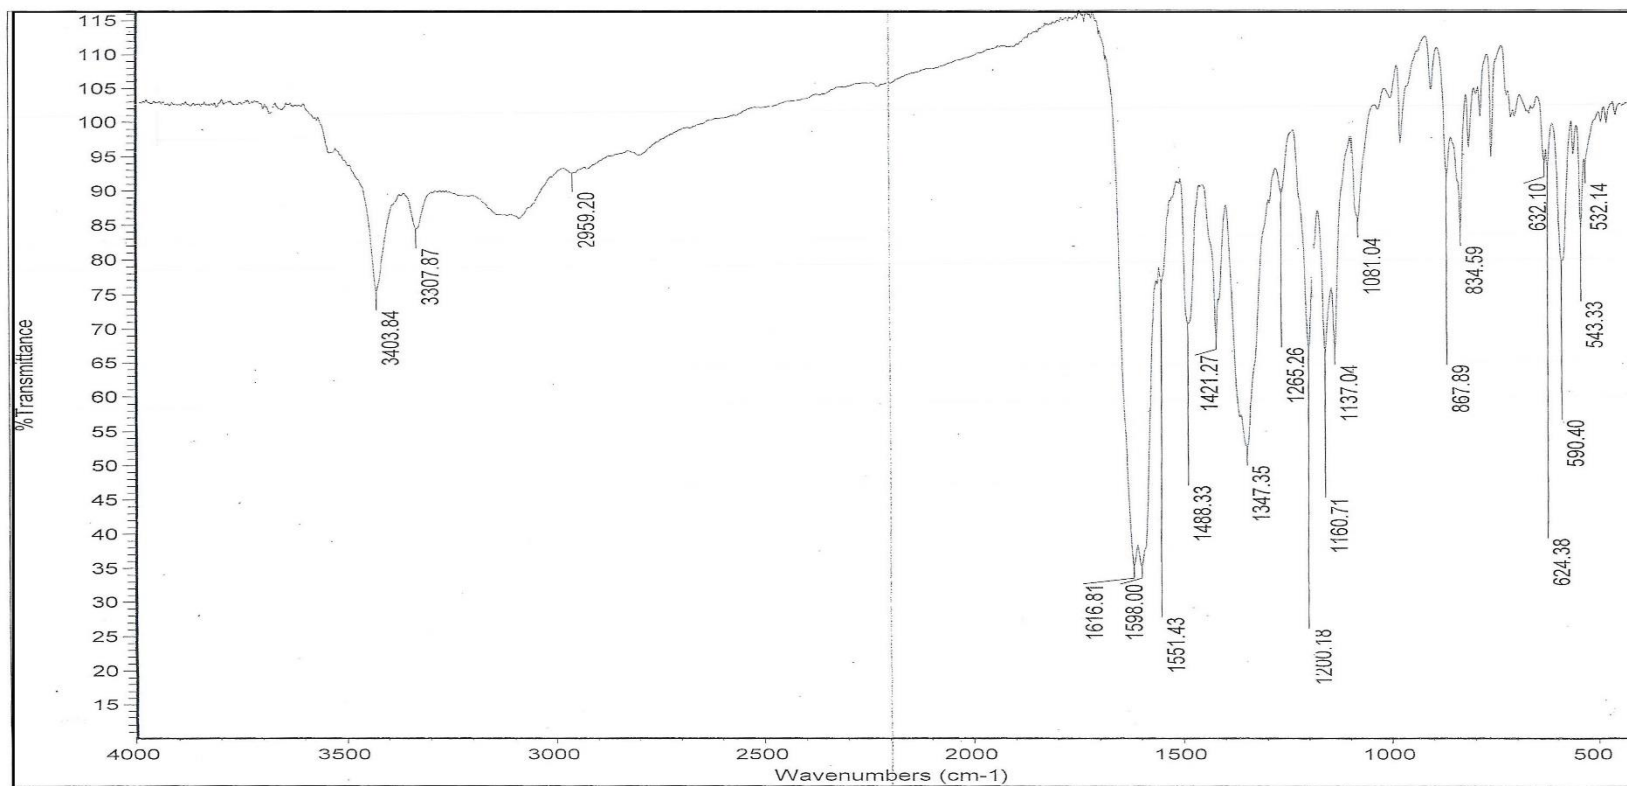

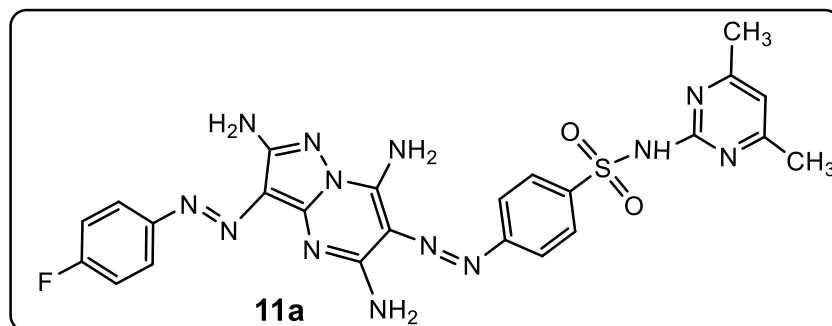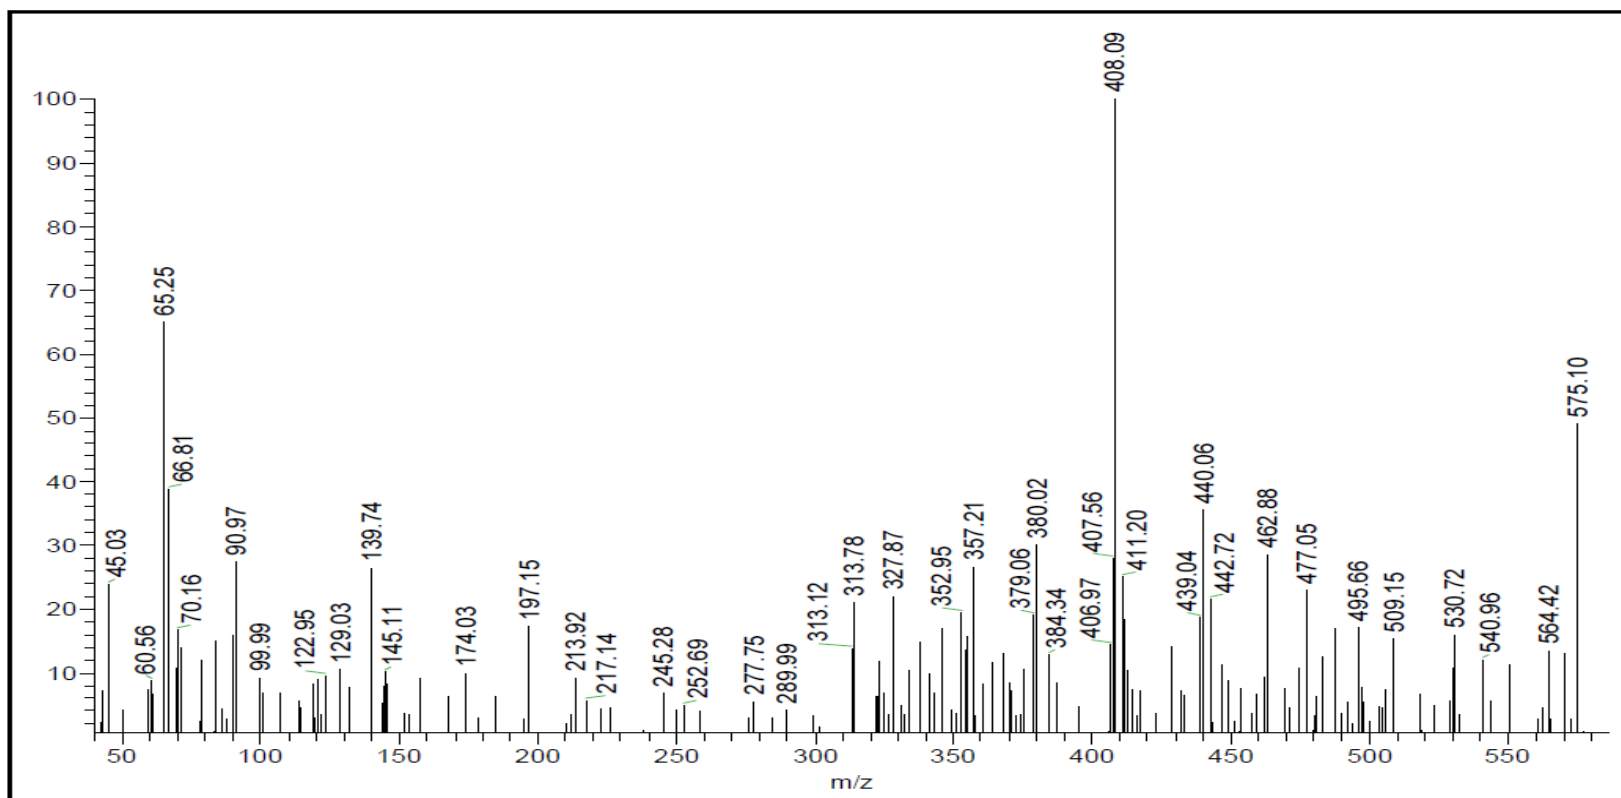



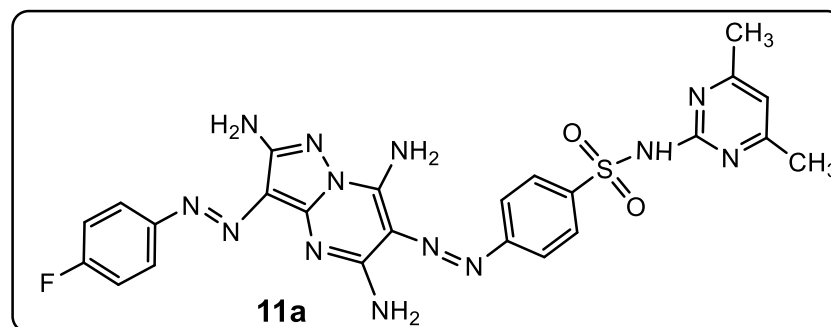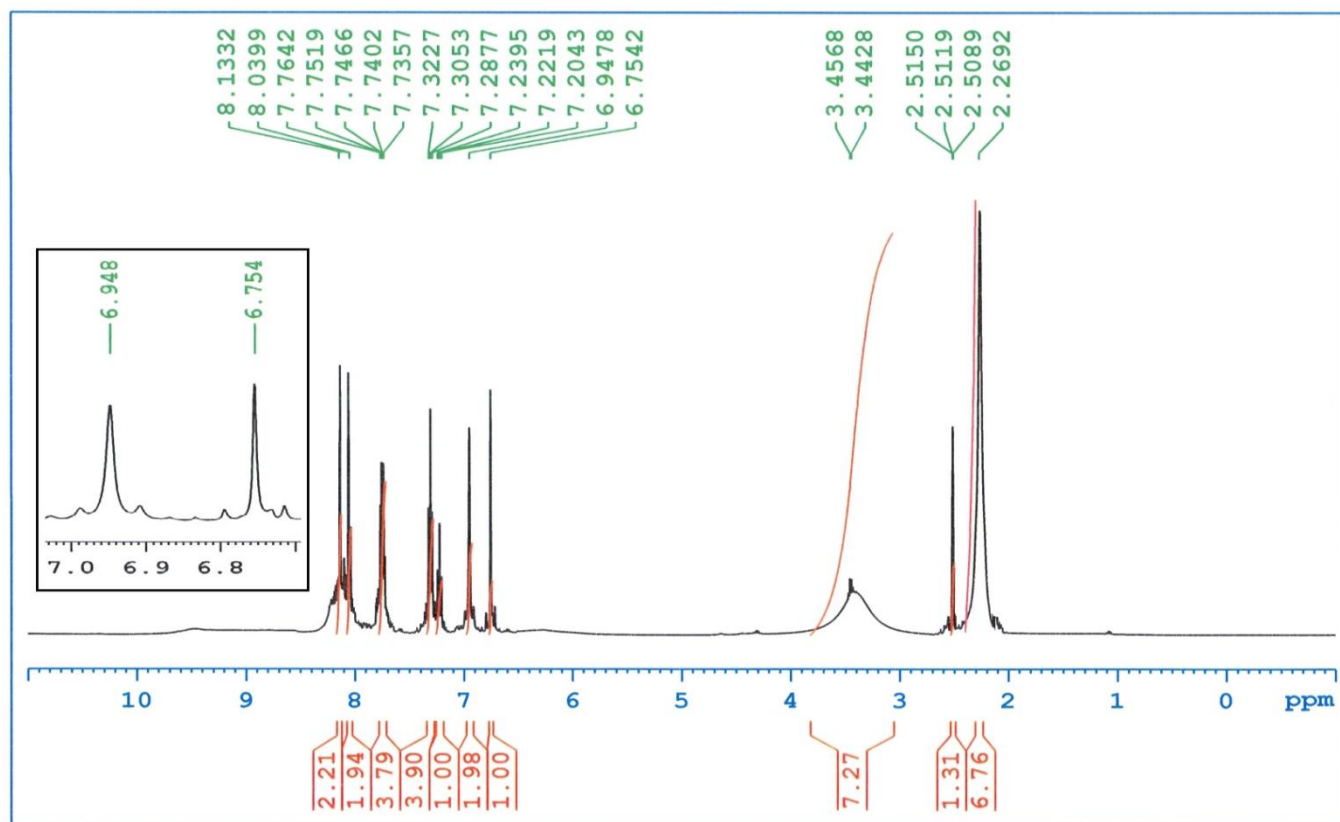

```

NAME      Jan22-2018-nmr
EXPNO     10
PROCNO    1
Date_     20180122
Time      7.38
INSTRUM   spect
PROBHD    5 mm PABBO BB-
PULPROG   zg30
TD         65536
SOLVENT   DMSO
NS         64
DS         2
SWH        10330.578 Hz
FIDRES     0.157632 Hz
AQ         3.1719923 sec
RG         203
DW         48.400 usec
DE         6.50 usec
TE         294.8 K
D1         1.00000000 sec
TDO        1

===== CHANNEL f1 =====
NUC1      1H
P1        14.56 usec
PL1       3.40 dB
PL1W      12.17042828 W
SFO1      500.1330885 MHz
SI        32768
SF        500.1300000 MHz
WDW       EM
SSB       0
LB        0.30 Hz
GB        0
PC        1.00

```

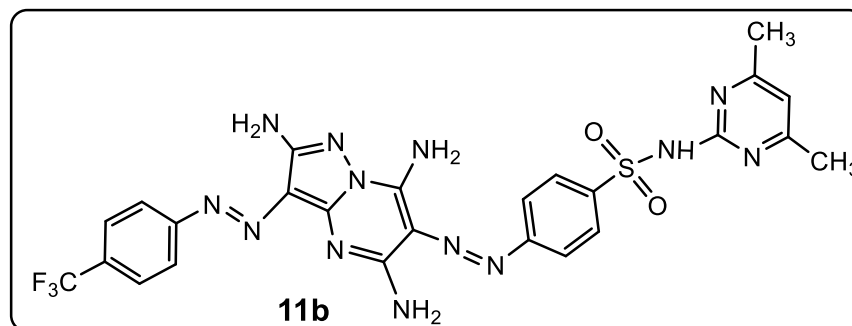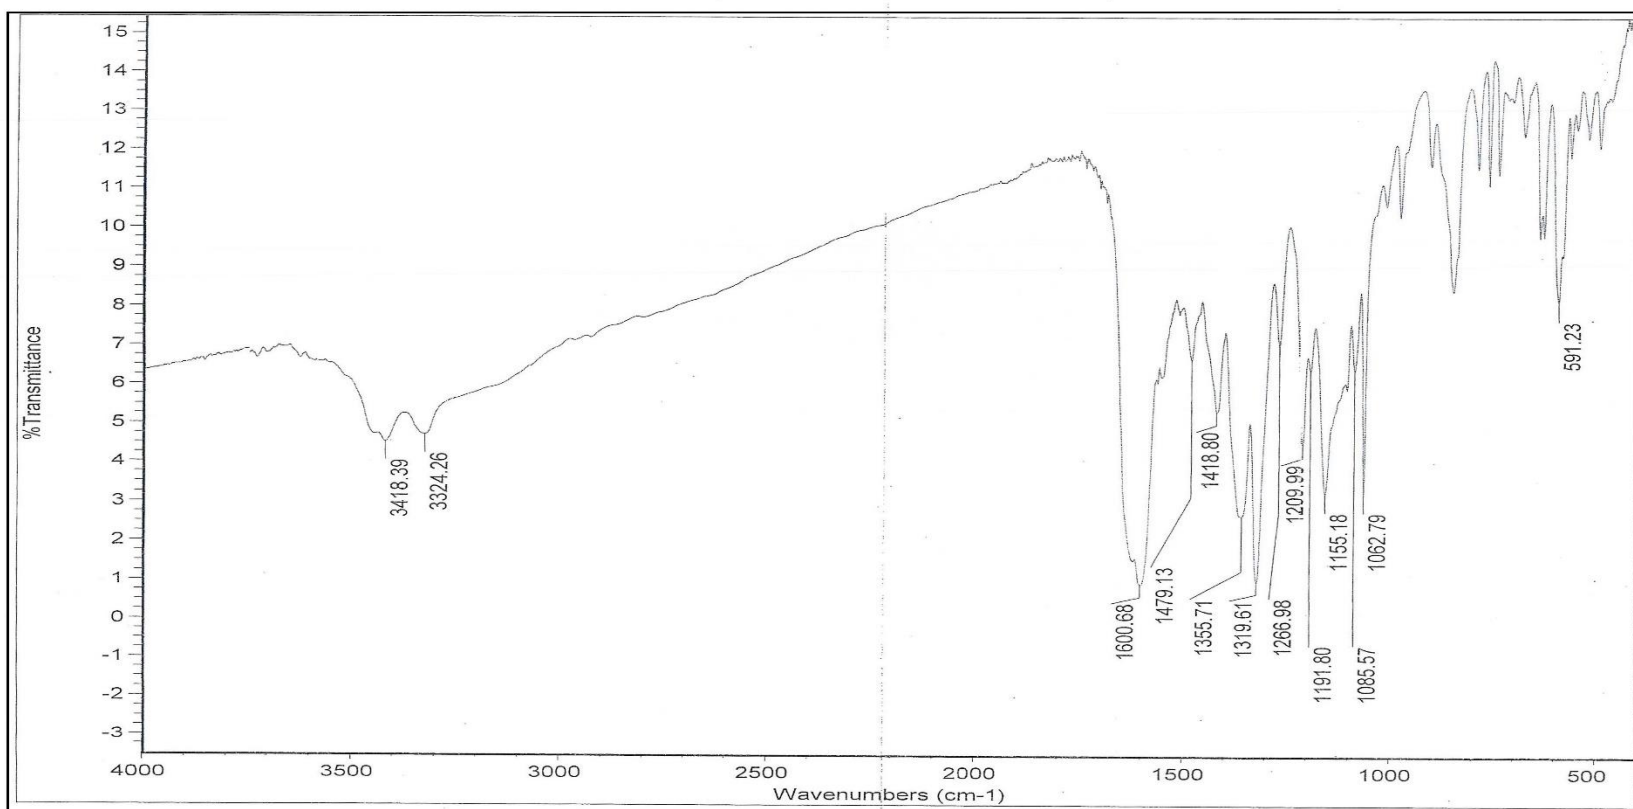

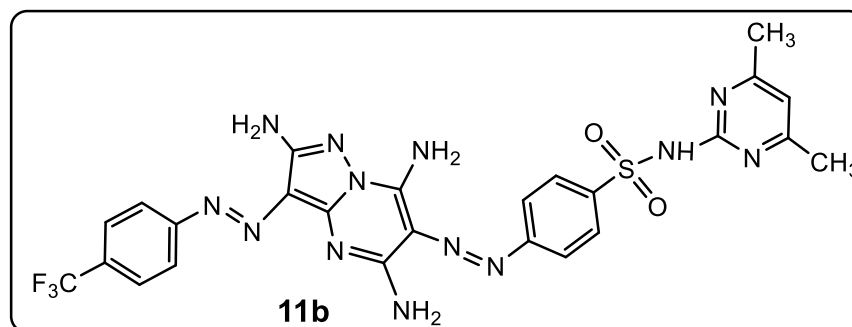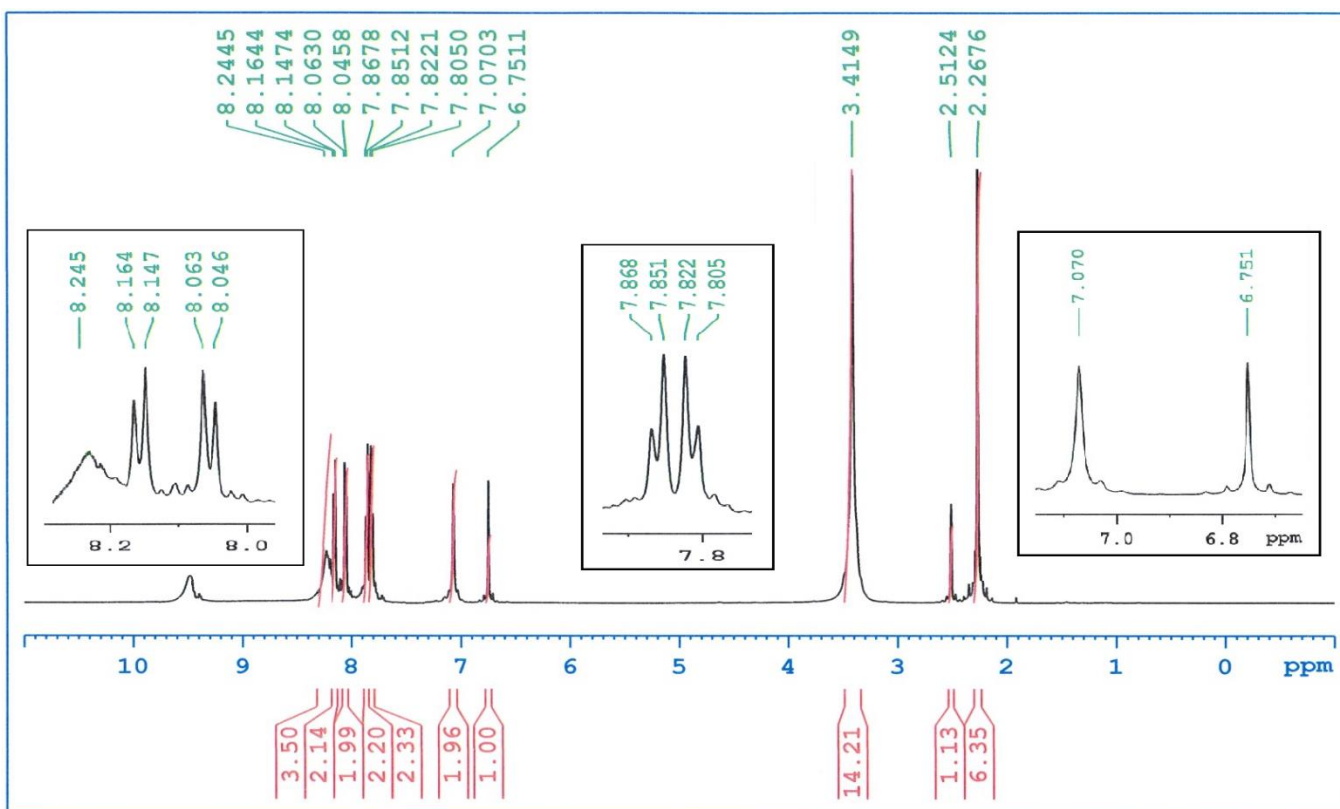

```

NAME      Jan22-2018-nmr
EXPNO    10
PROCNO   1
Date_    20180122
Time     7.38
INSTRUM  spect
PROBHD   5 mm PABBO BB-
PULPROG  zg30
TD       65536
SOLVENT  DMSO
NS       64
DS       2
SWH      10330.578 Hz
FIDRES   0.157632 Hz
AQ       3.1719923 sec
RG       203
DW       48.400 usec
DE       6.50 usec
TE       294.8 K
D1       1.0000000 sec
TDO      1

```

```

===== CHANNEL f1 =====
NUC1     1H
P1       14.56 usec
PL1      3.40 dB
PL1W     12.17042828 W
SFO1     500.1330885 MHz
SI       32768
SF       500.1300000 MHz
WDW      EM
SSB      0
LB       0.30 Hz
GB       0
FC       1.00

```

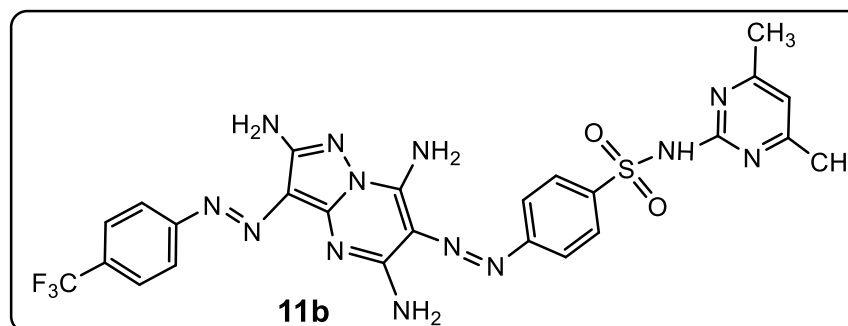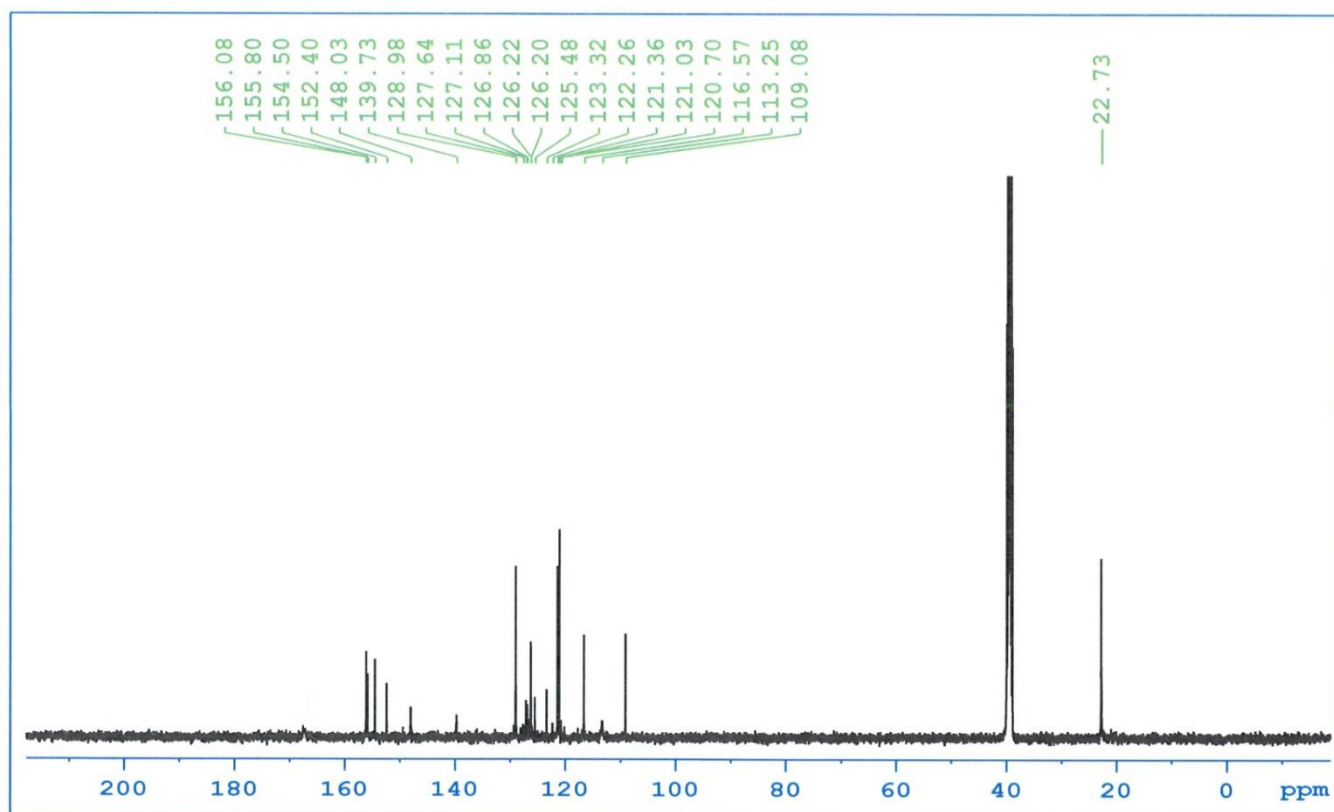

```

NAME      Jan22-2018-nmr
EXPNO     10
PROCNO    1
Date_     20180122
Time      7.38
INSTRUM   spect
PROBHD    5 mm PABBO BB-
FULPROG   zg30
TD         65536
SOLVENT   DMSO
NS         64
DS         2
SWH        10330.578 Hz
FIDRES     0.157632 Hz
AQ         3.1719923 sec
RG         203
DW         48.400 usec
DE         6.50 usec
TE         294.8 K
D1         1.0000000 sec
TDO        1

===== CHANNEL f1 =====
NUC1      1H
P1         14.56 usec
PL1        3.40 dB
PL1W       12.17042828 W
SF01      500.1330885 MHz
SI         32768
SF         500.1300000 MHz
WDW        EM
SSB        0
LB         0.30 Hz
GB         0
PC         1.00

```

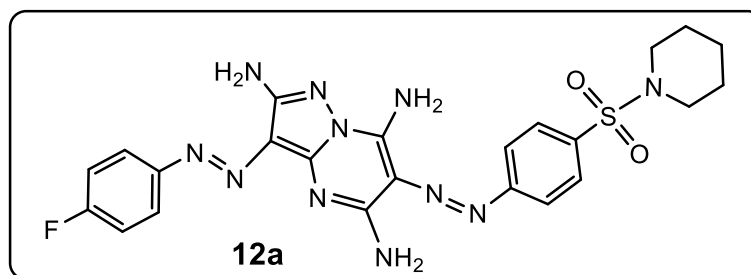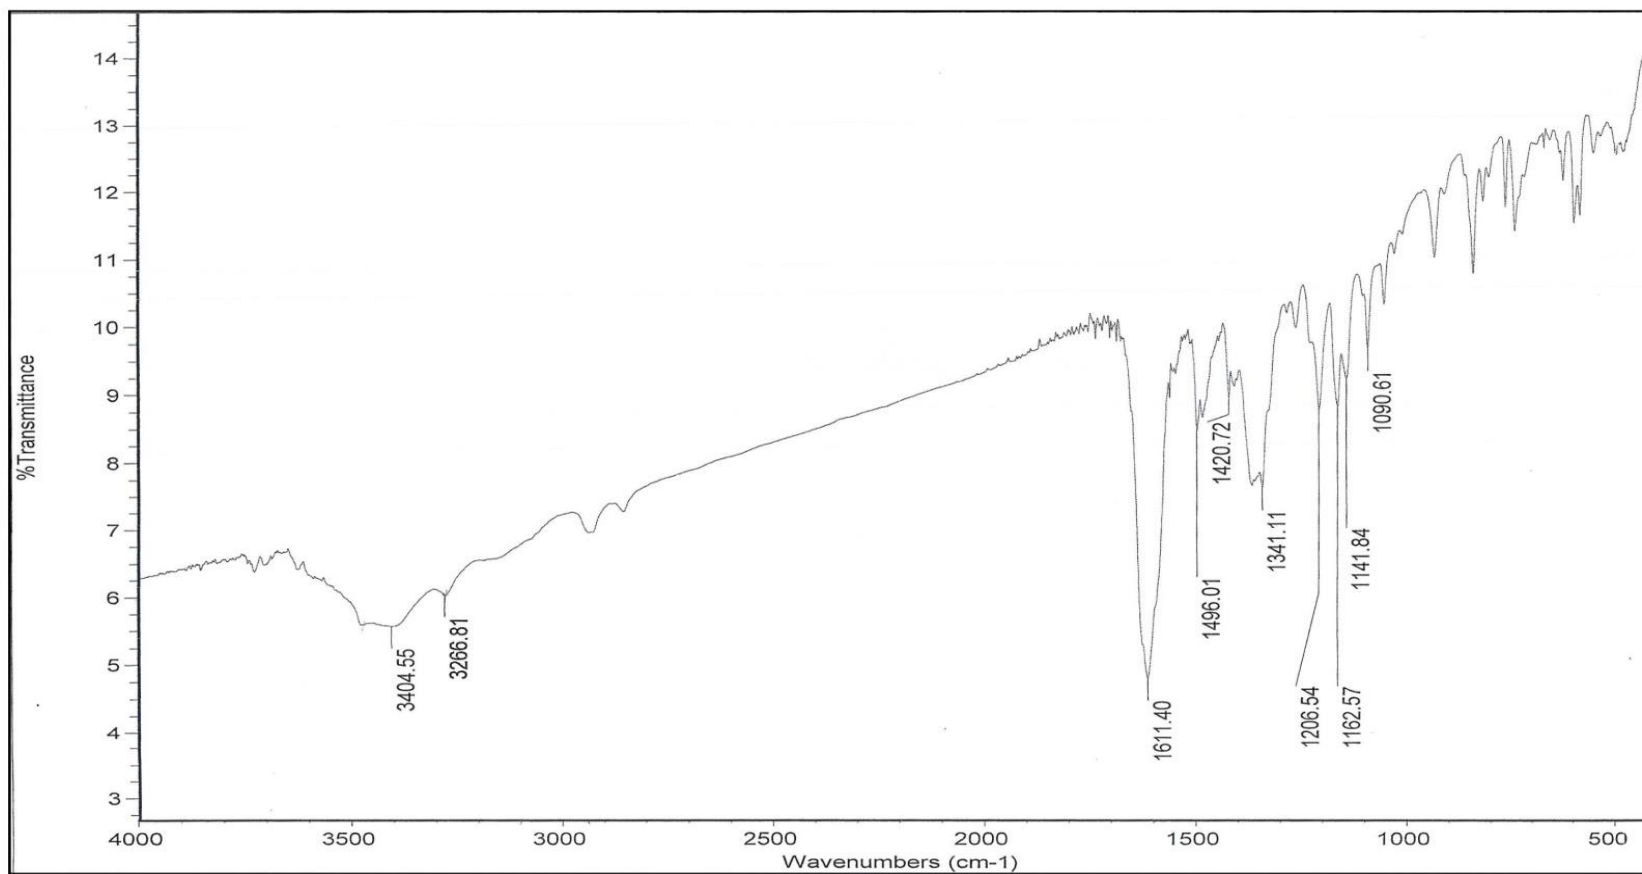

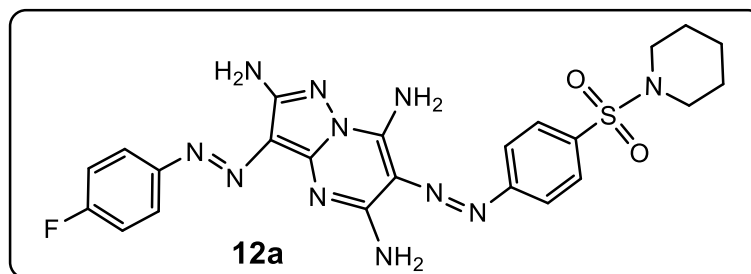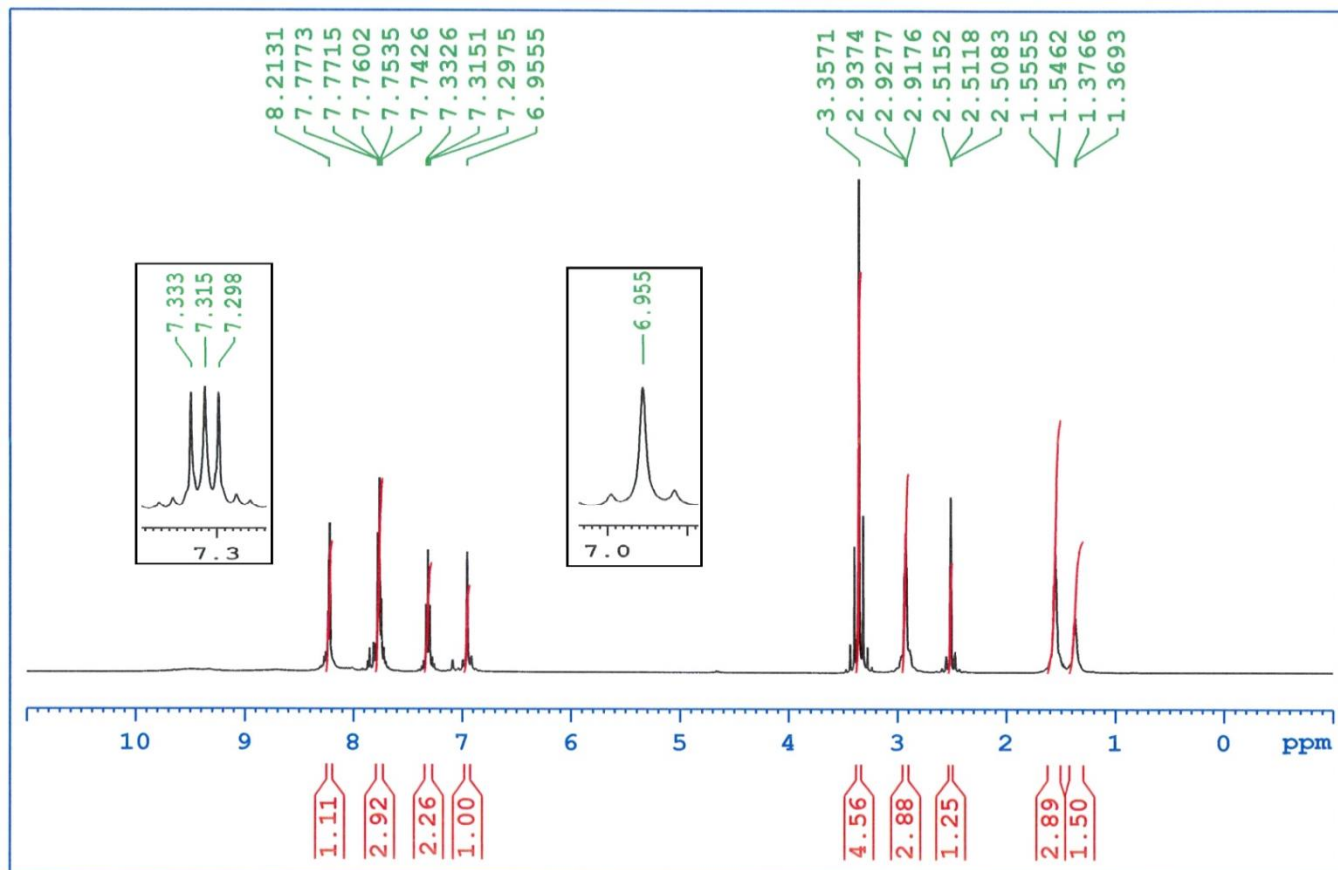

```

NAME      Jan22-2018-nmr
EXPNO     10
PROCNO    1
Date_     20180122
Time_     7.38
INSTRUM   spect
PROBHD    5 mm PABBO BB-
PULPROG   zg30
TD         65536
SOLVENT   DMSO
NS         64
DS         2
SWH        10330.578 Hz
FIDRES     0.157632 Hz
AQ         3.1719923 sec
RG         203
DW         48.400 usec
DE         6.50 usec
TE         294.8 K
D1         1.00000000 sec
TDO        1

```

```

===== CHANNEL f1 =====
NUC1      1H
P1        14.56 usec
PL1       3.40 dB
PL1W      12.17042828 W
SFO1      500.1330885 MHz
SI         32768
SF         500.1300000 MHz
WDW        EM
SSB        0
LB         0.30 Hz
GB         0
PC         1.00

```

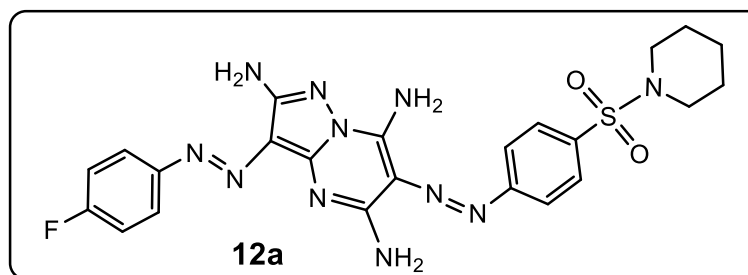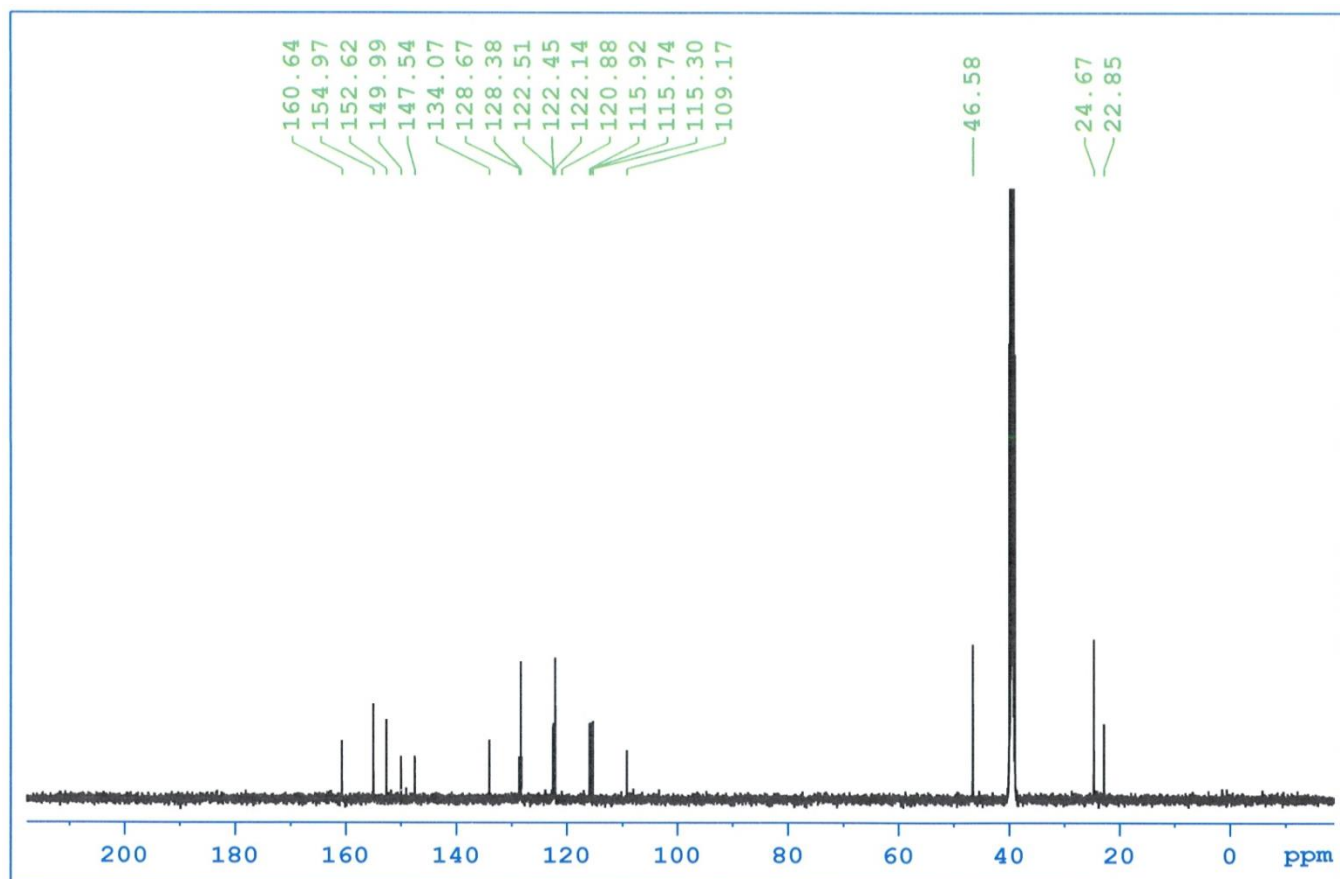

```

NAME      Jan22-2018-nmr
EXPNO    10
PROCNO   1
Date_    20180122
Time     7.38
INSTRUM  spect
PROBHD   5 mm PABBO BB-
PULPROG  zg30
TD       65536
SOLVENT  DMSO
NS       64
DS       2
SWH      10330.578 Hz
FIDRES   0.157632 Hz
AQ       3.1719923 sec
RG       203
DW       48.400 usec
DE       6.50 usec
TE       294.8 K
D1       1.00000000 sec
TDO      1

```

```

===== CHANNEL f1 =====
NUC1     1H
P1       14.56 usec
PL1      3.40 dB
PL1W     12.17042828 W
SFO1     500.1330885 MHz
SI       32768
SF       500.1300000 MHz
WDW      EM
SSB      0
LB       0.30 Hz
GB       0
PC       1.00

```

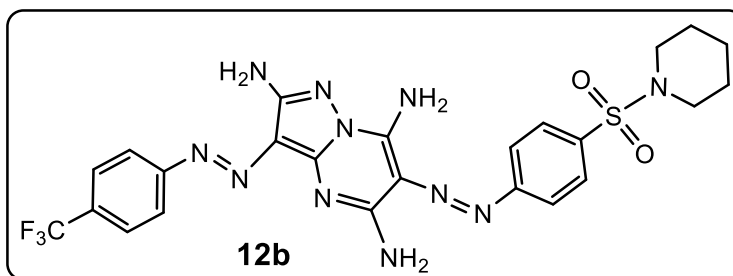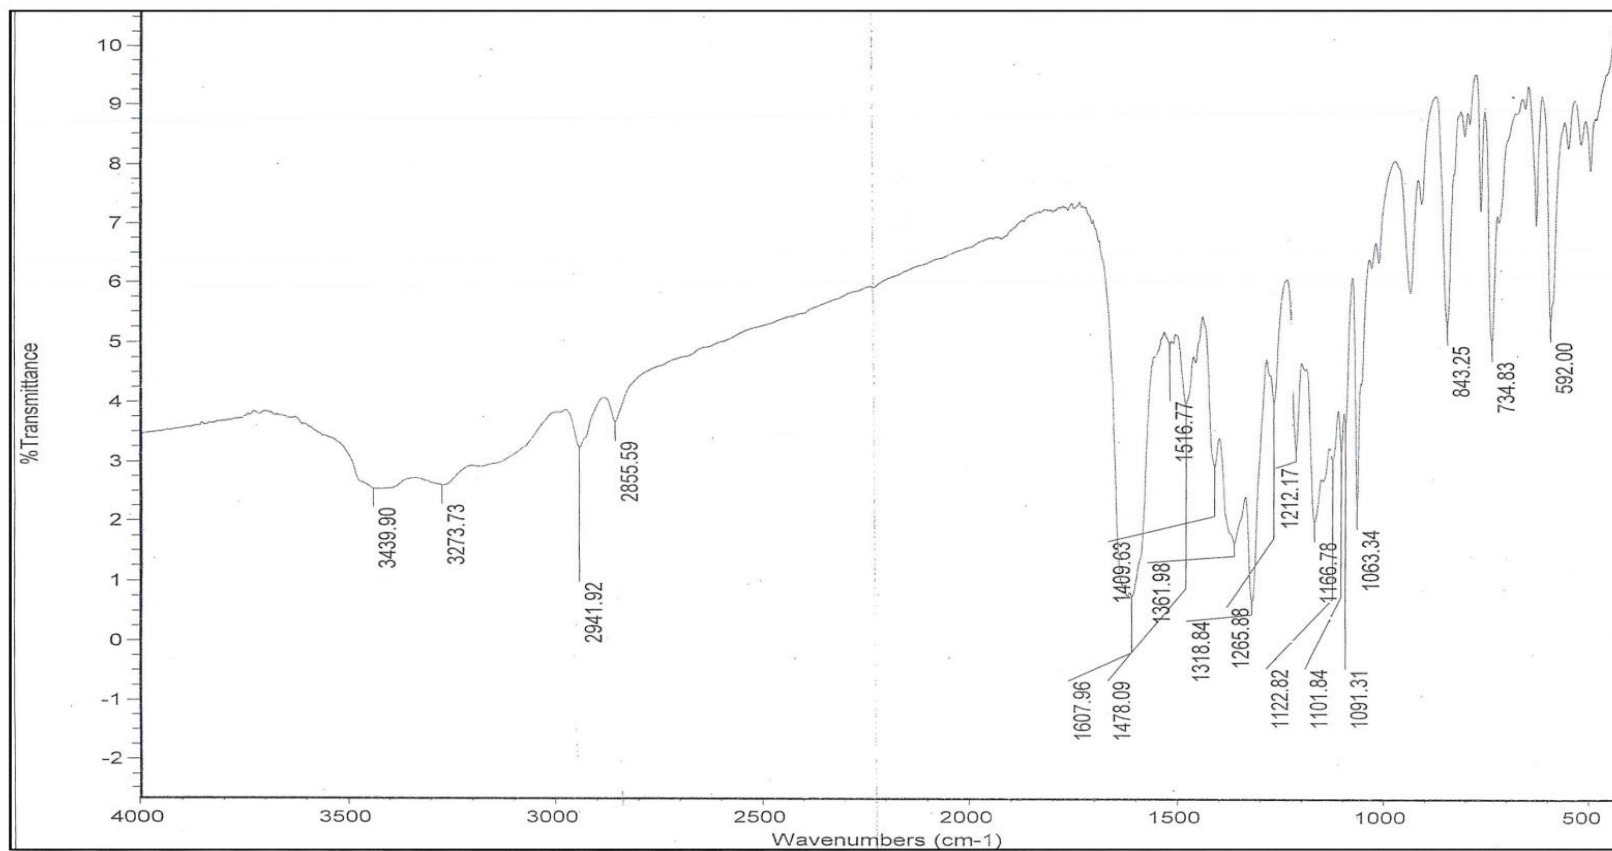



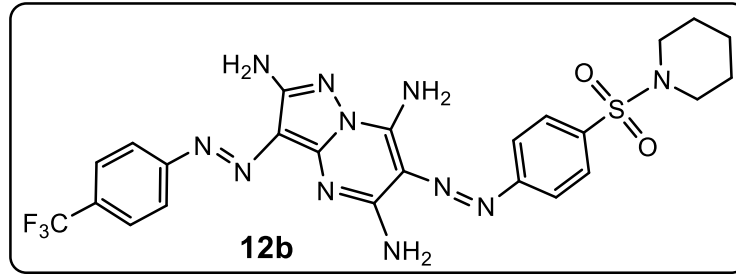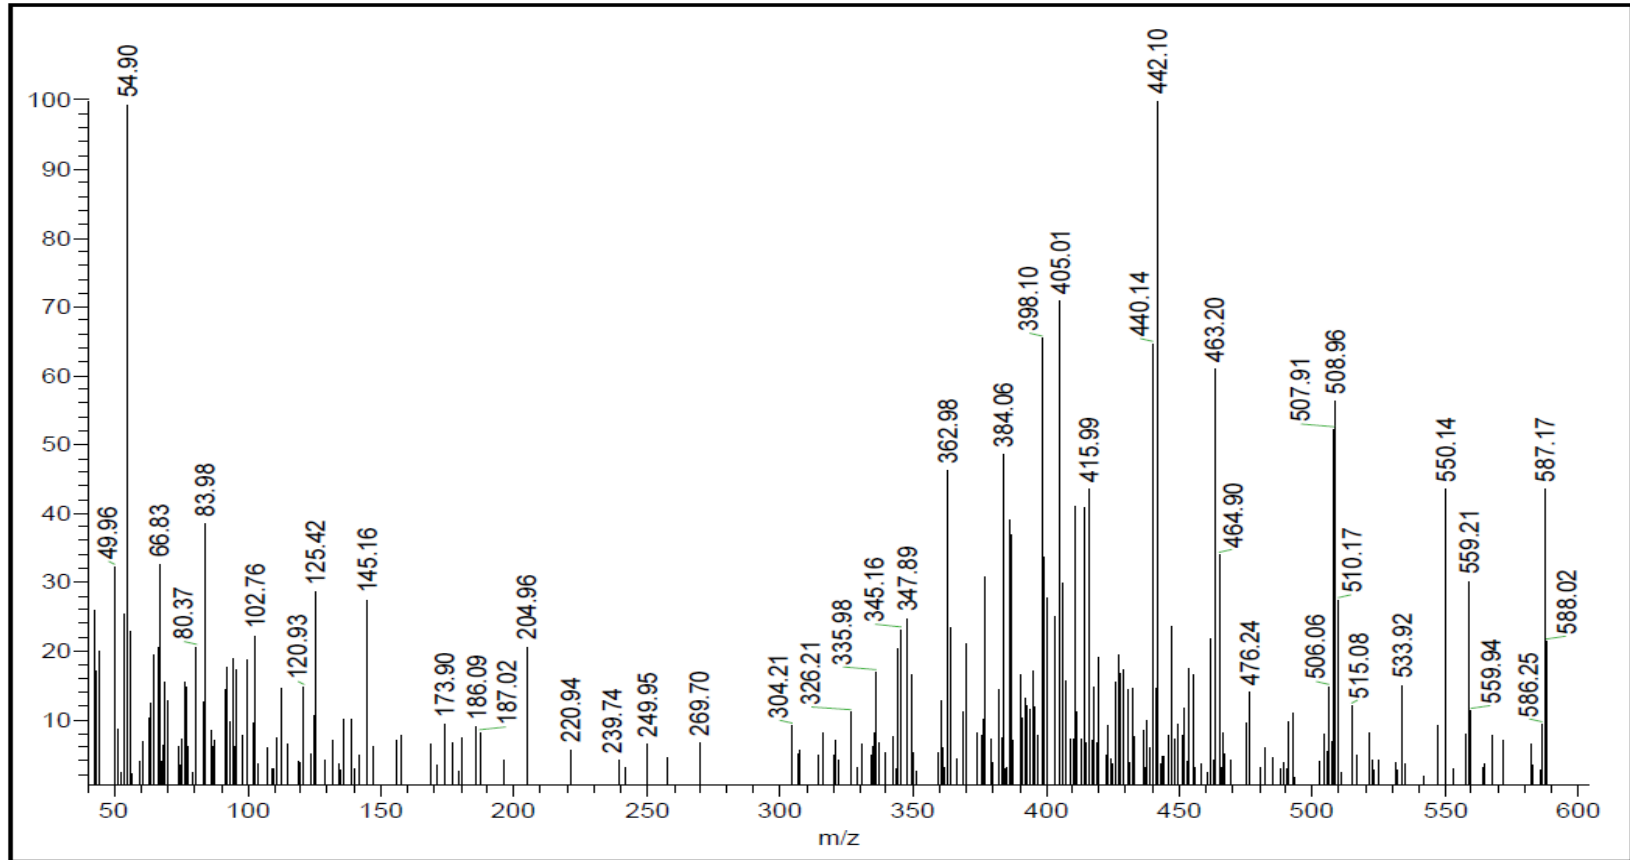

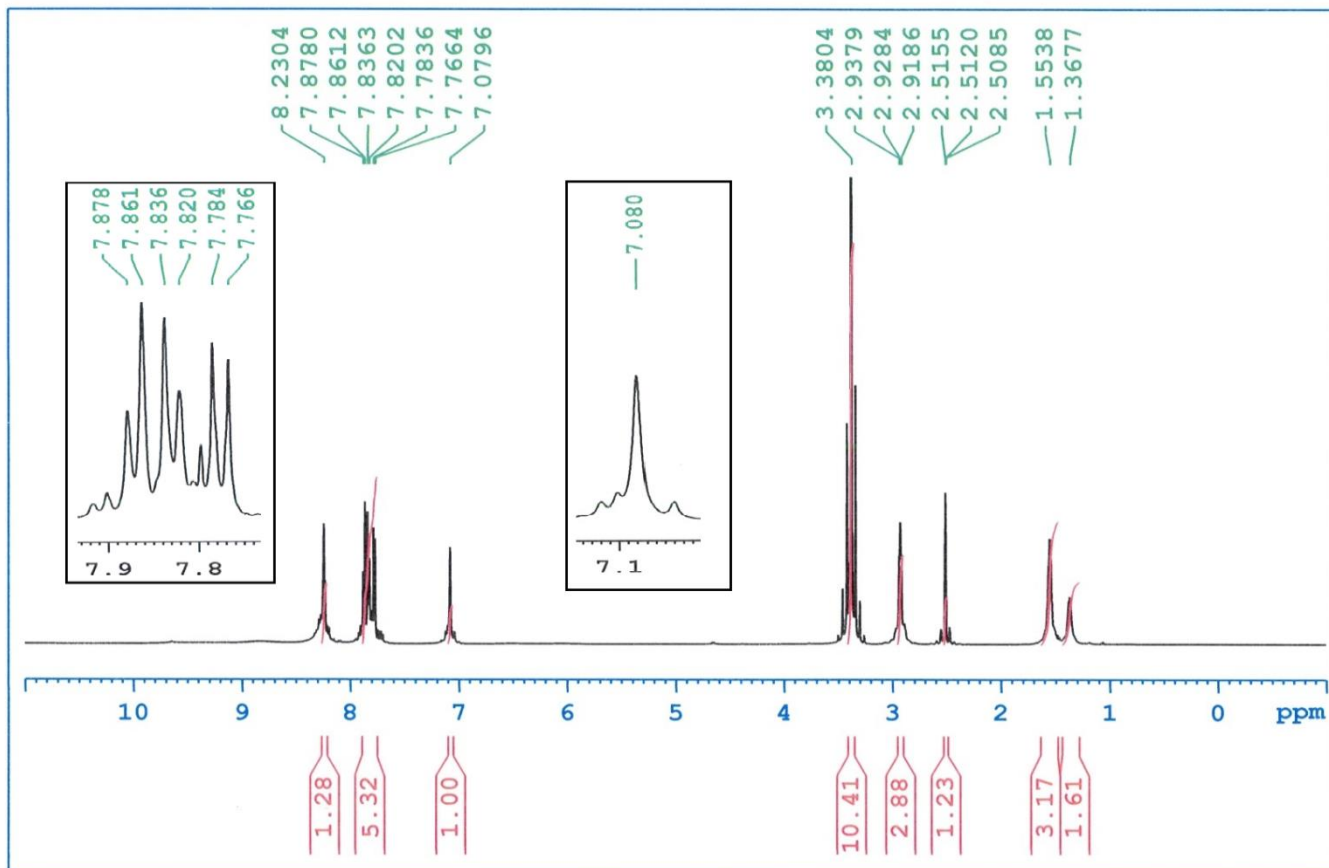

```

NAME      Jan22-2018-nmr
EXPNO     10
PROCNO    1
Date_     20180122
Time      7.38
INSTRUM   spect
PROBHD    5 mm PABBO BB-
PULPROG   zg30
TD         65536
SOLVENT   DMSO
NS         64
DS         2
SWH        10330.578 Hz
FIDRES     0.157632 Hz
AQ         3.1719923 sec
RG         203
DW         48.400 usec
DE         6.50 usec
TE         294.8 K
D1         1.00000000 sec
TD0        1

```

```

===== CHANNEL f1 =====
NUC1      1H
P1         14.56 usec
PL1        3.40 dB
PL1W      12.17042828 W
SF01      500.1330885 MHz
SI         32768
SF         500.1300000 MHz
WDW        EM
SSB         0
LB         0.30 Hz
GB         0
PC         1.00

```

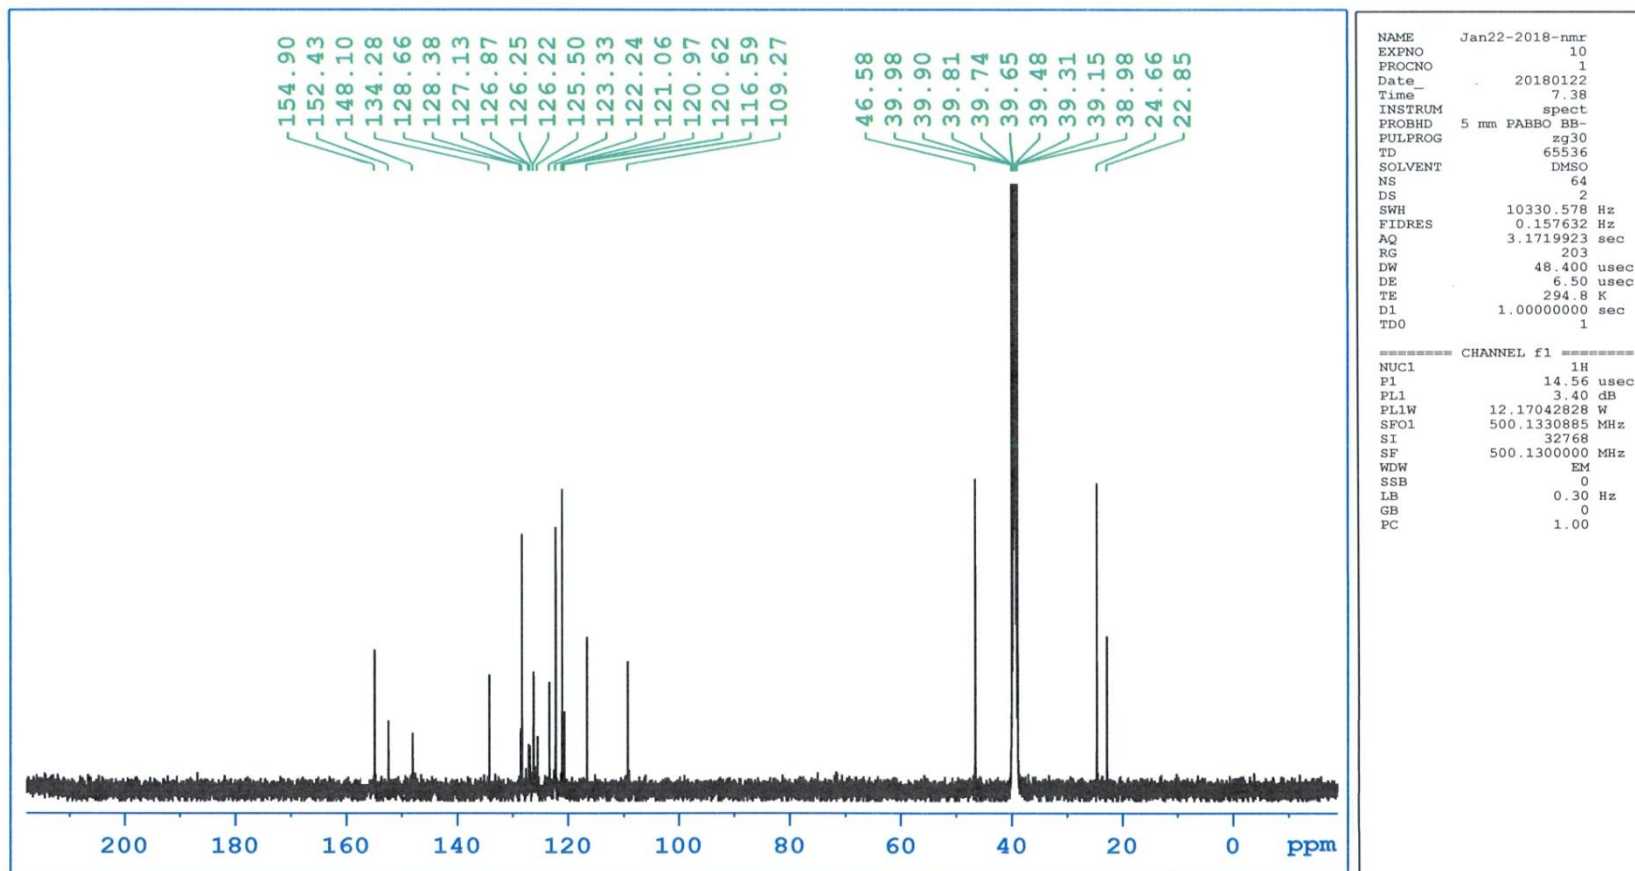

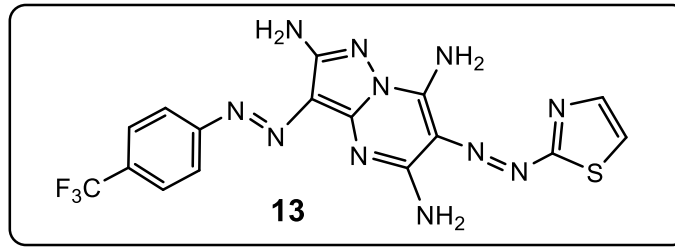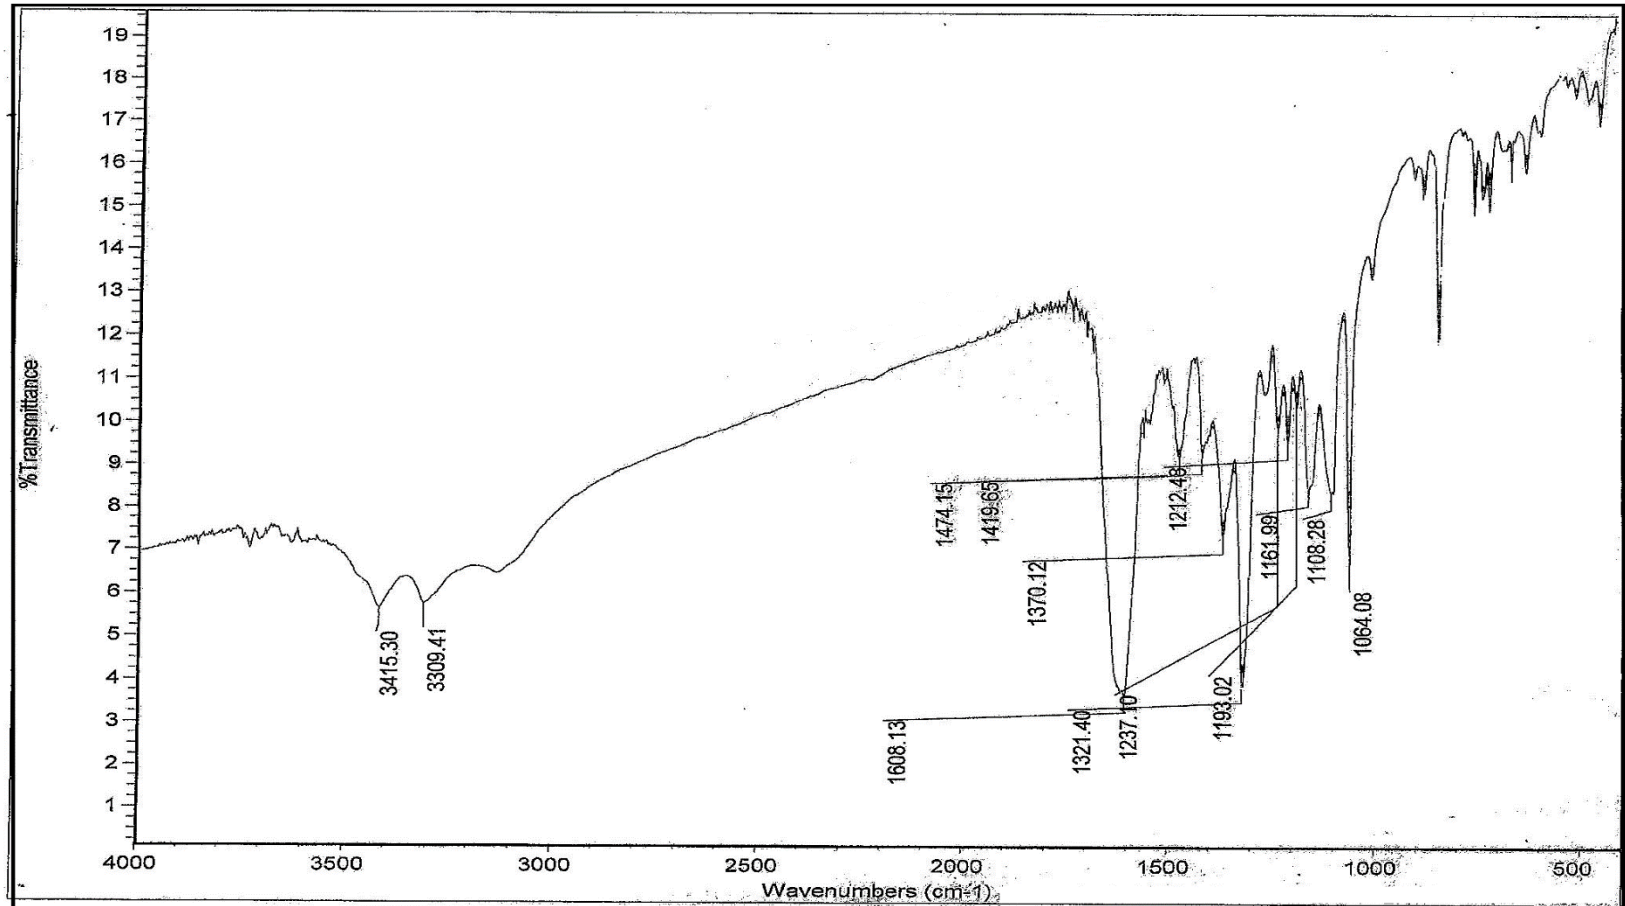

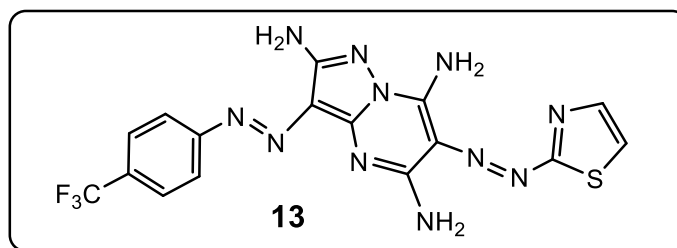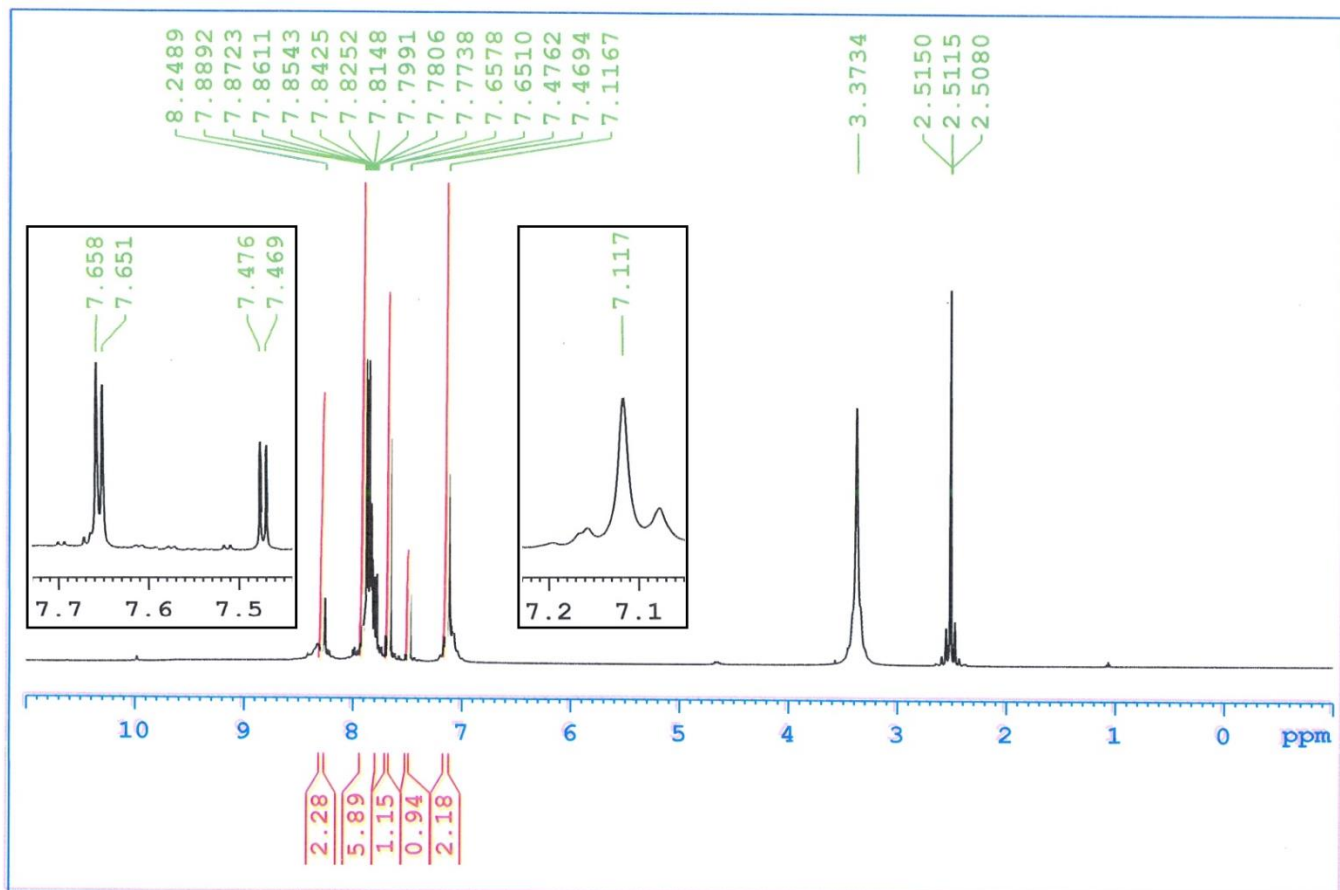

```

NAME      Jan22-2018-nmr
EXPNO    10
PROCNO   1
Date_    20180122
Time     7.38
INSTRUM  spect
PROBHD   5 mm PABBO BB-
PULPROG  zg30
TD       65536
SOLVENT  DMSO
NS       64
DS       2
SWH      10330.578 Hz
FIDRES   0.157632 Hz
AQ       3.1719923 sec
RG       203
DW       48.400 usec
DE       6.50 usec
TE       294.8 K
D1       1.0000000 sec
TDO      1

```

```

===== CHANNEL f1 =====
NUC1     1H
P1       14.56 usec
PL1      3.40 dB
PL1W     12.17042828 W
SFO1     500.1330885 MHz
SI       32768
SF       500.1300000 MHz
WDW      EM
SSB      0
LB       0.30 Hz
GB       0
PC       1.00

```

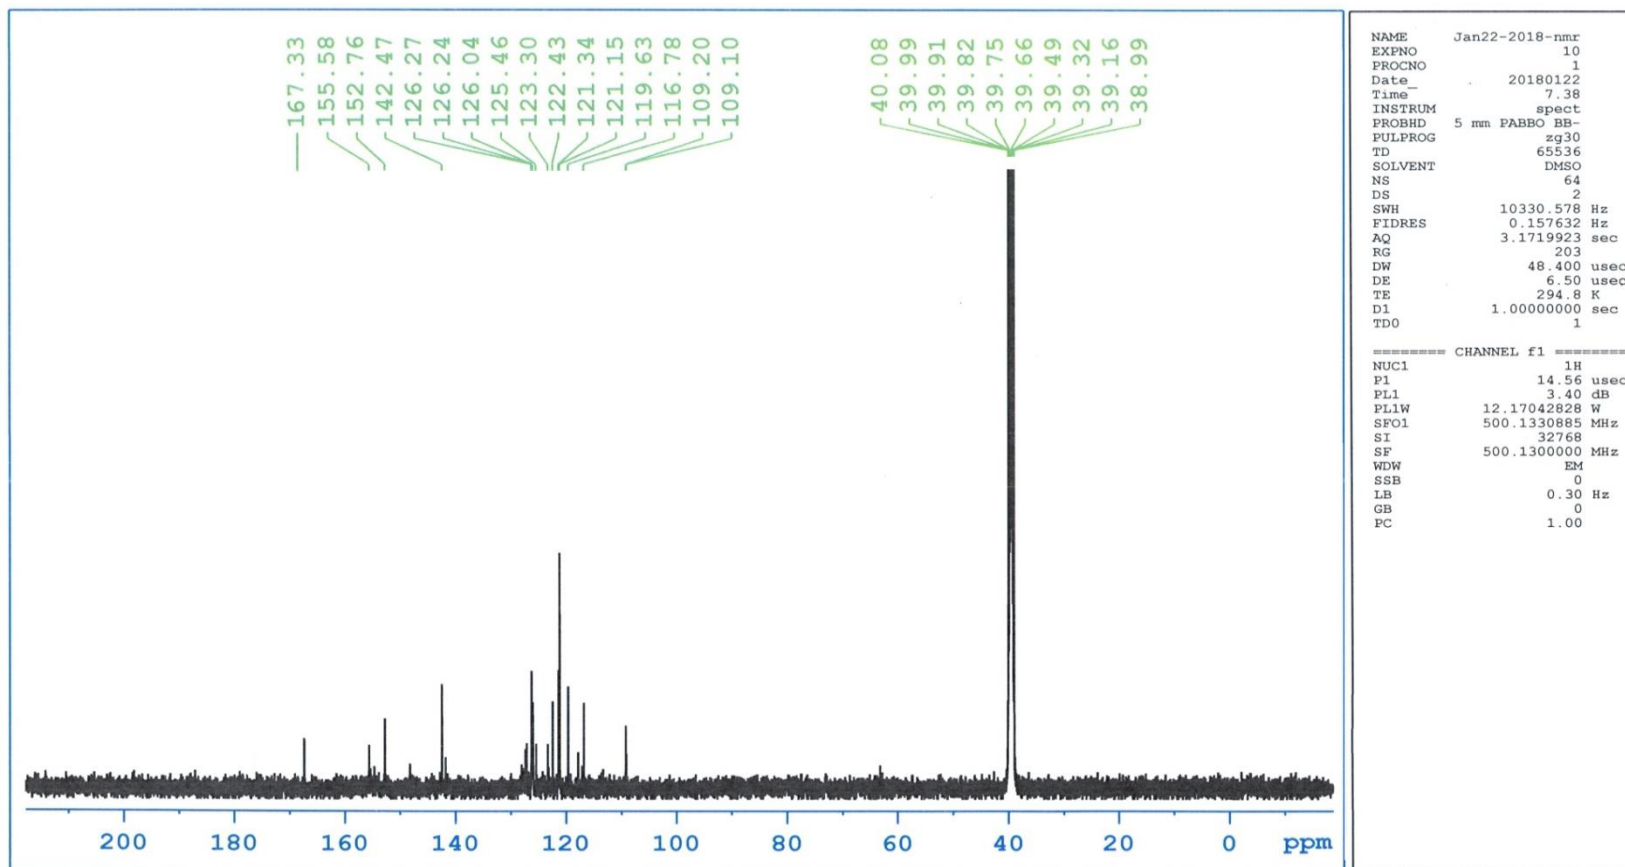

Supplement: molecules-24-01080-s001.pdf [file molecules-24-01080-s001.pdf]
